# Supplementary material for: Probiotics (Lactobacillus plantarum HNU082) Supplementation Relieves Ulcerative Colitis by Affecting Intestinal Barrier Functions, Immunity-Related Gene Expression, Gut Microbiota, and Metabolic Pathways in Mice
Source: PubMed Central journal article supplement (PMC9769980; doi:10.1128/spectrum.01651-22), 2022-11-02
Supplement: reviewer-comments.pdf [file reviewer-comments.pdf]

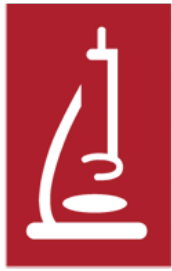

AMERICAN  
SOCIETY FOR  
MICROBIOLOGY

# Microbiology Spectrum

## Probiotics (*Lactobacillus plantarum* HNU082) supplementation relieves ulcerative colitis by affecting intestinal barrier functions, immunity-related genes expression, gut microbiota, and metabolic pathways in mice

yuqing Wu, Rajesh Jha, Ao Li, Huanwei Liu, Zeng Zhang, Chengcheng Zhang, Qixiao Zhai, and Jiachao Zhang

Corresponding Author(s): Jiachao Zhang, Hainan University

---

### Review Timeline:

|                     |                  |
|---------------------|------------------|
| Submission Date:    | May 4, 2022      |
| Editorial Decision: | June 9, 2022     |
| Revision Received:  | August 4, 2022   |
| Editorial Decision: | October 7, 2022  |
| Revision Received:  | October 11, 2022 |
| Accepted:           | October 14, 2022 |

---

Editor: Xiaoyu Tang

Reviewer(s): The reviewers have opted to remain anonymous.

### Transaction Report:

(Note: With the exception of the correction of typographical or spelling errors that could be a source of ambiguity, letters and reports are not edited. The original formatting of letters and referee reports may not be reflected in this compilation.)

DOI: <https://doi.org/10.1128/spectrum.01651-22>

June 9, 2022

Prof. Jiachao Zhang  
Hainan University  
Food Science  
58 renmin road  
Haikou, Hainan 570228  
China

Re: Spectrum01651-22 (**Probiotics (*Lactiplantibacillus plantarum* HNU082) supplementation relieves ulcerative colitis by affecting intestinal barrier functions, immunity-related genes expression, gut microbiota, and metabolic pathways in mice.**)

Dear Prof. Jiachao Zhang:

Thank you for submitting your manuscript to Microbiology Spectrum. When submitting the revised version of your paper, please provide (1) point-by-point responses to the issues raised by the reviewers as file type "Response to Reviewers," not in your cover letter, and (2) a PDF file that indicates the changes from the original submission (by highlighting or underlining the changes) as file type "Marked Up Manuscript - For Review Only". Please use this link to submit your revised manuscript - we strongly recommend that you submit your paper within the next 60 days or reach out to me. Detailed instructions on submitting your revised paper are below.

Link Not Available

Below you will find instructions from the Microbiology Spectrum editorial office and comments generated during the review.

ASM policy requires that data be available to the public upon online posting of the article, so please verify all links to sequence records, if present, and make sure that each number retrieves the full record of the data. If a new accession number is not linked or a link is broken, provide production staff with the correct URL for the record. If the accession numbers for new data are not publicly accessible before the expected online posting of the article, publication of your article may be delayed; please contact the ASM production staff immediately with the expected release date.

The ASM Journals program strives for constant improvement in our submission and publication process. Please tell us how we can improve your experience by taking this quick [Author Survey](#).

Sincerely,

Xiaoyu Tang

Editor, Microbiology Spectrum

Journals Department  
American Society for Microbiology  
1752 N St., NW  
Washington, DC 20036  
E-mail: [spectrum@asmusa.org](mailto:spectrum@asmusa.org)

Reviewer comments:

Reviewer #1 (Public repository details (Required)):

Metagenome and transcriptome raw data

Reviewer #1 (Comments for the Author):

Article summary and impression:

In the article Spectrum01651-22, the authors seek to describe the impact of supplementation of the food-derived bacterial strain *Lactiplantibacillus plantarum* HNU082 (Lp082) on the commonly used DSS-induced IBD model in C57BL/6J adult male mice with otherwise normal microbiota and diet. The authors induce inflammation with DSS supplementation in animal water, stop DSS supplementation, and then add either Lp082 or the compound SASP (although the rationale for using SASP is not provided, I assume this is a positive control for alleviation of DSS induced inflammation) to evaluate Lp082 impacts on DSS treated mice. The authors perform a number of analyses in an attempt to provide a comprehensive assessment of the impact of Lp082 treatment on DSS treated mice including the following: assessment of 1) animal behavior, 2) immune organ weight, 3) serum inflammatory cytokines, 4) colon structure and histopathology and stool formation, 5) colonic mucin and tight junction integrity, 6) microbial taxa changes and abundance, 7) SCFA acid content, 8) host epithelial transcriptional responses, as well as an attempt to connect microbiome changes to host physiology through correlation modeling. If presented accurately and completely, such a compilation is a useful addition to the scientific community and would provide a greater understanding of the impact of *Lactiplantibacillus* on colitis in healthy mouse models. However, the current version of the manuscript has a number of shortcomings, many of which are summarized below. Overall, the text and figures are confusing to follow as key information required to accurately assess the data and author conclusions has been left out. Information omission begins at the beginning of the paper and builds to where it's difficult to assess the content and accuracy of subsequent data.

Preface to the following comments:

The manuscript does not use page numbers and line numbers. To review this document, I exported the pdf to word and refer to the title page as page 1, with the first line of the title being line 1.

Major points:

1. Conditions used in figure 3A-D are inadequately described, such that I cannot sufficiently assess sample timing, sample size, comparisons made, and biological meaning. A primary contributor to this is a lack of a clear description on what M\_A-M\_D and T\_A-T\_D are and how the figures relate to sample timing. This makes it hard to assess other data in the manuscript, including overall conclusions that assess microbiome impact on the host response, which is a primary conclusion that the authors try to address.
2. Although Lp082 probiotic introduction is the primary study intervention, the authors do not mention or discuss Lp082 presence in the stool and its own genomic and metabolic contributions to the host response and the SCFA content. There is a label on Figure 3D that says "*Lactobacillus plantarum*" but it is not discussed. I'd like to see specific Lp082 evaluation and discussion in their metagenome or via another sampling method (like stool qPCR if samples still exist) that indicates the abundance of Lp082 at the times that they sampled in Figure 3 and preferably discussed in light of the experiments and data discussed in Figures 4-6.
3. The Results section "The regulatory roles of SCFAs" and Figure 4 appear to be among the weaker sections in the paper. The figures are not well described, making it difficult to understand the graphs and interpret the data (specific points made below in "minor points"). Lines 172-175 claim "the contents of acetic acid, propionic acid, butyric acid were significantly decreased in the DSS group but significantly increased in the Lp082 group ( $p < 0.05$ ) (Fig. 4b)," but this information does not match the data in Fig. 4b. Fig. 4b shows that the cecal levels of all five evaluated SCFAs are lower than the control in DSS, Lp082, and SASP. Additionally, none of the five SCFAs are higher in Lp082 cecal contents than DSS, and in most cases, the five SCFAs appear lower in Lp082 than DSS. Thus, Fig 4b contradicts their claim that SCFAs improve host outcomes in response to Lp082 treatment after DSS. This is further reiterated by the rather small fold-change increase in the two pathways they indicate promote SCFA production in Lp082 "the fermentation of pyruvate to propionate I and the fermentation of pyruvate to acetate and lactate II" in figure 4A. The authors' conclusion that Lp082 promotes SCFA production is heavily leveraged in the discussion section, but is not well supported in their data.
4. The authors attempt to model microbial impact on the host using the bacterial metagenome and a host transcriptional analysis. This comparison would be better made if there was a microbial metatranscriptome/proteome included in this paper to support the microbial genomic data. In the absence of this, an evaluation of Lp082 itself in the host, and a weak finding on SCFA changes in response to Lp082, I find the correlations reported in figure 7 to be more speculative rather than well supported by the manuscript.
5. I'd like to see an analysis or discussion of the genes in Figure 6D for Lp082. The authors indicate that these genes in 6D are upregulated in DSS and some are pro-inflammatory. I'd like to know if Lp082 treatment suppresses these genes when compared to DSS alone.
6. Other missing information that should be addressed in the manuscript:
  - a. Rationale:
    - I. Why was SASP used?
    - II. Why was Lp082 used specifically?
  - b. Experimental design, conditions, methods:
    - I. Fig S1B does not adequately describe mouse behavior as it's a single non-descriptive image of each mouse.
    - c. Timing of experiments: After line 101, the sampling times of most experiments are omitted or inadequately described.
    - d. Sample sizes: Sample sizes and number of repeats are omitted. In most cases, the specific datapoints in figures are not well described as to what they are measuring.
  - e. Statistics:
    - a. Only one statistical test is indicated in the paper, Wilcoxin signed rank test, line 546 in the methods. Adding the test run to each figure legend would be appropriate and helpful.
    - b. Conditions statistical tests being used on are not obvious, in part due to the lack of descriptions on sample sizes and

replicates.

Minor points:

1. Missing information that should be addressed:

a. Rationale:

I. The introduction provides weak descriptions and evidence for use of a probiotic in general to treat UC and Lp082 specifically. The introduction would benefit from further elaboration on what is known about probiotic treatment of UC and indicate what is or isn't known about Lp082 usage in UC specifically rather than using general "probiotics" references. Along with this, lines 55-59 are confusing as written, but this may be addressed when more information is added about those two points.

II. The intro (starting at line 62) provides weak background on data for SCFA alleviation of IBD. Citing work and adding text of SCFA impact of IBD (preferably UC and action through immune cells) would be helpful.

b. Impact:

I. Referencing lines 94-115: No text is provided to indicate what the alterations in water intake, food intake, body weight, DAI, neurological responses, immune organ index, spleen and colon color and structure, hyperemia, and feces structure mean in the context of disease in DSS or in the Lp082 treated animals. This is not addressed elsewhere in the paper and would help the reader understand the impact of your results.

II. Lines 125-145: Text here would benefit from at least a little description on what this data means at this point in the writing. E.g. what does MUC2 loss and ZO1 abundance suggest about Lp082 effects?

c. Methods:

I. Scoring: Since understanding the scoring system used is important to understanding the data, further describing the numbering and what that means would help the reader understand the severity of the DSS model and the subsequent relief without looking up the methods reference (either in the figure legends (Figure 1B) or in the methods (see lines 480-481 where the modifications to DAI are not indicated). DAI and immune organ index should be described at some level in the results and figure legends as well so the reader knows what the data is describing without the methods.)

II. How was "surface density" quantified? Line 144, figure 2F-G.

III. Indicate the specific diet provided to the mice (line 459).

IV. Elaborate on what you mean by "mouse colon samples" on line 537 for RNA-seq.

d. Results structure:

I. The experiments, including the rationale, the samples, and the conditions, should be described at some level prior to discussing the results in the Results text so the readers know what the results are referencing.

II. Brief overall conclusions should be provided in the Results text to continue engaging the reader and leading them along your thought process. This can be partially addressed by moving text from the Discussion section to the Results. E.g. lines 302-306 can be moved to the results section where diversity is discussed.

e. Figures:

I. Figure 1:

Fig 1A - the arrows make it look like PBS only led to weight and colon assessment, probiotics to immune indices, SASP to sequencing. Collapsing the arrows would address this.

Fig 1B - what's being compared for the stats is not well described

Fig 1C - the bars for stats are shifted (also make sure the lines are the same point thickness for stats in each figure)

Fig 1D - "molding ending" is not described in the text. Rephrase or define. Also decrease the numbers in the X axis as they are too condensed. The title "duration of probiotic intervention (day)" is an incorrect title as this figure shows duration of the entire experiment, including pre-treatment with DSS before probiotics.

Fig 1E - there's no Y-axis label and the datapoints are not described

II. Figure 2:

Fig 2A - you might try to line up your red boxes better so they better represent the blow ups (and make straighter red lines).

Fig 2B - add microscopy information for the antibody stains in the legend and/or the methods section. Although the staining method cites another paper, it's best to include antibody information in the methods section. MUC2, ZO-1, and the blue marker are not labeled in the figure and in the figure legend.

Fig 2C - the y axis is missing a metric

Fig 2f-g - the y axes are missing metrics (as noted above, the method to define these numbers is not stated).

III. Figure 3:

Fig 3A-C groupings not labeled as indicated above

Fig 3D - The meaning of the red highlighting is not indicated in the figure legend. No information is provided about the tree, including what it represents and what the colors indicate. The heat map values are not described - what is being compared and what does a value of zero mean?

IV. Figure 4:

Fig. 4A - It is not entirely clear where this data comes from. My assumption was the metagenome, but the Acetic acid sub section has me unsure. Describe this figure more, taking care to describe what the acetic acid subsection is evaluating.

Fig. 4C-D - A description of the tree components is missing. Describe the correlation analysis more in the text and figure legend.

V. Figure 5: I think this entire figure would be best placed in the supplement as it's really just a sub-point of the contents of figure 6 (but it won't fit in figure 6). You might also remove "distribution" from the title and legend as this suggests tissue spatial information but is not needed.

VI. Figure 6: Overall, the less color you use, the clearer this figure will be.

Fig 6A-C: I recommend condensing as Fig 6A. Describe what gene ratio is in the figure legend.

Fig 6D-F: I recommend condensing as Fig 6B.

Fig 6G-J: I recommend condensing as Fig 6C. I and j legends are swapped. Describe ifcSE in the legend.

2. The authors confuse whether they are studying Lp082 prevention or treatment of colitis by using verbiage referring to "prevention" and "treatment" interchangeably. This makes it difficult to track what the authors are trying to accomplish (for example, line 60 says "relieving", lines 76 and 87-88 say "prevention"). Because the authors state that the colitis inducer (DSS) is administered at the time of treatment (Lp082) in the beginning of the Results to evaluate prevention (line 87), but Figure 1A shows that Lp082 is being added at day 8 (so not at the time of induction), I cannot assess which is being studied: Lp082 1) treatment or 2) prevention of UC. My best assumption is that the methods section is correct, and the methods says that DSS is used prior to addition of Lp082, and thus the authors are studying Lp082 relief of colitis. Thus, the language in the paper should be altered to indicate that Lp082 was administered after DSS induced colitis and observed effects are Lp082 alleviation of symptoms, not prevention of symptoms.
3. The abstract, discussion section, and figure 7B describe the effect of Lp082 on the animal model through the groups: biological barrier, chemical barrier, mechanical barrier, and immune barrier. I don't recommend subdividing "biological, chemical, and mechanical barrier", as everything you are referring to is biological, chemical, and mechanical in nature. Rather, use categories akin to "microbiota/microbiome alterations, barrier function improvements, and inflammation reduction."
4. In general, the abstract could be re-written to describe the results from a higher level, rather than just listing the altered genes. Close the abstract with a statement connecting the paper results to the broader scientific field.
5. As written, lines 72-73 suggest Yucha has resistance to acid and bile salts, but I assume that the authors mean Lp082 is resistant. Re-wording the sentence and adding a clarification on what point the authors are trying to make about acid and bile salt resistance would help alleviate the confusion here.
6. Referring to lines 77-92: The authors interchange physiological results with techniques as if they are the same things. Before describing the specific things you were evaluating, describe what you were looking for at a high level. Then separate physiological indicators from methods (e.g., rather than say, "evaluated physiological indexes and shotgun metagenomic sequencing," use language like "evaluated inflammation, microbial community composition and activity...using ELISA, immunohistochemistry, metagenomic sequencing, and RNA-seq."
7. Potentially incorrect information: Lines 97-98 days and scores do not line up with the data reported in figure 1B.
8. Abbreviations should be described in the text as they arise, not in an additional section at the end of the paper (page 20).
9. After revising the manuscript, a thorough and detailed assessment and correction of sentence structure would improve the readability of the paper dramatically.
10. Abbreviations, capitalization, italics, and spacing are inconsistent throughout and should be fixed for a final draft. E.g. Lp082(most commonly used in the draft)/LP082 (lines 78-79) or HNU082 (correct)/HNU082 (line 23).
11. Review your usage of "prove" in your manuscript (notably in the discussion section) as the experiments presented provide largely correlative data.

Reviewer #2 (Public repository details (Required)):

metagenomics sequencing and metabolome data are needed to deposit at a repository.

Reviewer #2 (Comments for the Author):

The manuscript aimed to demonstrate the beneficial roles and elucidate the mechanisms of Lp082 on treatment of UC. Study on specific probiotic strain is demanding, and this manuscript is timely and the knowledge obtained from this study would enrich and broaden our understanding on probiotics. However, this manuscript does need MAJOR revision before consideration for acceptance.

Major comments:

1. Authors claim that "we chose LP082 to study the mechanism of probiotics in preventing UC", however, the animal was treated with various reagents followed by DSS challenge. Please explain how this setting could serve well for assessing the effects of probiotics on prevention UC? Authors should discriminate the difference between "prevention" and "treatment", and pay more attention for accuracy of wording.
2. Basically only one biological repeat was conducted in this study. At least two biological repeats are acceptable for this purpose. Please repeat one more animal assay during next round of revision.
3. Please improve layouts of figures, and pay attention to size, location of symbols.
4. Please improve the language and grammar.
5. Please provide the H&E staining results for entire swiss roll in figure 2.
6. Authors claim that "that LP082 could improve UC by regulating gut microbiota, intestinal mucosal barrier, inflammatory pathways and neutrophil infiltration", please provide direct evidence to support Lp082 effects on "mucosal barrier". Manuscript shows the transcriptome data, however, transcriptome analysis on host genes are far away from real expression and function.

Minor comments:

1. Please provide line numbering.
2. Figure 1a depicted the study design and methodology, which might be better to merge into M&M part.

3. Information of study design and methodology are not appropriate present in Results section. The tables or figures should be displayed at a consecutive and sequential order. In current version figure S1b appeared ahead of S1a.

Staff Comments:

### **Preparing Revision Guidelines**

To submit your modified manuscript, log onto the eJP submission site at <https://spectrum.msubmit.net/cgi-bin/main.plex>. Go to Author Tasks and click the appropriate manuscript title to begin the revision process. The information that you entered when you first submitted the paper will be displayed. Please update the information as necessary. Here are a few examples of required updates that authors must address:

- Point-by-point responses to the issues raised by the reviewers in a file named "Response to Reviewers," NOT IN YOUR COVER LETTER.
- Upload a compare copy of the manuscript (without figures) as a "Marked-Up Manuscript" file.
- Each figure must be uploaded as a separate file, and any multipanel figures must be assembled into one file.
- Manuscript: A .DOC version of the revised manuscript
- Figures: Editable, high-resolution, individual figure files are required at revision, TIFF or EPS files are preferred

For complete guidelines on revision requirements, please see the journal Submission and Review Process requirements at <https://journals.asm.org/journal/Spectrum/submission-review-process>. **Submissions of a paper that does not conform to Microbiology Spectrum guidelines will delay acceptance of your manuscript. "**

Please return the manuscript within 60 days; if you cannot complete the modification within this time period, please contact me. If you do not wish to modify the manuscript and prefer to submit it to another journal, please notify me of your decision immediately so that the manuscript may be formally withdrawn from consideration by Microbiology Spectrum.

If your manuscript is accepted for publication, you will be contacted separately about payment when the proofs are issued; please follow the instructions in that e-mail. Arrangements for payment must be made before your article is published. For a complete list of **Publication Fees**, including supplemental material costs, please visit our [website](#).

Corresponding authors may [join or renew ASM membership](#) to obtain discounts on publication fees. Need to upgrade your membership level? Please contact Customer Service at [Service@asmusa.org](mailto:Service@asmusa.org).

Thank you for submitting your paper to Microbiology Spectrum.

### Article summary and impression:

In the article Spectrum01651-22, the authors seek to describe the impact of supplementation of the food-derived bacterial strain *Lactiplantibacillus plantarum* HNU082 (Lp082) on the commonly used DSS-induced IBD model in C57BL/6J adult male mice with otherwise normal microbiota and diet. The authors induce inflammation with DSS supplementation in animal water, stop DSS supplementation, and then add either Lp082 or the compound SASP (although the rationale for using SASP is not provided, I assume this is a positive control for alleviation of DSS induced inflammation) to evaluate Lp082 impacts on DSS treated mice. The authors perform a number of analyses in an attempt to provide a comprehensive assessment of the impact of Lp082 treatment on DSS treated mice including the following: assessment of 1) animal behavior, 2) immune organ weight, 3) serum inflammatory cytokines, 4) colon structure and histopathology and stool formation, 5) colonic mucin and tight junction integrity, 6) microbial taxa changes and abundance, 7) SCFA acid content, 8) host epithelial transcriptional responses, as well as an attempt to connect microbiome changes to host physiology through correlation modeling. If presented accurately and completely, such a compilation is a useful addition to the scientific community and would provide a greater understanding of the impact of *Lactiplantibacillus* on colitis in healthy mouse models. However, the current version of the manuscript has a number of shortcomings, many of which are summarized below. Overall, the text and figures are confusing to follow as key information required to accurately assess the data and author conclusions has been left out. Information omission begins at the beginning of the paper and builds to where it's difficult to assess the content and accuracy of subsequent data.

### Preface to the following comments:

The manuscript does not use page numbers and line numbers. To review this document, I exported the pdf to word and refer to the title page as page 1, with the first line of the title being line 1.

### Major points:

1. Conditions used in figure 3A-D are inadequately described, such that I cannot sufficiently assess sample timing, sample size, comparisons made, and biological meaning. A primary contributor to this is a lack of a clear description on what M\_A-M\_D and T\_A-T\_D are and how the figures relate to sample timing. This makes it hard to assess other data in the manuscript, including overall conclusions that assess microbiome impact on the host response, which is a primary conclusion that the authors try to address.
2. Although Lp082 probiotic introduction is the primary study intervention, the authors do not mention or discuss Lp082 presence in the stool and its own genomic and metabolic contributions to the host response and the SCFA content. There is a label on Figure 3D that says "Lactobacillus plantarum" but it is not discussed. I'd like to see specific Lp082 evaluation and discussion in their metagenome or via another sampling method (like stool qPCR if samples still exist) that indicates the abundance of Lp082 at the times that they sampled in Figure 3 and preferably discussed in light of the experiments and data discussed in Figures 4-6.

3. The Results section “The regulatory roles of SCFAs” and Figure 4 appear to be among the weaker sections in the paper. The figures are not well described, making it difficult to understand the graphs and interpret the data (specific points made below in “minor points”). Lines 172-175 claim “the contents of acetic acid, propionic acid, butyric acid were significantly decreased in the DSS group but significantly increased in the Lp082 group ( $p < 0.05$ ) (Fig. 4b),” but this information does not match the data in Fig. 4b. Fig. 4b shows that the cecal levels of all five evaluated SCFAs are lower than the control in DSS, Lp082, and SASP. Additionally, none of the five SCFAs are higher in Lp082 cecal contents than DSS, and in most cases, the five SCFAs appear lower in Lp082 than DSS. Thus, Fig 4b contradicts their claim that SCFAs improve host outcomes in response to Lp082 treatment after DSS. This is further reiterated by the rather small fold-change increase in the two pathways they indicate promote SCFA production in Lp082 “*the fermentation of pyruvate to propionate I and the fermentation of pyruvate to acetate and lactate II*” in figure 4A. The authors’ conclusion that Lp082 promotes SCFA production is heavily leveraged in the discussion section, but is not well supported in their data.
4. The authors attempt to model microbial impact on the host using the bacterial metagenome and a host transcriptional analysis. This comparison would be better made if there was a microbial metatranscriptome/proteome included in this paper to support the microbial genomic data. In the absence of this, an evaluation of Lp082 itself in the host, and a weak finding on SCFA changes in response to Lp082, I find the correlations reported in figure 7 to be more speculative rather than well supported by the manuscript.
5. I’d like to see an analysis or discussion of the genes in Figure 6D for Lp082. The authors indicate that these genes in 6D are upregulated in DSS and some are pro-inflammatory. I’d like to know if Lp082 treatment suppresses these genes when compared to DSS alone.
6. Other missing information that should be addressed in the manuscript:
  - a. Rationale:
    - I. Why was SASP used?
    - II. Why was Lp082 used specifically?
  - b. Experimental design, conditions, methods:
    - I. Fig S1B does not adequately describe mouse behavior as it’s a single non-descriptive image of each mouse.
  - c. Timing of experiments: After line 101, the sampling times of most experiments are omitted or inadequately described.
  - d. Sample sizes: Sample sizes and number of repeats are omitted. In most cases, the specific datapoints in figures are not well described as to what they are measuring.
  - e. Statistics:
    - a. Only one statistical test is indicated in the paper, Wilcoxin signed rank test, line 546 in the methods. Adding the test run to each figure legend would be appropriate and helpful.
    - b. Conditions statistical tests being used on are not obvious, in part due to the lack of descriptions on sample sizes and replicates.



### Minor points:

#### 1. Missing information that should be addressed:

##### a. Rationale:

- I. The introduction provides weak descriptions and evidence for use of a probiotic in general to treat UC and Lp082 specifically. The introduction would benefit from further elaboration on what is known about probiotic treatment of UC and indicate what is or isn't known about Lp082 usage in UC specifically rather than using general "probiotics" references. Along with this, lines 55-59 are confusing as written, but this may be addressed when more information is added about those two points.
- II. The intro (starting at line 62) provides weak background on data for SCFA alleviation of IBD. Citing work and adding text of SCFA impact of IBD (preferably UC and action through immune cells) would be helpful.

##### b. Impact:

- I. Referencing lines 94-115: No text is provided to indicate what the alterations in water intake, food intake, body weight, DAI, neurological responses, immune organ index, spleen and colon color and structure, hyperemia, and feces structure mean in the context of disease in DSS or in the Lp082 treated animals. This is not addressed elsewhere in the paper and would help the reader understand the impact of your results.
- II. Lines 125-145: Text here would benefit from at least a little description on what this data means at this point in the writing. E.g. what does MUC2 loss and ZOI abundance suggest about Lp082 effects?

##### c. Methods:

- I. Scoring: Since understanding the scoring system used is important to understanding the data, further describing the numbering and what that means would help the reader understand the severity of the DSS model and the subsequent relief without looking up the methods reference (either in the figure legends (Figure 1B) or in the methods (see lines 480-481 where the modifications to DAI are not indicated). DAI and immune organ index should be described at some level in the results and figure legends as well so the reader knows what the data is describing without the methods.)
- II. How was "surface density" quantified? Line 144, figure 2F-G.
- III. Indicate the specific diet provided to the mice (line 459).
- IV. Elaborate on what you mean by "mouse colon samples" on line 537 for RNA-seq.

##### d. Results structure:

- I. The experiments, including the rationale, the samples, and the conditions, should be described at some level prior to discussing the results in the Results text so the readers know what the results are referencing.
- II. Brief overall conclusions should be provided in the Results text to continue engaging the reader and leading them along your thought process. This can be partially addressed by moving text from the

Discussion section to the Results. E.g. lines 302-306 can be moved to the results section where diversity is discussed.

e. Figures:

I. Figure 1:

Fig 1A – the arrows make it look like PBS only led to weight and colon assessment, probiotics to immune indices, SASP to sequencing.

Collapsing the arrows would address this.

Fig 1B – what's being compared for the stats is not well described

Fig 1C – the bars for stats are shifted (also make sure the lines are the same point thickness for stats in each figure)

Fig 1D – “molding ending” is not described in the text. Rephrase or define. Also decrease the numbers in the X axis as they are too condensed. The title “duration of probiotic intervention (day)” is an incorrect title as this figure shows duration of the entire experiment, including pre-treatment with DSS before probiotics.

Fig 1E – there's no Y-axis label and the datapoints are not described

II. Figure 2:

Fig 2A – you might try to line up your red boxes better so they better represent the blow ups (and make straighter red lines).

Fig 2B – add microscopy information for the antibody stains in the legend and/or the methods section. Although the staining method cites another paper, it's best to include antibody information in the methods section. MUC2, ZO-1, and the blue marker are not labeled in the figure and in the figure legend.

Fig 2C – the y axis is missing a metric

Fig 2f-g – the y axes are missing metrics (as noted above, the method to define these numbers is not stated).

III. Figure 3:

Fig 3A-C groupings not labeled as indicated above

Fig 3D – The meaning of the red highlighting is not indicated in the figure legend. No information is provided about the tree, including what it represents and what the colors indicate. The heat map values are not described – what is being compared and what does a value of zero mean?

IV. Figure 4:

Fig. 4A – It is not entirely clear where this data comes from. My assumption was the metagenome, but the Acetic acid sub section has me unsure. Describe this figure more, taking care to describe what the acetic acid subsection is evaluating.

Fig. 4C-D – A description of the tree components is missing. Describe the correlation analysis more in the text and figure legend.

V. Figure 5: I think this entire figure would be best placed in the supplement as it's really just a sub-point of the contents of figure 6 (but it won't fit in figure 6). You might also remove “distribution” from the title and legend as this suggests tissue spatial information but is not needed.

- VI. Figure 6: Overall, the less color you use, the clearer this figure will be.  
Fig 6A-C: I recommend condensing as Fig 6A. Describe what gene ratio is in the figure legend.  
Fig 6D-F: I recommend condensing as Fig 6B.  
Fig 6G-J: I recommend condensing as Fig 6C. I and j legends are swapped. Describe ifcSE in the legend.
2. The authors confuse whether they are studying Lp082 prevention or treatment of colitis by using verbiage referring to “prevention” and “treatment” interchangeably. This makes it difficult to track what the authors are trying to accomplish (for example, line 60 says “relieving”, lines 76 and 87-88 say “prevention”). Because the authors state that the colitis inducer (DSS) is administered at the time of treatment (Lp082) in the beginning of the Results to evaluate prevention (line 87), but Figure 1A shows that Lp082 is being added at day 8 (so not at the time of induction), I cannot assess which is being studied: Lp082 1) treatment or 2) prevention of UC. My best assumption is that the methods section is correct, and the methods says that DSS is used prior to addition of Lp082, and thus the authors are studying Lp082 relief of colitis. Thus, the language in the paper should be altered to indicate that Lp082 was administered after DSS induced colitis and observed effects are Lp082 alleviation of symptoms, not prevention of symptoms.
  3. The abstract, discussion section, and figure 7B describe the effect of Lp082 on the animal model through the groups: biological barrier, chemical barrier, mechanical barrier, and immune barrier. I don’t recommend subdividing “biological, chemical, and mechanical barrier”, as everything you are referring to is biological, chemical, and mechanical in nature. Rather, use categories akin to “microbiota/microbiome alterations, barrier function improvements, and inflammation reduction.”
  4. In general, the abstract could be re-written to describe the results from a higher level, rather than just listing the altered genes. Close the abstract with a statement connecting the paper results to the broader scientific field.
  5. As written, lines 72-73 suggest Yucha has resistance to acid and bile salts, but I assume that the authors mean Lp082 is resistant. Re-wording the sentence and adding a clarification on what point the authors are trying to make about acid and bile salt resistance would help alleviate the confusion here.
  6. Referring to lines 77-92: The authors interchange physiological results with techniques as if they are the same things. Before describing the specific things you were evaluating, describe what you were looking for at a high level. Then separate physiological indicators from methods (e.g., rather than say, “evaluated physiological indexes and shotgun metagenomic sequencing,” use language like “evaluated inflammation, microbial community composition and activity...using ELISA, immunohistochemistry, metagenomic sequencing, and RNA-seq.”
  7. Potentially incorrect information: Lines 97-98 days and scores do not line up with the data reported in figure 1B.
  8. Abbreviations should be described in the text as they arise, not in an additional section at the end of the paper (page 20).

9. After revising the manuscript, a thorough and detailed assessment and correction of sentence structure would improve the readability of the paper dramatically.
10. Abbreviations, capitalization, italics, and spacing are inconsistent throughout and should be fixed for a final draft. E.g. Lp082 (most commonly used in the draft)/LP082 (lines 78-79) or HNU082 (correct)/*HNU082* (line 23).
11. Review your usage of “prove” in your manuscript (notably in the discussion section) as the experiments presented provide largely correlative data.

1 **Manuscript No.: Spectrum 01651-22**  
2 **Title: Probiotics (*Lactobacillus plantarum* HNU082) supplementation relieves**  
3 **ulcerative colitis by affecting intestinal barrier functions, immunity-related genes**  
4 **expression, gut microbiota, and metabolic pathways in mice.**

5 **Dear Dr. Xiaoyu Tang,**

6 On behalf of my co-authors, I thank you very much for allowing us to revise our  
7 manuscript. We appreciate the time and effort that you and the reviewers dedicated to  
8 providing feedback on our manuscript and are grateful for the insightful comments on  
9 and valuable improvements to our manuscript. We have discussed reviewer's  
10 comments carefully and revised the manuscript taking all the comments positively.  
11 All revisions in the manuscript have been highlighted in yellow. Please find the  
12 point-to-point responses to reviewers' comments in the following text. We thoroughly  
13 double-checked the manuscript. In addition, the revised manuscript with tracked  
14 changes is also uploaded as "Marked Up Manuscript" files.

15 The sequence data reported in this paper have been deposited in the NCBI  
16 database (metagenomic sequencing data and transcriptome sequencing  
17 data:PRJNA812272). As is customary, our data will be made public after the article is  
18 received.

19  
20 We would like to have this revised manuscript considered for publication in  
21 "*Microbiology Spectrum*." We deeply appreciate your consideration of our manuscript.  
22 If you have any queries, please don't hesitate to contact us at the following e-mail  
23 address.

24  
25 We would like to express our great appreciation again to you and the reviewers for  
26 their comments on our paper. We are looking forward to hearing from you.

27  
28 Sincerely,  
29 Jiachao Zhang

30 Yours sincerely,  
31 E-mail: Jiachao Zhang<sup>1\*</sup>, zhjch321123@163.com  
32 College of Food Science and Engineering, Hainan University, Haikou 570228, China

33

34 **Reviewer #1:**

35 Reviewer #1 (Public repository details (Required)):

36 Metagenome and transcriptome raw data

37 **Response:** We are very sorry for our negligence of metagenome and transcriptome  
38 raw data. We have uploaded the metagenomic and transcriptome raw data, and the  
39 modifications in the manuscript have been highlighted. (Page 27, Line: 790-792)

40 The sequence data reported in this paper have been deposited in the NCBI  
41 database (metagenomic sequencing data and transcriptome sequencing  
42 data:PRJNA812272).

43 As is customary, our data will be made public after the article is received.

44

45 Reviewer #1 (Comments for the Author):

46 Article summary and impression:

47 In the article Spectrum 01651-22, the authors seek to describe the impact of  
48 supplementation of the food-derived bacterial strain *lactobacillus plantarum* HNU082  
49 (Lp082) on the commonly used DSS-induced IBD model in C57BL/6J adult male  
50 mice with otherwise normal microbiota and diet. The authors induce inflammation  
51 with DSS supplementation in animal water, stop DSS supplementation, and then add  
52 either Lp082 or the compound SASP (although the rationale for using SASP is not  
53 provided, I assume this is a positive control for alleviation of DSS induced  
54 inflammation) to evaluate Lp082 impacts on DSS treated mice. The authors perform a  
55 number of analyses in an attempt to provide a comprehensive assessment of the  
56 impact of Lp082 treatment on DSS treated mice including the following: assessment  
57 of 1) animal behavior, 2) immune organ weight, 3) serum inflammatory cytokines, 4)

58 colon structure and histopathology and stool formation, 5) colonic mucin and tight  
59 junction integrity, 6) microbial taxa changes and abundance, 7) SCFAs acid content, 8)  
60 host epithelial transcriptional responses, as well as an attempt to connect microbiome  
61 changes to host physiology through correlation modeling. If presented accurately and  
62 completely, such a compilation is a useful addition to the scientific community and  
63 would provide a greater understanding of the impact of *Lactoplantibacillus* on colitis  
64 in healthy mouse models. However, the current version of the manuscript has a  
65 number of shortcomings, many of which are summarized below. Overall, the text and  
66 figures are confusing to follow as key information required to accurately assess the  
67 data and author conclusions has been left out. Information omission begins at the  
68 beginning of the paper and builds to where it's difficult to assess the content and  
69 accuracy of subsequent data.

70 **Response:** We appreciate the time and effort you dedicated to providing feedback on  
71 our manuscript and are grateful for the insightful comments and valuable  
72 improvements to our manuscript. We have discussed your comments carefully, and we  
73 sincerely accept the suggestions. Your comments provided valuable insights to refine  
74 its contents and analysis. In this document, we try to address the issues raised as best  
75 as possible. All revisions in the manuscript have been highlighted in yellow. A list of  
76 changes to the manuscript has been attached, and you can kindly find the  
77 point-to-point responses to your comments in the following text.

78

79 Preface to the following comments:

80 The manuscript does not use page numbers and line numbers. To review this  
81 document, I exported the pdf to word and refer to the title page as page 1, with the  
82 first line of the title being line 1.

83 **Response:** We appreciate your helpful comments. It was a mistake. We have added  
84 the page number and line number to the manuscript now. The title page is also called  
85 page 1, and the first line of the title is line 1.

86

87 Major points:

88 1. Conditions used in figure 3A-D are inadequately described, such that I cannot  
89 sufficiently assess sample timing, sample size, comparisons made, and biological  
90 meaning. A primary contributor to this is a lack of a clear description on what  
91 M\_A-M\_D and T\_A-T\_D are and how the figures relate to sample timing. This  
92 makes it hard to assess other data in the manuscript, including overall conclusions that  
93 assess microbiome impact on the host response, which is a primary conclusion that  
94 the authors try to address.

95 **Response:** We are extremely grateful to the you for pointing out this problem. We are  
96 very sorry for the inadequacy of the condition description. We have added the **Fig. S3**  
97 to describe the sampling time and grouping of metagenomics sequencing. In addition,  
98 we provide supplementary descriptions of all sample times, sample sizes, and  
99 biological significance in the materials and methods and results sections, and  
100 modifications in the manuscript are highlighted in yellow. A detailed description of  
101 **Fig. S3** has been added to Supplemental materia. (Page 2, Line: 22-33)

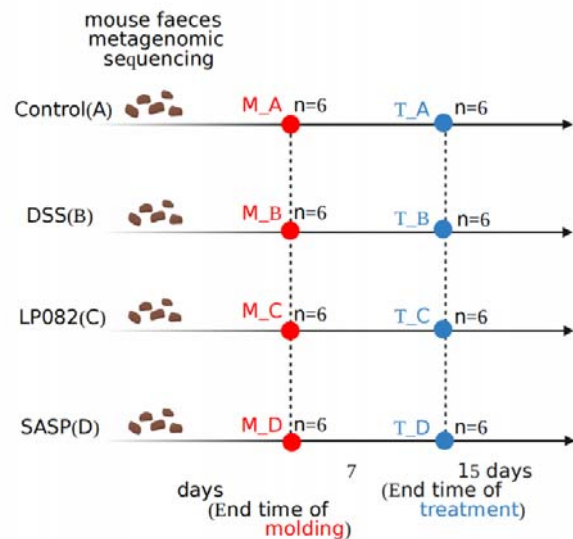

102

103 **SUPPLEMENTARY FIGURE LEGENDS**

104 **Fig. S3**

105 (a) Timepoints and grouping of mouse metagenomic sequencing

106 M means the modeling period, T means the treatment period. Respectively, A, B, C



107 and D group mean 7 days normal water (ultrapure water), DSS, Lp082 and SASP  
108 treatment after 7 days DSS gavage.

109 M-A means A group represents the control group on the 7th day of DSS  
110 modeling, M-B represents the DSS group on the 7th day of DSS modeling, M-C  
111 represents the Lp082 group on the 7th day of DSS modeling, M-D represents the  
112 SASP on the 7th day of DSS treatment Group.

113 T-A means treating-A group represents the control group at the end of the  
114 treatment, T-B represents the DSS group at the end of the treatment, T-C represents  
115 the Lp082 group at the end of the treatment, and T-D represents the SASP group at the  
116 end of the treatment.

117

118 As shown above, we collected mice fecal samples from group A (Control,  $n=6$ ),  
119 group B (DSS,  $n=6$ ), group C (Lp082,  $n=6$ ) and group D (SASP,  $n=6$ ) on days 7 and  
120 15 for metagenomic sequencing. On days 1-7, mice in the group B, group C and  
121 group D drank DSS-containing water freely, the mice in the group A drank normal  
122 water (ultrapure water). On days 8-15, group B, C and D mice stopped drinking DSS  
123 water, Mice in groups A and B were gavaged with PBS water, mice in group C were  
124 gavaged in PBS water and Lp082, and mice in group D were gavaged in PBS water  
125 and SASP. The 7th day was the end of DSS modeling and the 15th day was the end of  
126 Lp082 and SASP treatment, so we chose to take samples from the two key time points  
127 for sequencing to observe the effect of DSS, Lp082 and SASP on the gut microbiome.  
128 We are grateful for the suggestion.

129

130 2. Although Lp082 probiotic introduction is the primary study intervention, the  
131 authors do not mention or discuss Lp082 presence in the stool and its own genomic  
132 and metabolic contributions to the host response and the SCFAs content. There is a  
133 label on Figure 3D that says "*Lactobacillus plantarum*" but it is not discussed. I'd like  
134 to see specific Lp082 evaluation and discussion in their metagenome or via another  
135 sampling method (like stool qPCR if samples still exist) that indicates the abundance  
136 of Lp082 at the times that they sampled in Figure 3 and preferably discussed in light

137 of the experiments and data discussed in Figures 4-6.

138 **Response:** We appreciate your valuable and helpful comment. Previous studies [1],  
139 have shown that the abundance of *lactobacillus plantarum* in mice was 0 [2], and it  
140 was also found in our experiment (during modeling period, the abundance of  
141 *lactobacillus plantarum* in control group (M-A), DSS group (M-B), Lp082 group  
142 (M-C) and SASP group (M-D) was 0 , and during the treatment period, the abundance  
143 of *lactobacillus plantarum* in the control group (T-A), DSS group (T-B) and SASP  
144 group (T-D) was 0.), but we found that the abundance of *lactobacillus plantarum*  
145 increased in the Lp082 group (T-C) only after *lactobacillus plantarum* HNU082  
146 (Lp082) treatment. This is consistent with Wang et al [3] and Huang et al [4] that  
147 probiotic Lp082 can colonize the mouse gut. Therefore, in our experiment, we can  
148 infer that the change in *lactobacillus plantarum* was due to the probiotic Lp082  
149 intake.

150 Added discussion (Page 10, Line: 287-295)

151 Next, we conducted a correlation analysis between Lp082 (*lactobacillus*  
152 *plantarum*) and SCFAs, and found that Lp082 (*lactobacillus plantarum*) was strongly  
153 positively correlated with SCFAs (acetic acid, propionic acid, butyric acid) (**Fig. 4c**),  
154 the correlation results suggested that Lp082 can increase the content of SCFAs. The  
155 above results inspired us to further explore the relationship between Lp082 and  
156 SCFAs, and we further analyzed the bacterial species and metabolic pathways  
157 associated with SCFAs. Further metagenomic data provided support for our above  
158 speculation. Combined with metagenomic data, the species composition of mice gut  
159 microbiota was further analyzed. The results showed that the relative abundance of  
160 some special bacteria increased in the Lp082 group, such as, *lactobacillus plantarum*,  
161 *Bifidobacterium pseudolongum*, *Akkermansia muciniphila*, *Bacteroides ovatus*,  
162 *Parabacteroides distasonis*, *Lactobacillus reuteri*, *Anaerotruncus sp G3 2012* (these  
163 bacteria are highlighted in red in **Fig. 3d** ), all of which can metabolize produces the  
164 SCFAs [5].

165 Subsequently, we further analyzed the metabolic pathways of gut microbiota in  
166 mice. Results of differential metabolic pathways showed that the abundance of gut

167 microbiota metabolic pathways related SCFAs production decreased in DSS group but  
168 increased in Lp082 group (**Fig. 4a**). We infer that Lp082 can promote the content of  
169 SCFAs (acetate, propionate and butyrate) by adjust three metabolic pathways,  
170 including Pyruvate fermentation to Propanoate I, Pyruvate fermentation to acetate and  
171 lactate II, Acetyl CoA fermentation to Butanoate (**Fig. 4a**).

172 To prove the above findings, we further used gas chromatography-mass  
173 spectrometry (GC-MS) to detect the content of SCFAs. Compared with control group,  
174 the contents of butyric acid, valeric acid, acetic acid, propionic acid and isobutyric  
175 acid were significantly decreased after ingestion of DSS ( $P < 0.01$ ). Compared with  
176 DSS group, the contents of butyric acid, acetic acid, propionic acid and isobutyric  
177 acid were extremely significant increased after ingestion of Lp082 ( $P < 0.01$ ). This  
178 confirmed our previous hypothesis based on the correlation that Lp082 intake would  
179 increase SCFAs levels (**Fig. 4b**). Based on the above results, we speculate that Lp082  
180 increase the content of SCFAs by affecting the abundance of SCFAs-producing  
181 microbes, as well as the metabolic pathways of SCFAs-producing microbes.

## 182 Reference

- 183 1. Pan Y, Ning Y, Hu J, Wang Z, Chen X, Zhao X. The Preventive Effect of  
184 *lactobacillus plantarum* ZS62 on DSS-Induced IBD by Regulating Oxidative Stress  
185 and the Immune Response. *Oxid Med Cell Longev*. 2021;2021:9416794; doi:  
186 10.1155/2021/9416794.
- 187 2. Shao Y, Huo D, Peng Q, Pan Y, Jiang S, Liu B, et al. *lactobacillus plantarum*  
188 HNU082-derived improvements in the intestinal microbiome prevent the development  
189 of hyperlipidaemia. *Food & Function*. 2017;8(12):4508-16; doi: 10.1039/c7fo00902j.
- 190 3. Wang Y, li J, Ma C, Jiang S, Li C, Zhang L, et al. *lactobacillus plantarum*  
191 HNU082 inhibited the growth of *Fusobacterium nucleatum* and alleviated the  
192 inflammatory response introduced by *F. nucleatum* invasion. *Food & Function*.  
193 2021;12(21):10728-40; doi: 10.1039/d1fo01388b.
- 194 4. Huang S, Jiang S, Huo D, Allaband C, Estaki M, Cantu V, et al. Candidate  
195 probiotic *lactobacillus plantarum* HNU082 rapidly and convergently evolves within  
196 human, mice, and zebrafish gut but differentially influences the resident microbiome.

197 [Microbiome. 2021;9\(1\); doi: 10.1186/s40168-021-01102-0.](#)

198 5. Y. W. Cheng, J. M. Liu and Z. X. Ling, Short-chain fatty acids-producing  
199 probiotics: A novel source of psychobiotics, *Critical Reviews in Food Science and*  
200 *Nutrition*, DOI: 10.1080/10408398.2021.1920884.

201

202 3. The Results section "The regulatory roles of SCFAs" and Figure 4 appear to be  
203 among the weaker sections in the paper. The figures are not well described, making it  
204 difficult to understand the graphs and interpret the data (specific points made below in  
205 "minor points"). Lines 172-175 claim "the contents of acetic acid, propionic acid,  
206 butyric acid were significantly decreased in the DSS group but significantly increased  
207 in the Lp082 group ( $p < 0.05$ ) (Fig. 4b)," but this information does not match the data  
208 in Fig. 4b. Fig. 4b shows that the cecal levels of all five evaluated SCFAs are lower  
209 than the control in DSS, Lp082, and SASP. Additionally, none of the five SCFAs are  
210 higher in Lp082 cecal contents than DSS, and in most cases, the five SCFAs appear  
211 lower in Lp082 than DSS. Thus, Fig 4b contradicts their claim that SCFAs improve  
212 host outcomes in response to Lp082 treatment after DSS. This is further reiterated by  
213 the rather small fold-change increase in the two pathways they indicate promote  
214 SCFAs production in Lp082 "the fermentation of pyruvate to propionate I and the  
215 fermentation of pyruvate to acetate and lactate II" in figure 4A. The authors'  
216 conclusion that Lp082 promotes SCFAs production is heavily leveraged in the  
217 discussion section, but is not well supported in their data.

218 **Response:** We apologize for any confusion caused and appreciate the valuable  
219 suggestions. We sincerely thank you for pointing out the inconsistency between the  
220 figure information and the manuscript information. After carefully examining and  
221 comparing of the original drawing data, we found that the grouping in **Fig. 4b** was  
222 wrong. We sincerely apologize for this, and the correct grouping is as follows. In **Fig.**  
223 **4b**, red represents the control group, yellow represents the Lp082 group, blue  
224 represents the SASP group, and green represents the DSS group. The content of  
225 SCFAs described in the original manuscript is based on the correct grouping  
226 mentioned above. We have revised the grouping of **Fig. 4b** and carefully checked all

227 the figures and full text to ensure the consistency of the manuscript and figures. In  
228 addition, we have rewritten the results section "The regulatory roles of SCFAs" and  
229 we have redescribed all panels in **Figure 4** including **Fig. 4a-Fig. 4d**. (Page 10, Line:  
230 286-346). All revisions in the manuscript have been highlighted.

### 231 **The regulatory role of SCFAs**

232 Next, we conducted a correlation analysis between Lp082 (*Lactobacillus*  
233 *plantarum*) and SCFAs, and found that Lp082 (*Lactobacillus plantarum*) was strongly  
234 positively correlated with SCFAs (acetic acid, propionic acid, butyric acid) (**Fig. 4c**),  
235 the correlation results suggested that Lp082 can increase the content of SCFAs. The  
236 above results inspired us to further explore the relationship between Lp082 and  
237 SCFAs, and we further analyzed the bacterial species and metabolic pathways  
238 associated with SCFAs. Further metagenomic data provided support for our above  
239 speculation. Combined with metagenomic data, the species composition of mice gut  
240 microbiota was further analyzed. The results showed that the relative abundance of  
241 some special bacteria increased in the Lp082 group, such as, *Lactobacillus plantarum*,  
242 *Bifidobacterium pseudolongum*, *Akkermansia muciniphila*, *Bacteroides ovatus*,  
243 *Parabacteroides distasonis*, *Lactobacillus reuteri*, *Anaerotruncus sp G3 2012* (these  
244 bacteria are highlighted in red in **Fig. 3d**), all of which can metabolize produces the  
245 SCFAs [1].

246 Subsequently, we further analyzed the metabolic pathways of gut microbiota in  
247 mice. Results of differential metabolic pathways showed that the abundance of gut  
248 microbiota metabolic pathways related SCFAs production decreased in DSS group but  
249 increased in Lp082 group (**Fig. 4a**). We infer that Lp082 can promote the content of  
250 SCFAs (acetate, propionate and butyrate) by adjust three metabolic pathways,  
251 including Pyruvate fermentation to Propanoate I, Pyruvate fermentation to acetate and  
252 lactate II, Acetyl CoA fermentation to Butanoate (**Fig. 4a**).

253 To prove the above findings, we further used gas chromatography-mass  
254 spectrometry (GC-MS) to detect the content of SCFAs. Compared with control group,  
255 the contents of butyric acid, valeric acid, acetic acid, propionic acid and isobutyric  
256 acid were significantly decreased after ingestion of DSS ( $P < 0.01$ ). Compared with

257 DSS group, the contents of butyric acid, acetic acid, propionic acid and isobutyric  
258 acid were extremely significant increased after ingestion of Lp082 ( $P < 0.01$ ). This  
259 confirmed our previous hypothesis based on the correlation that Lp082 intake would  
260 increase SCFAs levels (**Fig. 4b**). Based on the above results, we speculate that Lp082  
261 increase the content of SCFAs by affecting the abundance of SCFAs-producing  
262 microbes, as well as the metabolic pathways of SCFAs-producing microbes.

263 To further understand the role of SCFAs, we performed a Pearson correlation  
264 analysis. The results showed that *helicobacter hepatica*, which was significantly  
265 increased in the DSS group, was strongly negatively correlated with acetic acid,  
266 propionic acid, and butyric acid (**Fig. 4c**). *lactobacillus plantarum*, *Bifidobacterium*  
267 *pseudolongum*, *Akkermansia muciniphila*, *Parabacteroides distasonis*, *Lactobacillus*  
268 *reuteri*, which were significantly increased in Lp082 group showed strong positive  
269 correlation with acetic acid, propionic acid, and butyric acid. *Anaerotruncus sp G3*  
270 *2012* and *Bacteroides ovatus* showed a strong positive correlation with butyric acid  
271 and acetic acid, and a weak positive correlation with propionic acid (**Fig. 4c**). These  
272 SCFAs including acetic acid, propionic acid, and butyric acid were all strong  
273 negatively correlation with the pro-inflammatory factors TNF- $\alpha$ , IL-1 $\beta$ , IFN- $\gamma$ , IL-6,  
274 MPO but strongly positively correlated with the inflammatory suppressor IL-10 (**Fig.**  
275 **4d**). As important products of gut microbiota metabolism, SCFAs have certain  
276 anti-inflammatory effects and play an important role in maintaining normal intestinal  
277 morphology and function. Combined with the results of **Fig. 3d**, **Fig. 4a-4d**, as well  
278 as the improvement of physiological indicators (**Fig. 1b-1d**), pathological indicators  
279 (**Fig. 2a-2g**) and inflammatory factors (**Fig. 1e**) after ingestion of Lp082, we  
280 speculated that Lp082 may alleviate DSS-induced UC by regulating SCFAs through  
281 the following mechanisms (**Fig. S4**). That is, after the ingestion of Lp082, the  
282 abundance of the intestinal microbes of SCFAs-producing increased, which promoted  
283 the content of SCFAs. The SCFAs has the function of promoting the secretion of  
284 inflammatory cytokine and suppressing the secretion of inflammatory factors. The  
285 changes in inflammatory cytokines affect the physiological indicators of mice, which  
286 increases the weight, colon length, drinking water and eating volume of mice, and

287 reduces the DAI score and immune organs index. The changes in inflammatory  
 288 cytokines also affected the pathological indexes of mice, resulting in a decrease in  
 289 histopathological score and an increase in immunofluorescence protein content of  
 290 ZO-1 and MUC-2.

291

292 **Reference**

293 1. Y. W. Cheng, J. M. Liu and Z. X. Ling, Short-chain fatty acids-producing  
 294 probiotics: A novel source of psychobiotics, Critical Reviews in Food Science and  
 295 Nutrition, DOI: 10.1080/10408398.2021.1920884.

296

297

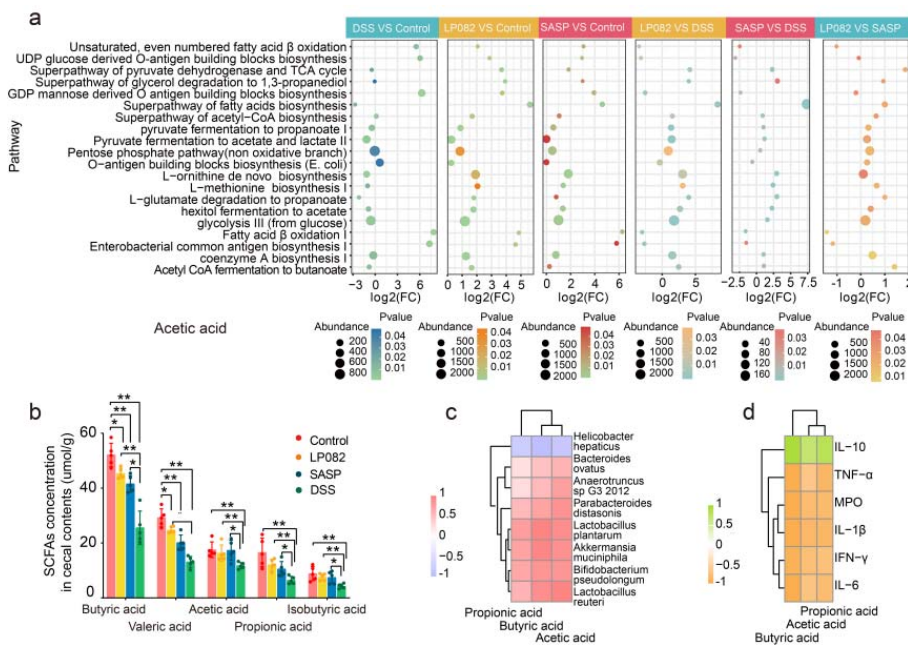

298

299 **Fig. 4**

300 The important role of SCFAs in alleviation of DSS-induced UC.

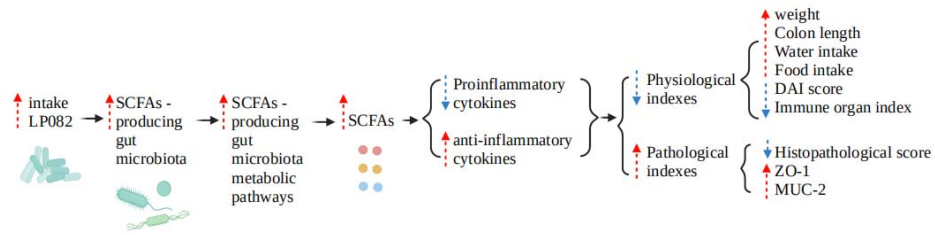

301

302 **Fig. S4**

303 **The underlying mechanism by which Lp082 regulates SCFAs to alleviate UC**

304 4. The authors attempt to model microbial impact on the host using the bacterial  
 305 metagenome and a host transcriptional analysis. This comparison would be better  
 306 made if there was a microbial metatranscriptome/proteome included in this paper to  
 307 support the microbial genomic data. In the absence of this, an evaluation of Lp082  
 308 itself in the host, and a weak finding on SCFAs changes in response to Lp082, I find  
 309 the correlations reported in figure 7 to be more speculative rather than well supported  
 310 by the manuscript.

311 **Response:** We appreciate your valuable and helpful comment. Indeed, it is a pity that  
 312 the microbiome lacks transcriptome, but the absence of a microbial transcriptome in  
 313 the Cordeiro et al. [1] and Wang et al. [2] articles did not affect the demonstration of  
 314 the impact of microorganisms on the host.

315 Previous studies [3], have shown that the abundance of *lactobacillus plantarum*  
 316 in mice was 0 [4], and it was also found in our experiment (during modeling period,  
 317 the abundance of *lactobacillus plantarum* in control group (M-A), DSS group (M-B),  
 318 Lp082 group (M-C) and SASP group (M-D) was 0 , and during the treatment period,  
 319 the abundance of *lactobacillus plantarum* in the control group (T-A), DSS group (T-B)  
 320 and SASP group (T-D) was 0.), but we found that the abundance of *lactobacillus*  
 321 *plantarum* increased in the Lp082 group (T-C) only after *lactobacillus plantarum*  
 322 Lp082 treatment. This is consistent with Wang et al [5] and Huang et al [6] that  
 323 probiotic Lp082 can colonize the mouse gut. Therefore, in our experiment, we can  
 324 infer that the change in *lactobacillus plantarum* was due to the probiotic Lp082  
 325 intake.



326 Added discussion (Page 10, Line: 287-318)

327       Next, we conducted a correlation analysis between Lp082 (*lactobacillus*  
328 *plantarum*) and SCFAs, and found that Lp082 (*lactobacillus plantarum*) was strongly  
329 positively correlated with SCFAs (acetic acid, propionic acid, butyric acid) (**Fig. 4c**),  
330 the correlation results suggested that Lp082 can increase the content of SCFAs. The  
331 above results inspired us to further explore the relationship between Lp082 and  
332 SCFAs, and we further analyzed the bacterial species and metabolic pathways  
333 associated with SCFAs. Further metagenomic data provided support for our above  
334 speculation. Combined with metagenomic data, the species composition of mice gut  
335 microbiota was further analyzed. The results showed that the relative abundance of  
336 some special bacteria increased in the Lp082 group, such as, *lactobacillus plantarum*,  
337 *Bifidobacterium pseudolongum*, *Akkermansia muciniphila*, *Bacteroides ovatus*,  
338 *Parabacteroides distasonis*, *Lactobacillus reuteri*, *Anaerotruncus sp G3 2012* (these  
339 bacteria are highlighted in red in **Fig. 3d** ), all of which can metabolize produces the  
340 SCFAs [7].

341       Subsequently, we further analyzed the metabolic pathways of gut microbiota in  
342 mice. Results of differential metabolic pathways showed that the abundance of gut  
343 microbiota metabolic pathways related SCFAs production decreased in DSS group but  
344 increased in Lp082 group (**Fig. 4a**). We infer that Lp082 can promote the content of  
345 SCFAs (acetate, propionate and butyrate) by adjust three metabolic pathways,  
346 including Pyruvate fermentation to Propanoate I, Pyruvate fermentation to acetate and  
347 lactate II, Acetyl CoA fermentation to Butanoate (**Fig. 4a**).

348       To prove the above findings, we further used gas chromatography-mass  
349 spectrometry (GC-MS) to detect the content of SCFAS. Compared with control group,  
350 the contents of butyric acid, valeric acid, acetic acid, propionic acid and isobutyric  
351 acid were significantly decreased after ingestion of DSS ( $P < 0.01$ ). Compared with  
352 DSS group, the contents of butyric acid, acetic acid, propionic acid and isobutyric  
353 acid were extremely significant increased after ingestion of Lp082 ( $P < 0.01$ ). This  
354 confirmed our previous hypothesis based on the correlation that Lp082 intake would  
355 increase SCFAs levels (**Fig. 4b**). Based on the above results, we speculate that Lp082

356 increase the content of SCFAs by affecting the abundance of SCFAs-producing  
357 microbes, as well as the metabolic pathways of SCFAs-producing microbes.

358 The above evidence is obtained from actual measurements, and the data is  
359 objective and true, which is enough to prove that the increase in SCFAs is indeed  
360 caused by the introduction of Lp082.

361 **Fig. 6a** (original named **Fig. 7a**) is a comprehensive network diagram. We have  
362 performed pearson correlation analysis based on the actual measured data and  
363 simulated possible mechanisms. In **Fig. 6a**, red lines indicate positive correlation,  
364 blue lines indicate negative correlation, and thicker lines indicate stronger correlation.  
365 The purpose of this picture is to combine the possible mechanism diagrams to better  
366 understand the theme of the article, which is the usual method of many [8] articles [9].  
367 **Fig. 6a** does not only analyze the correlation, we have really done a lot of  
368 experiments and verifications in it. First, we studied some basic indicators and found  
369 that Lp082 could not only significantly inhibit the decrease of body weight, water  
370 intake and food intake induced by DSSS in mice, but also significantly inhibit the  
371 increase of DAI and immune organ index induced by DSSS, as well as the decrease of  
372 colon length caused by DSS (**Fig. 1a-1d**). Second, we measured the protein content of  
373 six inflammatory cytokines in mouse serum, and found that Lp082 could significantly  
374 reduce the increase of IL-1 $\beta$ , IL-6, TNF- $\alpha$ , MPO, IFN- $\gamma$  induced by DSS, and increase  
375 the protein content of IL-10 in mice (**Fig. 1e**). Third, we performed HE staining  
376 section experiment and immunofluorescence protein experiment. The results showed  
377 that Lp082 could not only improve the crypt infiltration, goblet cell loss and intestinal  
378 mucosal ulcer induced by DSS, but also could reduce the increase of histopathology  
379 score caused by DSS and reduce the loss of ZO-1 and MUC-2 proteins caused by  
380 DSS (**Fig. 2a-2g**). Fourth, we collected fecal samples on day 7 for metagenomic  
381 sequencing. The results of Shotgun metagenomic data analysis showed that Lp082  
382 could increase  $\alpha$ -diversity and  $\beta$ -diversity, reduce the differences in species  
383 composition, increase the content of beneficial bacteria and inhibit the abundance of  
384 harmful bacteria in mice (**Fig. 3a-3d**). Fifth, we used gas chromatography-mass  
385 spectrometry to determine the content of SCFAs in the intestinal contents of mice, and

386 found that Lp082 could significantly inhibit the reduction of acetic acid, propionic  
387 acid, butyric acid, isobutyric acid and valeric acid induced by DSS, and restore the  
388 content of SCFAs in mice (**Fig. 4b**). Sixth, we sequenced the transcriptome of colon  
389 tissue, and the results showed that Lp082 not only affected gene expression  
390 distribution, but also affected inflammation and cancer-related and KEGG,GO-BP  
391 pathways (**Fig. 5a-5g**). From the above, it can be seen that our correlations are not  
392 unreasonable speculation, but are based on experimental data from a large number of  
393 real measurements. Our data were not less than 6 replicates in each group, and our  
394 data were absolutely reliable . Collectively, our current data are objective and accurate  
395 enough to support our conclusions.

#### 396 **Reference**

- 397 1. Cordeiro BF, Alves JL, Belo GA, Oliveira ER, Braga MP, da Silva SH, et al.  
398 Therapeutic Effects of Probiotic Minas Frescal Cheese on the Attenuation of UC in a  
399 Murine Model. *Frontiers in Microbiology*. 2021;12; doi: 10.3389/fmicb.2021.623920.
- 400 2. Wang J, Ji HF, Wang SX, Liu H, Zhang W, Zhang DY, et al. Probiotic  
401 *lactobacillus plantarum* Promotes Intestinal Barrier Function by Strengthening the  
402 Epithelium and Modulating Gut Microbiota. *Frontiers in Microbiology*. 2018;9; doi:  
403 10.3389/fmicb.2018.01953.
- 404 3. Pan Y, Ning Y, Hu J, Wang Z, Chen X, Zhao X. The Preventive Effect of  
405 *lactobacillus plantarum* ZS62 on DSS-Induced IBD by Regulating Oxidative Stress  
406 and the Immune Response. *Oxid Med Cell Longev*. 2021;2021:9416794; doi:  
407 10.1155/2021/9416794.
- 408 4. Shao Y, Huo D, Peng Q, Pan Y, Jiang S, Liu B, et al. *lactobacillus plantarum*  
409 HNU082-derived improvements in the intestinal microbiome prevent the development  
410 of hyperlipidaemia. *Food & Function*. 2017;8(12):4508-16; doi: 10.1039/c7fo00902j.
- 411 5. Wang Y, li J, Ma C, Jiang S, Li C, Zhang L, et al. *lactobacillus plantarum*  
412 HNU082 inhibited the growth of *Fusobacterium nucleatum* and alleviated the  
413 inflammatory response introduced by *F. nucleatum* invasion. *Food & Function*.  
414 2021;12(21):10728-40; doi: 10.1039/d1fo01388b.
- 415 6. Huang S, Jiang S, Huo D, Allaband C, Estaki M, Cantu V, et al. Candidate

416 probiotic *Lactobacillus plantarum* HNU082 rapidly and convergently evolves within  
417 human, mice, and zebrafish gut but differentially influences the resident microbiome.  
418 *Microbiome*. 2021;9(1); doi: 10.1186/s40168-021-01102-0.

419 7. Y. W. Cheng, J. M. Liu and Z. X. Ling, Short-chain fatty acids-producing  
420 probiotics: A novel source of psychobiotics, *Critical Reviews in Food Science and*  
421 *Nutrition*, DOI: 10.1080/10408398.2021.1920884.

422 8. Ma C, Wasti S, Huang S, Zhang Z, Mishra R, Jiang S, et al. The gut microbiome  
423 stability is altered by probiotic ingestion and improved by the continuous  
424 supplementation of galactooligosaccharide. *Gut Microbes*. 2020;12(1); doi:  
425 10.1080/19490976.2020.1785252.

426 9. Z. P. Gu, Y. J. Zhu, S. M. Jiang, G. H. Xia, C. Li, X. Y. Zhang, J. C. Zhang and X.  
427 R. Shen, Tilapia head glycolipids reduce inflammation by regulating the gut  
428 microbiota in dextran sulphate sodium-induced colitis mice, *Food & Function*, 2020,  
429 11, 3245-3255.

430

431 5. I'd like to see an analysis or discussion of the genes in Figure 6D for Lp082. The  
432 authors indicate that these genes in 6D are upregulated in DSS and some are  
433 pro-inflammatory. I'd like to know if Lp082 treatment suppresses these genes when  
434 compared to DSS alone.

435 **Response:** We are grateful for the suggestion. We have added a more detailed  
436 interpretation regarding analysis and discussion of Lp082 gene. More detailed  
437 statistical analysis was added in the paper. Supplementary Figure **Fig. S6** illustrates  
438 the effect of Lp082 treatment on up-regulated inflammatory genes in the DSS group  
439 in **Fig. 6d**.

440 Our previous analysis idea was as follows: Since the preliminary analysis of  
441 transcriptome data showed that the intake of Lp082 affects the gene expression  
442 distribution (**Fig. 5**), in order to explore whether Lp082 also affects gene enrichment  
443 pathways, we analyzed the GO pathway and KEGG pathway.

444 Since the differentially expressed genes (DEGs) were more enriched in the  
445 biological process (BP) pathway among the three major GO pathway categories (**Fig.**

446 **5a-5c**), and the number of significantly up-regulated genes in Lp082 group is more  
447 than the down-regulated genes compared with the DSS group (**Fig. 5d**), so we  
448 performed further GO-BP analysis on the significantly up-regulated differentially  
449 expressed genes (**Fig. 6d-6f**). Therefore, in **Fig. 6d**, more attention was paid to  
450 inflammatory pathways enriched by up-regulated genes in the DSS group. We added  
451 **Fig. S6** to see the changes of genes enriched in inflammatory pathways in the DSS  
452 group, and their changes in the Lp082 group. We have supplemented **Fig. S6** content  
453 in the article and highlighted it, the supplementary content is as follows (Page 14, line:  
454 385-391):

455 To further observe whether Lp082 treatment would suppress these inflammatory  
456 and cancer genes enriched on inflammatory pathways in the DSS group, we  
457 supplemented Fig. S6. As can be seen from Fig. S6, among the 13 inflammatory genes  
458 or oncogenes that were up-regulated and enriched in the inflammatory pathway in the  
459 DSS group, the following 10 genes were significantly down-regulated in the Lp082  
460 group: IL-1 $\beta$ , IL-1 $\alpha$ , Ereg, IL-1rn, Fga, Ldlr, Dgat2, Mfsd2a, Cdc7, Dbf4 (Fig. S6).

461

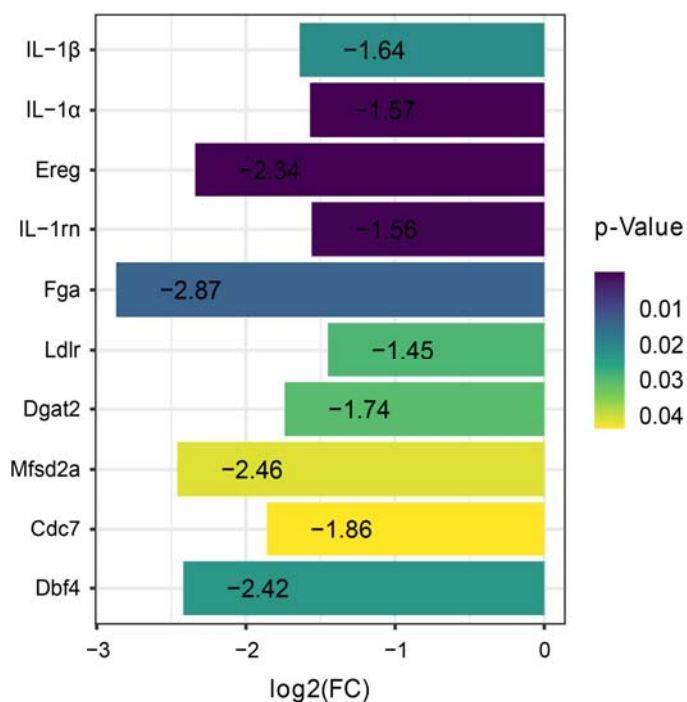

462

463 A supplementary legend to Figure S6 has been added to the supplementary material  
464 (Page 6, line: 51-58)

465 **SUPPLEMENTARY FIGURE LEGENDS**

466 **Fig. S6.** The effect of Lp082 treatment on up-regulated inflammatory genes in the  
467 DSS group in **Fig. 6d**.

468 The 13 inflammatory genes or oncogenes that were up-regulated and enriched in the  
469 inflammatory pathway in the DSS group, the following 10 genes were significantly  
470 down-regulated in the Lp082 group: IL-1 $\beta$ , IL-1 $\alpha$ , Ereg, IL -1rn, Fga, Ldlr, Dgat2,  
471 Mfsd2a, Cdc7, Dbf4.

472 Wilcoxon signed-rank test is used here. Each group had at least 6 biological  
473 replicates.

474

475 2. Other missing information that should be addressed in the manuscript:

476 a. Rationale:

477 I. Why was SASP used?

478 **Response:** Thank you for pointing this out. We have supplemented the description of  
479 SASP, and relevant content has been added to the manuscript now (Page 5, line:  
480 126-132). The details are as follows:

481 Sulfasalazine (SASP) is a commonly used medicine to treat UC at present [1].  
482 Sulfasalazine is hydrolyzed into 5'-aminosalicylic acid and sulfamerydine by  
483 intestinal bacteria when it enters the human intestine. The decomposed 5'  
484 -aminosalicylic acid not only has good anti-inflammatory and antibacterial effects but  
485 also can effectively suppress the outbreak of UC through immunosuppression [2].  
486 Zhipeng Gu [3] used SASP as the positive control group of tilapia head sugar lipids in  
487 the treatment of colitis.

488 Therefore, SASP was selected as the positive control group for Lp082 in the  
489 treatment of UC.

490 **Reference**

- 491 1. Steinhart AH, Hemphill D, Greenberg GR. Sulfasalazine and mesalazine for the  
492 maintenance therapy of Crohn's disease: a meta-analysis. The American journal of  
493 gastroenterology. 1994;89(12):2116-24.
- 494 2. Klotz U, Maier K, Fischer C, Heinkel K. Therapeutic efficacy of sulfasalazine

495 and its metabolites in patients with UC and Crohn's disease. The New England journal  
496 of medicine. 1980;303(26):1499-502; doi: 10.1056/nejm198012253032602.

497 3. Gu ZP, Zhu YJ, Jiang SM, Xia GH, Li C, Zhang XY, et al. Tilapia head  
498 glycolipids reduce inflammation by regulating the gut microbiota in dextran sulphate  
499 sodium-induced colitis mice. Food & Function. 2020;11(4):3245-55; doi:  
500 10.1039/d0fo00116c.

501

502 II. Why was Lp082 used specifically?

503 **Response:** We are grateful for the suggestion. We have added a more detailed  
504 interpretation regarding Lp082. Relevant content has been added to the text (Page 4,  
505 line: 98-111). The revised content is as follows:

506       The strain of *Lactobacillus plantarum* HNU082 (Lp082) was originally isolated  
507 from a traditional fermented food-fish tea of the Li people in Hainan Province,  
508 China ,which has a good safety profile and tolerance to acids and bile salts [1]. The  
509 results of Lp082 whole genome sequencing showed showed that this bacterium has  
510 great potential to develop as a probiotic in terms of physiology and function [2]. In  
511 our previous study, Lp082 not only can enhance the ecological and genetic stability of  
512 the intestinal microbiota [3]. But also can inhibit the growth of *Fusobacterium*  
513 *nucleatum* and reduce the inflammatory response [4]. Previous studies have also  
514 shown that Lp082 exerts a preventive effect on hyperlipidemia through the  
515 modulation of metabolism [5]. In addition, ingestion of Lp082 and supplementation  
516 with prebiotics improved the stability of the intestinal microbiota and reduced the  
517 occurrence of disorders associated with disease. These results invariably demonstrate  
518 the probiotic potential of Lp082. However, the treatment effect of Lp082 on UC has  
519 not been studied.

520       Therefore, we chose Lp082 to study the mechanism of probiotics in treating UC.

521 **Reference**

522 1. Zhang J, Wang X, Huo D, Li W, Hu Q, Xu C, et al. Metagenomic approach  
523 reveals microbial diversity and predictive microbial metabolic pathways in Yucha, a  
524 traditional Li fermented food. Scientific Reports. 2016;6; doi: 10.1038/srep32524.

525 2. Ma C, Wasti S, Huang S, Zhang Z, Mishra R, Jiang S, et al. The gut microbiome  
526 stability is altered by probiotic ingestion and improved by the continuous  
527 supplementation of galactooligosaccharide. *Gut Microbes*. 2020;12(1); doi:  
528 10.1080/19490976.2020.1785252.

529 3. Huang S, Jiang S, Huo D, Allaband C, Estaki M, Cantu V, et al. Candidate  
530 probiotic *Lactiplantibacillus plantarum* HNU082 rapidly and convergently evolves  
531 within human, mice, and zebrafish gut but differentially influences the resident  
532 microbiome. *Microbiome*. 2021;9(1); doi: 10.1186/s40168-021-01102-0.

533 4. Wang Y, li J, Ma C, Jiang S, Li C, Zhang L, et al. *Lactiplantibacillus plantarum*  
534 HNU082 inhibited the growth of *Fusobacterium nucleatum* and alleviated the  
535 inflammatory response introduced by *F. nucleatum* invasion. *Food & Function*.  
536 2021;12(21):10728-40; doi: 10.1039/d1fo01388b.

537 5. Shao Y, Huo D, Peng Q, Pan Y, Jiang S, Liu B, et al. *Lactobacillus plantarum*  
538 HNU082-derived improvements in the intestinal microbiome prevent the development  
539 of hyperlipidaemia. *Food & Function*. 2017;8(12):4508-16; doi: 10.1039/c7fo00902j.

540

541 b. Experimental design, conditions, methods:

542 I. Fig S1B does not adequately describe mouse behavior as it's a single  
543 non-descriptive image of each mouse.

544 **Response:** We are grateful for the suggestion. As suggested by the reviewer, we have  
545 added more details of mouse behavior. Relevant content has been added to the text  
546 (Page 7, line: 185-197). The details are as follows:

547 The mental state of the mice was observed daily, and the results are shown in **Fig.**  
548 **S1 b**. On the 7th day of modeling, mice in the control group were in a normal state,  
549 with normal urine and feces, shiny hair, active spirit, sensitive reaction and increased  
550 body size. However, mice in the B,C and D group had yellow and smelly urine,  
551 difficult defecation, bloody stool, dark and fried hair, slow reaction and easy panic,  
552 arched back, and reduced body size (**Fig. S1 b**). On the last day of treatment (Day 15),  
553 compared with the arched back, retarded response, hematochezia and lethargic in the  
554 DSS group, the mental state of mice in the Lp082 and SASP groups gradually



555 returned to normal, with active spirit, no arched back, no hematochezia and shiny hair  
556 (Fig. S1 b). These results indicated that Lp082 intake could alleviate the symptoms of  
557 depression, crouching and untidy hair of mice in the DSS group in the middle and late  
558 stage of the experiment (Fig. S1 b).

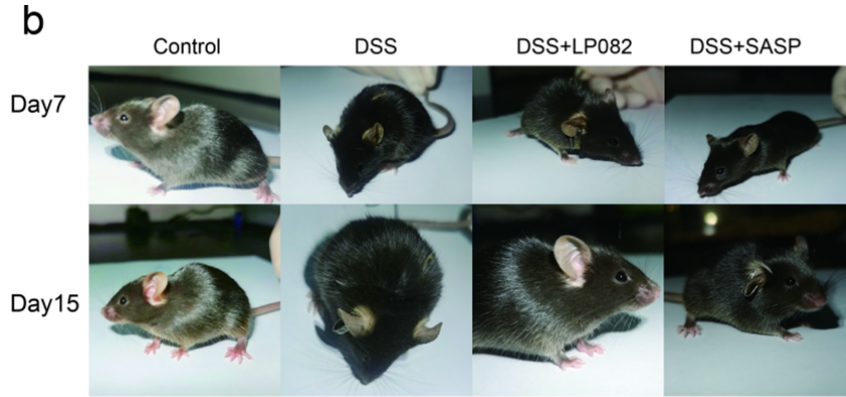

559

**Fig. S1**

560

(b) Mental state of experimental mice.

561

562

563 c. Timing of experiments: After line 101, the sampling times of most experiments are  
564 omitted or inadequately described.

565 **Response:** We appreciate your valuable and helpful comment. It is true that the  
566 sampling times of most experiments are inadequately described. We have rewritten  
567 this section. The rewritten content is more detailed, and the details are as follows:

568

569 After the experiment, the spleen, liver, kidney and colon of 8 mice were selected from  
570 each group for observation and measurement. (Page 6, line: 170-172)

571

572 To further evaluate the effects of Lp082 on inflammatory cytokines in mice with  
573 colitis, serum of 6 mice in each group was randomly collected after the experiment,  
574 and the levels of pro-inflammatory cytokines TNF- $\alpha$ , IL-1 $\beta$ , IFN- $\alpha$ , IL-6, MPO and  
575 anti-inflammatory cytokines IL-10 were detected by ELISA kit. (Page 8, line:  
576 208-213)

577

578 At the end of the experiment, the 1cm portion of the distal colon of 6 mice in each  
579 group was selected randomly for HE staining, and histopathological score and  
580 intestinal wall thickness were further measured ( $n=6$ ). (Page 8, line: 220-224)

581

582 At the end of modeling (day 7 of the experiment), feces of 6 mice in each group were  
583 randomly selected for metagenomic sequencing, and at the end of treatment (day 15  
584 of the experiment), feces of 6 mice in each group were selected for metagenomic  
585 sequencing, to observe the effects of DSS and Lp082 on the intestinal microecology  
586 of mice. (Page 9, line: 258-262)

587

588 To prove the above findings, we further used gas chromatography-mass spectrometry  
589 (GC-MS) to detect the content of SCFAs in cecal contents of 6 mice in each group.  
590 (Page 11, line: 308-309)

591

592 At the end of the experiment, 6 mice from each group were randomly selected for  
593 colon transcriptome sequencing, and the volcanic map was drawn based on the  
594 preliminary gene distribution analysis results. (Page 13, line: 350-352)

595

596 C57BL/6J mice aged 7 weeks were randomly divided into 4 groups: control group  
597 ( $n=8$ ), dextran sulfate sodium (DSS) group ( $n=8$ ), lactobacillus plantarum HNU082  
598 (Lp082) group ( $n=8$ ), and salazosulfapyridine (SASP) group ( $n=8$ ). (Page 23, line:  
599 659-661)

600

601 After the mice were euthanized, the colon length of 8 mice in each group was  
602 measured, the weight of spleen, liver, and kidney of 8 mice in each group was  
603 measured. (Page 23, line: 677-679)

604

605 Before euthanasia, 6 mice were randomly selected from each group, and blood was  
606 collected from the orbital venous plexus by a capillary tube. (Page 24, line: 696-697)

607

608 Finally, the levels of interleukin-1beta (IL-1 $\beta$ ), interleukin-6 (IL-6), interleukin-10  
609 (IL-10), interleukin-17A (IL-17A), interferon-gamma (IFN- $\gamma$ ), Tumor necrosis  
610 factor-alpha (TNF- $\alpha$ ), and Myeloperoxidase (MPO) in the serum of 6 randomly  
611 selected mice from each group were measured using the corresponding ELISA kits  
612 (X-Y Biotechnology, Shanghai, China), as previously described. (Page 24, line:  
613 686-687)

614

615 After euthanasia, the distal 1cm colons of 6 mice in each group were randomly  
616 selected for HE staining section, histopathological score, and intestinal wall thickness  
617 measurement. (Page 24, line: 697-688)

618

619 On the other hand, 8 mice were selected from each group, and their colonic tissues  
620 were labeled with mucin 2 and ZO-1 antibodies, respectively [75], for further  
621 immunofluorescence staining (Servicebio, Wuhan, China). (Page 25, line: 710-712)

622

623 Six mice were randomly selected at two time points (day 7 and day 15 of the  
624 experiment) for metagenomic sequencing of feces. (Page 25, line: 728-7429)

625

626 At the end of the experiment, the cecal contents of 6 mice from each group were  
627 randomly selected for SCFAs determination, and the specific steps were as follows:  
628 (Page 26, line: 742-743)

629

630 At the end of the experiment, colon tissues of 6 mice from each group were randomly  
631 selected for RNA sequencing. (Page 26, line: 757-758)

632

633

634 d. Sample sizes: Sample sizes and number of repeats are omitted. In most cases, the  
635 specific datapoints in figures are not well described as to what they are measuring.

636 **Response:** We appreciate your valuable and helpful comment and we deeply agree  
637 with the opinions of reviewer. According to your helpful suggestions, we have

638 carefully checked the whole paper, and added descriptions of sample size and number  
639 of repeats in material and methods, legends and corresponding places in the article.  
640 The changes have been highlighted in the text in yellow. The rewritten content is  
641 more detailed, and the details are as follows:

642 After the experiment, the spleen, liver, kidney and colon of 8 mice were selected from  
643 each group for observation and measurement. (Page 6, line: 170-172)

644  
645 To further evaluate the effects of Lp082 on inflammatory cytokines in mice with  
646 colitis, serum of 6 mice in each group was randomly collected after the experiment,  
647 and the levels of pro-inflammatory cytokines TNF- $\alpha$ , IL-1 $\beta$ , IFN- $\alpha$ , IL-6, MPO and  
648 anti-inflammatory cytokines IL-10 were detected by ELISA kit. (Page 8, line:  
649 208-213)

650  
651 At the end of the experiment, the 1cm portion of the distal colon of 6 mice in each  
652 group was selected randomly for HE staining, and histopathological score and  
653 intestinal wall thickness were further measured ( $n=6$ ). (Page 8, line: 220-224)

654  
655 At the end of modeling (day 7 of the experiment), feces of 6 mice in each group were  
656 randomly selected for metagenomic sequencing, and at the end of treatment (day 15  
657 of the experiment), feces of 6 mice in each group were selected for metagenomic  
658 sequencing, to observe the effects of DSS and Lp082 on the intestinal microecology  
659 of mice. (Page 9, line: 258-262)

660  
661 To prove the above findings, we further used gas chromatography-mass spectrometry  
662 (GC-MS) to detect the content of SCFAs in cecal contents of 6 mice in each group.  
663 (Page 11, line: 308-309)

664  
665 At the end of the experiment, 6 mice from each group were randomly selected for  
666 colon transcriptome sequencing, and the volcanic map was drawn based on the  
667 preliminary gene distribution analysis results. (Page 13, line: 350-352)

668

669 C57BL/6J mice aged 7 weeks were randomly divided into 4 groups: control group  
670 ( $n=8$ ), dextran sulfate sodium (DSS) group ( $n=8$ ), lactobacillus plantarum HNU082  
671 (Lp082) group ( $n=8$ ), and salazosulfapyridine (SASP) group ( $n=8$ ). (Page 23, line:  
672 659-661)

673

674 After the mice were euthanized, the colon length of 8 mice in each group was  
675 measured, the weight of spleen, liver, and kidney of 8 mice in each group was  
676 measured. (Page 23, line: 677-679)

677

678 Before euthanasia, 6 mice were randomly selected from each group, and blood was  
679 collected from the orbital venous plexus by a capillary tube. (Page 24, line: 696-697)

680

681 Finally, the levels of interleukin-1beta (IL-1 $\beta$ ), interleukin-6 (IL-6), interleukin-10  
682 (IL-10), interleukin-17A (IL-17A), interferon-gamma (IFN- $\gamma$ ), Tumor necrosis  
683 factor-alpha (TNF- $\alpha$ ), and Myeloperoxidase (MPO) in the serum of 6 randomly  
684 selected mice from each group were measured using the corresponding ELISA kits  
685 (X-Y Biotechnology, Shanghai, China), as previously described. (Page 24, line:  
686 686-687)

687

688 After euthanasia, the distal 1cm colons of 6 mice in each group were randomly  
689 selected for HE staining section, histopathological score, and intestinal wall thickness  
690 measurement. (Page 24, line: 697-688)

691

692 On the other hand, 8 mice were selected from each group, and their colonic tissues  
693 were labeled with mucin 2 and ZO-1 antibodies, respectively [75], for further  
694 immunofluorescence staining (Servicebio, Wuhan, China). (Page 25, line: 710-712)

695

696 Six mice were randomly selected at two time points (day 7 and day 15 of the  
697 experiment) for metagenomic sequencing of feces. (Page 25, line: 728-7429)

698

699 At the end of the experiment, the cecal contents of 6 mice from each group were  
700 randomly selected for SCFAs determination, and the specific steps were as follows:  
701 (Page 26, line: 742-743)

702

703 At the end of the experiment, colon tissues of 6 mice from each group were randomly  
704 selected for RNA sequencing. (Page 26, line: 757-758)

705

706 e. Statistics:

707 a. Only one statistical test is indicated in the paper, Wilcoxin signed rank test, line 546  
708 in the methods. Adding the test run to each figure legend would be appropriate and  
709 helpful.

710 **Response:** We appreciate your valuable and helpful comment. We have added  
711 statistical test methods to each of the graphical legends. The revised content is as  
712 follows:

713 Wilcoxon signed-rank test is used here. The significant difference was  
714 considered at  $*p<0.05$ ,  $** p<0.01$  and  $***p<0.001$ . Each group had at least 6  
715 biological replicates.

716

717 b. Conditions statistical tests being used on are not obvious, in part due to the lack of  
718 descriptions on sample sizes and replicates.

719 **Response:** Thank you for your comments. We deeply agree with the opinions of  
720 reviewer and we have carefully checked the whole paper, and added descriptions of  
721 sample size and replicates in material and methods, legends and corresponding places  
722 in the article. The changes have been highlighted in the text in yellow. The details are  
723 as follows:

724

725 After the experiment, the spleen, liver, kidney and colon of 8 mice were selected from  
726 each group for observation and measurement. (Page 6, line: 170-172)

727

728 To further evaluate the effects of Lp082 on inflammatory cytokines in mice with  
729 colitis, serum of 6 mice in each group was randomly collected after the experiment,  
730 and the levels of pro-inflammatory cytokines TNF- $\alpha$ , IL-1 $\beta$ , IFN- $\alpha$ , IL-6, MPO and  
731 anti-inflammatory cytokines IL-10 were detected by ELISA kit. (Page 8, line:  
732 208-213)

733

734 At the end of the experiment, the 1cm portion of the distal colon of 6 mice in each  
735 group was selected randomly for HE staining, and histopathological score and  
736 intestinal wall thickness were further measured ( $n=6$ ). (Page 8, line: 220-224)

737

738 At the end of modeling (day 7 of the experiment), feces of 6 mice in each group were  
739 randomly selected for metagenomic sequencing, and at the end of treatment (day 15  
740 of the experiment), feces of 6 mice in each group were selected for metagenomic  
741 sequencing, to observe the effects of DSS and Lp082 on the intestinal microecology  
742 of mice. (Page 9, line: 258-262)

743

744 To prove the above findings, we further used gas chromatography-mass spectrometry  
745 (GC-MS) to detect the content of SCFAs in cecal contents of 6 mice in each group.  
746 (Page 11, line: 308-309)

747

748 At the end of the experiment, 6 mice from each group were randomly selected for  
749 colon transcriptome sequencing, and the volcanic map was drawn based on the  
750 preliminary gene distribution analysis results. (Page 13, line: 350-352)

751

752 C57BL/6J mice aged 7 weeks were randomly divided into 4 groups: control group  
753 ( $n=8$ ), dextran sulfate sodium (DSS) group ( $n=8$ ), lactobacillus plantarum HNU082  
754 (Lp082) group ( $n=8$ ), and salazosulfapyridine (SASP) group ( $n=8$ ). (Page 23, line:  
755 659-661)

756

757 After the mice were euthanized, the colon length of 8 mice in each group was

758 measured, the weight of spleen, liver, and kidney of 8 mice in each group was  
759 measured. (Page 23, line: 677-679)

760

761 Before euthanasia, 6 mice were randomly selected from each group, and blood was  
762 collected from the orbital venous plexus by a capillary tube. (Page 24, line: 696-697)

763

764 Finally, the levels of interleukin-1beta (IL-1 $\beta$ ), interleukin-6 (IL-6), interleukin-10  
765 (IL-10), interleukin-17A (IL-17A), interferon-gamma (IFN- $\gamma$ ), Tumor necrosis  
766 factor-alpha (TNF- $\alpha$ ), and Myeloperoxidase (MPO) in the serum of 6 randomly  
767 selected mice from each group were measured using the corresponding ELISA kits  
768 (X-Y Biotechnology, Shanghai, China), as previously described. (Page 24, line:  
769 686-687)

770

771 After euthanasia, the distal 1cm colons of 6 mice in each group were randomly  
772 selected for HE staining section, histopathological score, and intestinal wall thickness  
773 measurement. (Page 24, line: 697-688)

774

775 On the other hand, 8 mice were selected from each group, and their colonic tissues  
776 were labeled with mucin 2 and ZO-1 antibodies, respectively [75], for further  
777 immunofluorescence staining (Servicebio, Wuhan, China). (Page 25, line: 710-712)

778

779 Six mice were randomly selected at two time points (day 7 and day 15 of the  
780 experiment) for metagenomic sequencing of feces. (Page 25, line: 728-7429)

781

782 At the end of the experiment, the cecal contents of 6 mice from each group were  
783 randomly selected for SCFAs determination, and the specific steps were as follows:  
784 (Page 26, line: 742-743)

785

786 At the end of the experiment, colon tissues of 6 mice from each group were randomly  
787 selected for RNA sequencing. (Page 26, line: 757-758)



788

789 Minor points:

790 1. Missing information that should be addressed:

791 a. Rationale:

792 I. The introduction provides weak descriptions and evidence for use of a probiotic in  
793 general to treat UC and Lp082 specifically. The introduction would benefit from  
794 further elaboration on what is known about probiotic treatment of UC and indicate  
795 what is or isn't known about Lp082 usage in UC specifically rather than using general  
796 "probiotics" references. Along with this, lines 55-59 are confusing as written, but this  
797 may be addressed when more information is added about those two points.

798 **Response:** We appreciate your valuable comment. According to your helpful  
799 suggestions, we have rewritten this section to include more references detailing the  
800 etiology of UC, current status of *lactobacillus plantarum* in the treatment of UC and  
801 the reasons for using Lp082. The revised content is as follows: (Page 3, line: 62-111)

802 Inflammatory bowel disease (IBD) is a chronic non-specific inflammatory  
803 disease occurring in the gastrointestinal tract, mainly including ulcerative colitis (UC)  
804 and crohn's disease (CD) [1]. The clinical manifestations of UC patients are diarrhea,  
805 blood in the stool, weight loss, and diffuse inflammation of the colonic mucosa [2].  
806 UC has become a major health problem worldwide due to its chronicity, recurrence,  
807 and high morbidity [3], high risk of developing into Colorectal cancer (CRC) [4]. Due  
808 to the disadvantages of traditional surgery and drug therapy of UC, such as  
809 postoperative complications, side effects, and high cost [5], there is an urgent need to  
810 develop a new UC treatment method.

811 There is no consensus on the specific pathogenesis of UC, and many evidences  
812 suggest that the pathogenesis of UC is multifactorial, involving genetic susceptibility,  
813 epithelial barrier defects, immune response disorders and environmental factors [6].

814 Differences in gut microbiota (type and amount) between colitis patient and healthy  
815 people are thought to be one of the key factors in disease progression [7]. In UC  
816 patients, the immune response is activated, the intestinal permeability is increased, the  
817 intestinal mucosal barrier structure is destroyed, the homeostasis of gut microbiota is

818 disturbed, and the intestinal symbiotic bacteria are destroyed, thus activating a more  
819 serious immune response, leading to the recurrence of the disease [8].

820 Due to the shortcomings of traditional treatments, it is urgent to develop new  
821 treatments for UC, among which probiotics, as a substitute for antibiotics, have  
822 attracted much attention for regulating gut microbiota to effectively alleviate UC  
823 [9].As one of the main probiotics, *lactobacillus plantarum* has the characteristics of  
824 regulating the balance of gut microbiota, increasing the adhesion of beneficial bacteria  
825 to intestinal mucosa, inhibiting the adhesion of pathogenic bacteria and inhibiting the  
826 inflammatory reaction [10]. Both animal [11] and clinical trials [12] have reported  
827 that *lactobacillus plantarum* can reduce chronic mucosal inflammation in patients  
828 with UC and prevent the occurrence of experimental colitis induced by DSS. In  
829 addition, Bibiloni et al. evaluated the efficacy of *lactobacillus VSL#3* in 20 patients  
830 with IBD and VSL#3 in newly diagnosed children with IBD and found that the  
831 *lactobacillus strain* was effective in mild to moderate adult patients with IBD [13].  
832 Yin et al. [14] believe that *lactobacillus plantarum* can restore the damaged mucosal  
833 barrier function, regulate the imbalance of intestinal microbiota, inhibit pathogenic  
834 bacteria, enhance intestinal system immunity, and have a good effect on relieving IBD  
835 symptoms and maintaining remission. However, there are few studies on the specific  
836 mechanism of action of *lactobacillus plantarum* in UC treatment, and there is no  
837 unified argument [15].

838 The strain of *lactobacillus plantarum* HNU082 (Lp082) was originally isolated  
839 from a traditional fermented food-fish tea of the Li people in Hainan Province, China  
840 [16],which has a good safety profile and tolerance to acids and bile salts [17]. The  
841 results of Lp082 whole genome sequencing showed showed that this bacterium has  
842 great potential to develop as a probiotic in terms of physiology and function [5]In our  
843 previous study, Lp082 not only can enhance the ecological and genetic stability of the  
844 intestinal microbiota [18]. But also can inhibit the growth of *Fusobacterium*  
845 *nucleatum* and reduce the inflammatory response [19]. Previous studies have also  
846 shown that Lp082 exerts a preventive effect on hyperlipidemia through the  
847 modulation of metabolism [20]. In addition, ingestion of Lp082 and supplementation

848 with prebiotics improved the stability of the intestinal microbiota and reduced the  
849 occurrence of disorders associated with disease. These results invariably demonstrate  
850 the probiotic potential of Lp082. However, the treatment effect of Lp082 on UC has  
851 not been studied.

852 Therefore, we chose Lp082 to study the mechanism of probiotics in treating UC.

### 853 **Reference**

- 854 1. Ng SC, Shi HY, Hamidi N, Underwood FE, Tang W, Benchimol EI, et al. THE  
855 WORLDWIDE INCIDENCE AND PREVALENCE OF INFLAMMATORY BOWEL  
856 DISEASE IN THE 21ST CENTURY: A SYSTEMATIC REVIEW OF  
857 POPULATION-BASED STUDIES. *Gastroenterology*. 2017;152(5):S970-S1; doi:  
858 10.1016/s0016-5085(17)33292-4.
- 859 2. Bryant RV, Burger DC, Delo J, Walsh AJ, Thomas S, von Herbay A, et al. Beyond  
860 endoscopic mucosal healing in UC: histological remission better predicts  
861 corticosteroid use and hospitalisation over 6 years of follow-up. *Gut*.  
862 2016;65(3):408-14; doi: 10.1136/gutjnl-2015-309598.
- 863 3. Shamoony M, Martin NM, O'Brien CL. Recent advances in gut Microbiota  
864 mediated therapeutic targets in inflammatory bowel diseases: Emerging modalities for  
865 future pharmacological implications. *Pharmacological Research*. 2019;148; doi:  
866 10.1016/j.phrs.2019.104344.
- 867 4. Jess T, Rungoe C, Peyrin-Biroulet L. Risk of Colorectal Cancer in Patients With  
868 UC: A Meta-analysis of Population-Based Cohort Studies. *Clinical Gastroenterology  
869 and Hepatology*. 2012;10(6):639-45; doi: 10.1016/j.cgh.2012.01.010.
- 870 5. Marchesi JR, Adams DH, Fava F, Hermes GDA, Hirschfield GM, Hold G, et al.  
871 The gut microbiota and host health: a new clinical frontier. *Gut*. 2016;65(2):330-9; doi:  
872 10.1136/gutjnl-2015-309990.
- 873 6. Ungaro R, Mehandru S, Allen PB, Peyrin-Biroulet L, Colombel JF. UC. *Lancet*.  
874 2017;389(10080):1756-70; doi: 10.1016/s0140-6736(16)32126-2.
- 875 7. Moayyedi P, Surette MG, Kim PT, Libertucci J, Wolfe M, Onischi C, et al. Fecal  
876 Microbiota Transplantation Induces Remission in Patients With Active UC in a  
877 Randomized Controlled Trial. *Gastroenterology*. 2015;149(1):102-+; doi:

878 10.1053/j.gastro.2015.04.001.

879 8. Costello SP, Hughes PA, Waters O, Bryant RV, Vincent AD, Blatchford P, et al.  
880 Effect of Fecal Microbiota Transplantation on 8-Week Remission in Patients With UC  
881 A Randomized Clinical Trial. *Jama-Journal of the American Medical Association*.  
882 2019;321(2):156-64; doi: 10.1001/jama.2018.20046.

883 9. De Greef E, Vandenplas Y, Hauser B, Devreker T, Veereman-Wauters G.  
884 Probiotics and IBD. *Acta Gastroenterol Belg*. 2013;76(1):15-9.

885 10. Pan Y, Ning Y, Hu J, Wang Z, Chen X, Zhao X. The Preventive Effect of  
886 *Lactobacillus plantarum* ZS62 on DSS-Induced IBD by Regulating Oxidative Stress  
887 and the Immune Response. *Oxid Med Cell Longev*. 2021;2021:9416794; doi:  
888 10.1155/2021/9416794.

889 11. Hasannejad-Bibalan M, Mojtahedi A, Eshaghi M, Rohani M, Pourshafie MR,  
890 Talebi M. The effect of selected *Lactobacillus* strains on dextran sulfate  
891 sodium-induced mouse colitis model. *Acta Microbiologica Et Immunologica*  
892 *Hungarica*. 2020;67(2):138-42; doi: 10.1556/030.2020.00834.

893 12. Prantera C, Scribano ML, Falasco G, Andreoli A, Luzzi C. Ineffectiveness of  
894 probiotics in preventing recurrence after curative resection for Crohn's disease: a  
895 randomised controlled trial with *Lactobacillus* GG. *Gut*. 2002;51(3):405-9; doi:  
896 10.1136/gut.51.3.405.

897 13. Bibiloni R, Fedorak RN, Tannock GW, Madsen KL, Gionchetti P, Campieri M, et  
898 al. VSL#3 probiotic-mixture induces remission in patients with active UC. *The*  
899 *American journal of gastroenterology*. 2005;100(7):1539-46; doi:  
900 10.1111/j.1572-0241.2005.41794.x.

901 14. Yin MM, Yan XB, Weng WH, Yang YZ, Gao RY, Liu MF, et al. Micro Integral  
902 Membrane Protein (MIMP), a Newly Discovered Anti-Inflammatory Protein of  
903 *Lactobacillus plantarum*, Enhances the Gut Barrier and Modulates Microbiota and  
904 Inflammatory Cytokines. *Cellular Physiology and Biochemistry*. 2018;45(2):474-90;  
905 doi: 10.1159/000487027.

906 15. Kostic AD, Xavier RJ, Gevers D. The Microbiome in Inflammatory Bowel  
907 Disease: Current Status and the Future Ahead. *Gastroenterology*.

908 2014;146(6):1489-99; doi: 10.1053/j.gastro.2014.02.009.  
909 16. Zhang J, Wang X, Huo D, Li W, Hu Q, Xu C, et al. Metagenomic approach  
910 reveals microbial diversity and predictive microbial metabolic pathways in Yucha, a  
911 traditional Li fermented food. *Scientific Reports*. 2016;6; doi: 10.1038/srep32524.  
912 17. Huang S, Jiang S, Huo D, Allaband C, Estaki M, Cantu V, et al. Candidate  
913 probiotic *Lactobacillus plantarum* HNU082 rapidly and convergently evolves within  
914 human, mice, and zebrafish gut but differentially influences the resident microbiome.  
915 *Microbiome*. 2021;9(1); doi: 10.1186/s40168-021-01102-0.  
916 18. Ma C, Wasti S, Huang S, Zhang Z, Mishra R, Jiang S, et al. The gut microbiome  
917 stability is altered by probiotic ingestion and improved by the continuous  
918 supplementation of galactooligosaccharide. *Gut Microbes*. 2020;12(1); doi:  
919 10.1080/19490976.2020.1785252.  
920 19. Wang Y, Li J, Ma C, Jiang S, Li C, Zhang L, et al. *Lactobacillus plantarum*  
921 HNU082 inhibited the growth of *Fusobacterium nucleatum* and alleviated the  
922 inflammatory response introduced by *F. nucleatum* invasion. *Food & Function*.  
923 2021;12(21):10728-40; doi: 10.1039/d1fo01388b.  
924 20. Shao Y, Huo D, Peng Q, Pan Y, Jiang S, Liu B, et al. *Lactobacillus plantarum*  
925 HNU082-derived improvements in the intestinal microbiome prevent the development  
926 of hyperlipidaemia. *Food & Function*. 2017;8(12):4508-16; doi: 10.1039/c7fo00902j.  
927

928 II. The intro (starting at line 62) provides weak background on data for SCFAs  
929 alleviation of IBD. Citing work and adding text of SCFAs impact of IBD (preferably  
930 UC and action through immune cells) would be helpful.

931 **Response:** We appreciate your valuable comment. According to your helpful  
932 suggestions, we have rewritten this part and added more literature describing the  
933 effects of SCFAs on UC and its effects on immune cells. The revised content is as  
934 follows: (Page 4, line: 112-125)

935 *Lactobacillus* has been reported to have potential benefits for inflammatory  
936 Bowel Disease (IBD) and colorectal cancer (CRC) symptoms due to its ability to  
937 promote the formation of short-chain fatty acids (SCFAs) [1]. SCFAs are one of the

938 important metabolites of gut microbiota, and the main components in intestinal tract  
939 are butyrate, acetate and propionate. Many studies have shown that SCFAs has  
940 immunomodulatory effects [2], can reduce the expression of pro-inflammatory factors,  
941 reduce inflammatory response, and play an important role in the treatment of UC [3].  
942 Studies have shown that SCFAs can act on immune cells such as monocyte  
943 macrophages and lymphocytes, change their gene expression, affect differentiation,  
944 chemotaxis, proliferation and apoptosis, and thus participate in immune regulation [4].  
945 In inflammatory response, SCFAs can reduce the expression of C5aR, thus regulating  
946 the aggregation of macrophages and neutrophils [5], In addition, SCFAs can maintain  
947 the integrity and permeability of intestinal epithelial cells, promote the secretion of  
948 mucin in goblet cells, and protect the intestinal epithelial barrier so as to alleviate UC  
949 [6].

#### 950 **Reference**

- 951 1. Venegas DP, De la Fuente MK, Landskron G, Gonzalez MJ, Quera R, Dijkstra G,  
952 et al. Short Chain Fatty Acids (SCFAs)-Mediated Gut Epithelial and Immune  
953 Regulation and Its Relevance for Inflammatory Bowel Diseases. *Frontiers in*  
954 *Immunology*. 2019;10; doi: 10.3389/fimmu.2019.00277.
- 955 2. Burger-van Paassen N, Vincent A, Puiman PJ, van der Sluis M, Bouma J, Boehm  
956 G, et al. Regulation of the intestinal mucin MUC2 expression by short chain fatty  
957 acids: implications for epithelial protection. *Faseb Journal*. 2009;23.
- 958 3. Rodriguez-Nogales A, Algieri F, Garrido-Mesa J, Vezza T, Pilar Utrilla M,  
959 Chueca N, et al. Differential intestinal anti-inflammatory effects of *Lactobacillus*  
960 *fermentum* and *Lactobacillus salivarius* in DSS mouse colitis: impact on microRNAs  
961 expression and microbiota composition. *Molecular Nutrition & Food Research*.  
962 2017;61(11); doi: 10.1002/mnfr.201700144.
- 963 4. Wang SL, Zhang SY, Huang SM, Wu ZH, Pang JM, Wu YJ, et al. Resistant  
964 Maltodextrin Alleviates Dextran Sulfate Sodium-Induced Intestinal Inflammatory  
965 Injury by Increasing Butyric Acid to Inhibit Proinflammatory Cytokine Levels.  
966 *Biomed Research International*. 2020;2020; doi: 10.1155/2020/7694734.
- 967 5. Zhou YL, Xu HM, Xu J, Guo X, Zhao HL, Chen Y, et al. *F. prausnitzii* and its

968 supernatant increase SCFAs-producing bacteria to restore gut dysbiosis in  
969 TNBS-induced colitis. *Amb Express*. 2021;11(1); doi: 10.1186/s13568-021-01197-6.  
970 6. Hosseinkhani F, Heinken A, Thiele I, Lindenburg PW, Harms AC, Hankemeier T.  
971 The contribution of gut bacterial metabolites in the human immune signaling pathway  
972 of non-communicable diseases. *Gut Microbes*. 2021;13(1):1-22; doi:  
973 10.1080/19490976.2021.1882927.

974

975 **b. Impact:**

976 I. Referencing lines 94-115: No text is provided to indicate what the alterations in  
977 water intake, food intake, body weight, DAI, neurological responses, immune organ  
978 index, spleen and colon color and structure, hyperemia, and feces structure mean in  
979 the context of disease in DSS or in the Lp082 treated animals. This is not addressed  
980 elsewhere in the paper and would help the reader understand the impact of your  
981 results.

982 **Response:** Thank you for pointing this out. We have added the description according  
983 to your suggestion. The revised content is as follows. (Page 6, line: 146-203)

984 People with UC have a disorder of colon function, poor absorption, loss of  
985 appetite, weight loss, diarrhea, and bloody stools [1]. Therefore, the lower the body  
986 weight, the lower the amount of water and food intake, and the higher the DAI score  
987 (The scoring criteria is shown in **TABLE S1**), indicating the more severe enteritis.  
988 Therefore, water intake, food intake, body weight, and DAI were monitored daily to  
989 assess the severity of ulcerative enteritis modeling. "Molding ending" in **Fig. 1b** refers  
990 to the end date of modeling UC with DSS on days 1-7, and no DSS water was  
991 administered to mice beginning with day 8. The results showed that from 1 to 7 days,  
992 the water intake, food intake, and body weight of the DSS group, the Lp082 group,  
993 and the SASP group all showed a similar degree of gradual decrease, and these three  
994 groups were all significantly different from the Control group on day 7 ( $p < 0.05$ ),  
995 which may be because these three groups were all under the same DSS modeling  
996 conditions on days 0-7. Then on the 8th to 15th day, the water intake, food intake, and  
997 body weight of the DSS group were still decreasing, but the water intake, food intake,

998 and body weight of Lp082 and SASP group gradually increased. Specifically, the  
999 water and food intake of the Lp082 combined SASP group increased significantly  
1000 from day 9 ( $p < 0.05$ ), and body weight increased significantly from day 12 ( $p < 0.05$ ).  
1001 The DAI index of the DSS group, Lp082 group, and SASP group increased  
1002 significantly ( $p < 0.05$ ) from the third day compared with the Control group. After  
1003 stopping DSS gavage on the 8th day, the DAI index of the DSS self-healing group  
1004 still increased, while that of the Lp082 group and SASP group gradually decreased  
1005 from the 10th day, and the degree of decrease in the Lp082 group was greater than  
1006 that in the SASP group (**Fig. 1b**).

1007 In DSS-induced UC mice, the immune organ index gradually increased and the  
1008 colon length gradually shortened with increasing disease severity [2]. Therefore, we  
1009 measured the spleen, liver, kidney, and colon of the mice. The results showed that the  
1010 immune organ index of the DSS group was significantly increased ( $p < 0.05$ ), and the  
1011 immune organ index was significantly decreased after Lp082 intake ( $p < 0.05$ ) (**Fig.**  
1012 **1c**). The colon length of the mice in the DSS group was significantly decreased ( $p <$   
1013  $0.05$ ), and the colon length in Lp082 group was significantly increased ( $p < 0.05$ ) (**Fig.**  
1014 **1d**). In addition, we also observed that the intestinal contents of the colitis mice in the  
1015 DSS group were loose, unformed and there was blood in the intestinal lumen, while  
1016 the intestinal contents in the Lp082 and Control groups were clear particles, hard stool,  
1017 and no blood (**Fig. 1d**). The fecal morphology of the intestinal contents was similar to  
1018 the results observed in mouse feces on the buttocks of mice. The feces of the mice in  
1019 the DSS group were blood-red, and the feces were loose and unformed, while there  
1020 was no blood in the feces after Lp082 ingestion (**Fig. S1 a**).

1021 With the increase of disease degree, DSS-induced UC mice will have a worse  
1022 mental state, even abdominal pain, arch back, panic and other symptoms [3]. The  
1023 mental state of the mice was observed daily, and the results are shown in **Fig. S1 b**.  
1024 On the 7th day of modeling, mice in the control group were in a normal state, with  
1025 normal urine and feces, shiny hair, active spirit, sensitive reaction, and increased body  
1026 size. However, mice in the BCD group had yellow and smelly urine, difficult  
1027 defecation, bloody stool, dark and fried hair, slow reaction and easy panic, arched



1028 back, and reduced body size (**Fig. S1 b**). On the last day of treatment (Day 15),  
1029 compared with the arched back, retarded response, hematochezia, and lethargic in the  
1030 DSS group, the mental state of mice in the Lp082 and SASP groups gradually  
1031 returned to normal, with an active spirit, no arched back, no hematochezia and shiny  
1032 hair (**Fig. S1 b**). These results indicated that Lp082 intake could alleviate the  
1033 symptoms of depression, crouching, and untidy hair of mice in the DSS group in the  
1034 middle and late stage of the experiment (**Fig. S1 b**).

1035         Studies have shown that under the condition of inflammation, the spleen of mice  
1036 induced by DSS will increase hyperemia and even appear infection blackening.  
1037 Therefore, we looked at the spleens of mice and found that the spleens of mice in the  
1038 DSS group were significantly larger and darker than those of mice in the normal  
1039 group. The spleens of mice in the Lp082 and SASP groups were smaller and redder  
1040 rather than black than those in the DSS group (**Fig. S1 c**).

#### 1041 **Reference**

- 1042 1. Costello SP, Hughes PA, Waters O, Bryant RV, Vincent AD, Blatchford P, et al.  
1043 Effect of Fecal Microbiota Transplantation on 8-Week Remission in Patients With UC  
1044 A Randomized Clinical Trial. *Jama-Journal of the American Medical Association*.  
1045 2019;321(2):156-64; doi: 10.1001/jama.2018.20046.
- 1046 2. Rodriguez-Nogales A, Algieri F, Garrido-Mesa J, Vezza T, Pilar Utrilla M,  
1047 Chueca N, et al. Differential intestinal anti-inflammatory effects of *Lactobacillus*  
1048 *fermentum* and *Lactobacillus salivarius* in DSS mouse colitis: impact on microRNAs  
1049 expression and microbiota composition. *Molecular Nutrition & Food Research*.  
1050 2017;61(11); doi: 10.1002/mnfr.201700144.
- 1051 3. Sun MY, Liu YJ, Song YL, Gao Y, Zhao FJZ, Luo YH, et al. The ameliorative  
1052 effect of *lactobacillus plantarum*-12 on DSS-induced murine colitis. *Food & Function*.  
1053 2020;11(6):5205-22; doi: 10.1039/d0fo00007h.

1054

1055

1056 II. Lines 125-145: Text here would benefit from at least a little description on what  
1057 this data means at this point in the writing. E.g. what does MUC2 loss and ZOI

1058 abundance suggest about Lp082 effects?

1059 **Response:** Thank you for pointing this out; we have added the description according  
1060 to your suggestion, and the revised content is as follows. (Page 9, line: 239-254)

1061 MUC-2 is the mucin secreted by goblet cells, which can form the protective layer  
1062 of intestinal mucosa epithelium [1]. Tight junction protein ZO-1 is an important  
1063 physical barrier located in the gap between intestinal epithelial cells [2]. Studies have  
1064 shown that the content of ZO-1 and MUC-2 is reduced in UC, and its structure and  
1065 function are destroyed, resulting in increased intestinal permeability and harmful  
1066 substances entering the body, aggravating inflammation. Therefore, the levels of  
1067 MUC-2 and ZO-1 in colon were determined by immunofluorescence protein assay.  
1068 The results showed that the MUC-2 protein (green fluorescence) and ZO-1 protein  
1069 (red fluorescence) contents were higher in the control group, almost disappeared in  
1070 the DSS group, and significantly recovered in the Lp082 and SASP groups ( $p < 0.05$ ),  
1071 and even increased more than SASP in Lp082 group (**Fig. 2d-e**). These results were  
1072 consistent with the surface density results of the two proteins (**Fig. 2f-g**). This  
1073 suggests that Lp082 can reduce the decrease in the number of ZO-1 and MUC-2  
1074 caused by DSS, and maintain the normal structure and function of the intestinal  
1075 mucus protein layer and intestinal epithelial cells.

#### 1076 **Reference**

- 1077 1. Li XX, Wei B, Goodglick L, Wen T, Xia LJ, Braun J. Investigating Therapeutic  
1078 Approach of IBD Using Recombinant Glycoprotein Mucin2. *Faseb Journal*. 2009;23.
- 1079 2. Pan Y, Ning Y, Hu J, Wang Z, Chen X, Zhao X. The Preventive Effect of  
1080 *lactobacillus plantarum* ZS62 on DSS-Induced IBD by Regulating Oxidative Stress  
1081 and the Immune Response. *Oxid Med Cell Longev*. 2021;2021:9416794; doi:  
1082 10.1155/2021/9416794.

1083

1084 c. Methods:

1085 I. Scoring: Since understanding the scoring system used is important to understanding  
1086 the data, further describing the numbering and what that means would help the reader  
1087 understand the severity of the DSS model and the subsequent relief without looking

1088 up the methods reference (either in the figure legends (Figure 1B) or in the methods  
1089 (see lines 480-481 where the modifications to DAI are not indicated). DAI and  
1090 immune organ index should be described at some level in the results and figure  
1091 legends as well so the reader knows what the data is describing without the methods.)

1092 **Response:** Thank you for pointing this out. We deeply agree with the opinions of  
1093 reviewer. According to your helpful suggestions, we have added the description, and  
1094 the revised content is as follows.

1095 the higher the DAI score (The scoring criteria is shown in **TABLE S1**), indicating  
1096 the more severe enteritis. (Page 6, line: 148-149)

1097 The immune organ index (mg/g) of mouse spleen, liver, and kidney. The immune  
1098 organ index = immune organ weight (mg)/body weight (g). Increased coefficient of  
1099 immune organs indicates congestion and edema of organs and increased inflammation.  
1100 (Page 40, line: 1147-1150)

1101 In DSS-induced UC, the higher the histopathological scores, the thicker the  
1102 intestinal mucosal wall, indicating more severe disease and more severe inflammation.  
1103 (Page 8, line: 222-224)

1104

1105 The following has been added to the supplementary materials:

#### 1106 **FIGURE LEGENDS**

1107 **Fig. 1.** Effects of Lp082 on DSS-induced UC mice.

1108 (b) Water intake, food intake, body weight, and disease activity index (DAI scoring  
1109 system modified from previous studies (Table. S1)) in mice.

1110 (c) The immune organ index (mg/g) of mouse spleen, liver, and kidney. The immune  
1111 organ index = immune organ weight (mg)/body weight (g). Increased coefficient of  
1112 immune organs indicates congestion and edema of organs and increased inflammation.  
1113 (Page 40, line: 1143-1150)

1114

#### 1115 **SUPPLEMENTARY TABLE LEGENDS**

1116 **Table S1.**

1117 Disease activity index (DAI) scoring system of dextran sodium sulfate-induced

1118 colitis.

1119 The DAI scoring system consists of three parts: weight loss, stool consistency and  
1120 visible blood in feces. Each part has 5 grades from 0 to 4. A score of 0 means that the  
1121 three indicators are normal, and the closer the score is to 4, the more serious  
1122 inflammation it is. (Page 7, line: 65-70)

1123

1124 **Table S2.**

1125 Histopathology scoring system of dextran sodium sulfate-induced colitis. The  
1126 Histopathology scoring system scoring system was modified from previous studies [2].  
1127 The modified scoring system consists of six parts, namely, depth of Inflammation,  
1128 range of inflammation (%), crypt damage, goblet cell loss and the degree of  
1129 neutrophil Infiltration. Each component was rated on a scale of 0 to 4, a score of 0  
1130 means that the three indicators are normal, and the closer the score is to 4, the more  
1131 serious inflammation it is. (Page 9, line: 75-81)

1132

1133 II. How was "surface density" quantified? Line 144, figure 2F-G.

1134 **Response:** Thank you for pointing this out; we have added the surface density  
1135 description according to your suggestion, and the revised content is as follows. (Page  
1136 25, line: 716-724)

1137 The surface density of immunofluorescence ZO-1 and MUC-2 was measured and  
1138 calculated as follows: Eclipse CI-L fluorescence photography microscope was used to  
1139 select the target area of tissues for 200-fold imaging. After the imaging was completed,  
1140 image-Pro Plus 6.0 analysis software was used to convert green/red fluorescent  
1141 monochrome photos into black and white pictures, and then the same black was  
1142 selected as the unified standard to judge the positivity of all photos. The pixel area  
1143 was used as the standard unit. The positive cumulative optical DENSITY (IOD) and  
1144 the corresponding tissue pixel area in each section were measured, respectively, and  
1145 areal density =IOD/area was calculated.

1146

1147 III. Indicate the specific diet provided to the mice (line 459).

1148 **Response:** Thank you for your comment. We added the description of the specific  
1149 diet of mice according to your suggestion, and the revised content is as follows. (Page  
1150 22, line: 645-650)

1151 Mice in all groups were fed standard normal commercial mouse chow (It is  
1152 mainly composed of crude protein, crude fiber, crude fat and trace elements). Mice in  
1153 the Control group were free to drink normal water within 15 days, and the other three  
1154 groups were free to drink DSS water for the first 7 days, and were changed to normal  
1155 water from the 8th day.

1156

1157 IV. Elaborate on what you mean by "mouse colon samples" on line 537 for RNA-seq.

1158 **Response:** Thank you so much for pointing this out, and so sorry we didn't make it  
1159 clear here. The mouse colon sample here refers to the middle 1 cm of the mouse colon  
1160 for transcriptome sequencing. Requires RNA extraction mini-kit (Qiagen, Hilden,  
1161 Germany) to extract total RNA from mouse colon samples for transcriptome  
1162 sequencing.

1163

1164 d. Results structure:

1165 I. The experiments, including the rationale, the samples, and the conditions, should be  
1166 described at some level prior to discussing the results in the Results text so the readers  
1167 know what the results are referencing.

1168 **Response:** Thank you for your comment. We deeply agree with the opinions of  
1169 reviewer. At your wise suggestion, We have carefully reviewed the entire article and  
1170 added explanations of experimental principles, samples, and conditions at the  
1171 beginning of all Discussion and Results sections.

1172 People with UC have a disorder of colon function, poor absorption, loss of  
1173 appetite, weight loss, diarrhea, and bloody stools [8]. Therefore, the lower the body  
1174 weight, the lower the amount of water and food intake, and the higher the DAI score  
1175 (The scoring criteria is shown in **TABLE S1**), indicating the more severe enteritis.  
1176 Therefore, water intake, food intake, body weight, and DAI were monitored daily to  
1177 assess the severity of ulcerative enteritis modeling. (Page 6, line: 146-151)

1178 With the increase of disease degree, DSS-induced UC mice will have a worse  
1179 mental state, even abdominal pain, arch back, panic and other symptoms [30]. The  
1180 mental state of the mice was observed daily, and the results are shown in **Fig. S1 b**.  
1181 (Page 7, line: 184-186)

1182 In DSS-induced UC mice, the immune organ index gradually increased and the  
1183 colon length gradually shortened with increasing disease severity [23]. Therefore,  
1184 after the experiment, the spleen, liver, kidney and colon of 8 mice were selected from  
1185 each group for observation and measurement. (Page 6, line: 169-172)

1186 To further evaluate the effects of Lp082 on inflammatory cytokines in mice with  
1187 colitis, serum of 6 mice in each group was randomly collected after the experiment,  
1188 and the levels of pro-inflammatory cytokines TNF-, IL-1 $\beta$ , IFN- $\alpha$ , IL-6, MPO, and  
1189 anti-inflammatory cytokines IL-10 were detected by ELISA kit. (Page 8, line:  
1190 208-213)

1191 At the end of the experiment, the 1cm portion of the distal colon of 6 mice in  
1192 each group was randomly selected for HE staining, and histopathological score and  
1193 intestinal wall thickness were further measured ( $n=6$ ). In DSS-induced UC, the higher  
1194 the histopathological scores, the thicker the intestinal mucosal wall, indicating more  
1195 severe disease and more severe inflammation. (Page 8, line: 220-224)

1196 MUC-2 is the mucin secreted by goblet cells, which can form the protective layer  
1197 of intestinal mucosa epithelium [30]. Tight junction protein ZO-1 is an important  
1198 physical barrier located in the gap between intestinal epithelial cells [10]. Studies  
1199 have shown that the content of ZO-1 and MUC-2 is reduced in UC, and its structure  
1200 and function are destroyed, resulting in increased intestinal permeability and harmful  
1201 substances entering the body, aggravating inflammation. Therefore, the levels of  
1202 MUC-2 and ZO-1 in the colon were determined by immunofluorescence protein assay.  
1203 (Page 9, line: 239-246)

1204 To further observe the effects of Lp082 on the gut microbiota of mice, we  
1205 sequenced the metagenome of feces of mice. At the end of modeling (day 7 of the  
1206 experiment), feces of 6 mice in each group were randomly selected for metagenomic  
1207 sequencing. At the end of treatment (day 15 of the experiment), feces of 6 mice in

1208 each group were randomly selected for metagenomic sequencing, to observe the  
1209 effects of DSS and Lp082 on the intestinal microecology of mice. (Page 9, line:  
1210 257-262)

1211 To prove the above findings, we further used gas chromatography-mass  
1212 spectrometry (GC-MS) to detect the content of SCFAs in cecal contents of 6 mice in  
1213 each group. (Page 11, line: 308-318)

1214 At the end of the experiment, 6 mice from each group were randomly selected  
1215 for colon transcriptome sequencing, and the volcanic map was drawn based on the  
1216 preliminary gene distribution analysis results. (Page 13, line: 350-352)

1217

1218 II. Brief overall conclusions should be provided in the Results text to continue  
1219 engaging the reader and leading them along your thought process. This can be  
1220 partially addressed by moving text from the Discussion section to the Results. E.g.  
1221 lines 302-306 can be moved to the results section where diversity is discussed.

1222 **Response:** We agree with the comment. According to your excellent suggestion, we  
1223 moved the Discussion lines 302-306 to the Results section, where we discuss diversity,  
1224 with a slight modification. The revised content is as follows: (Page 10, line: 282-284)

1225 The above results show that Lp082 treatment remarkably increased the gut  
1226 microbiota diversity and reduced gut microbiota structural differences in gut  
1227 microbiota, as shown by the cluster analysis and PCoA analysis, also optimized  
1228 species composition.

1229

1230 e. Figures:

1231 I. Figure 1:

1232 Fig 1A - the arrows make it look like PBS only led to weight and colon assessment,  
1233 probiotics to immune indices, SASP to sequencing. Collapsing the arrows would  
1234 address this.

1235 **Response:** Thanks for your nice comments. In the revised manuscript, we have  
1236 corrected the figure. The folded arrow has been added to **Fig. 1a**. Here, PBS refers to  
1237 phosphate buffered solution, which can provide a relatively stable ionic environment

1238 and pH buffering capacity, and is a buffer salt solution commonly used in biology. **Fig.**  
1239 **1a** shows that on days 8-15, mice in Control group and DSS group were intragastric  
1240 with PBS solution, mice in the Lp082 group were intragastric with probiotics solution,  
1241 and mice in the SASP group were intragastric with SASP solution. The purpose of  
1242 such different gavage is to observe the effect of Lp082 on UC by comparing with DSS  
1243 self-healing and SASP positive drugs.

1244

1245 Fig 1B - what's being compared for the stats is not well described

1246 **Response:** We really appreciate your efforts and comments on our manuscript. We  
1247 have revised our manuscript according to your comments and suggestions. The  
1248 statistical data in **Fig. 1b** are re-described, and the revised content is as follows: (Page  
1249 6, line: 153-168)

1250 The results showed that from 1 to 7 days, the water intake, food intake, and body  
1251 weight of the DSS group, the Lp082 group and the SASP group all showed a similar  
1252 degree of gradual decrease, and these three groups were all significantly different  
1253 from the Control group on day 7 ( $p < 0.05$ ), which because these three groups were all  
1254 under the same DSS modeling conditions on days 0-7. Then on the 8th to 15th day,  
1255 the water intake, food intake, and body weight of the DSS group were still decreasing,  
1256 but the water intake, food intake, and body weight of Lp082 and SASP group  
1257 gradually increased. Specifically, the water and food intake of the Lp082 in SASP  
1258 group increased significantly from day 8 ( $p < 0.05$ ), and body weight increased  
1259 significantly from day 11 ( $p < 0.05$ ). The DAI index of the DSS group, Lp082 group,  
1260 and SASP group increased significantly ( $p < 0.05$ ) from the second day compared  
1261 with the Control group. After stopping DSS gavage on the seventh day, the DAI index  
1262 of the DSS self-healing group still increased, while that of the Lp082 group and SASP  
1263 group gradually decreased from the 9th day, and the degree of decrease in the Lp082  
1264 group was greater than that in the SASP group. (**Fig. 1b**)

1265

1266 Fig 1C - the bars for stats are shifted (also make sure the lines are the same point  
1267 thickness for stats in each figure)



1268 **Response:** Thanks for your helpful comments. We are very sorry for our negligence  
1269 and we have corrected **Fig. 1c** according to your helpful suggestion. We have checked  
1270 all the pictures carefully to make sure we don't have the same problem again.

1271

1272 Fig 1B - "molding ending" is not described in the text. Rephrase or define. Also  
1273 decrease the numbers in the X axis as they are too condensed. The title "duration of  
1274 probiotic intervention (day)" is an incorrect title as this figure shows duration of the  
1275 entire experiment, including pre-treatment with DSS before probiotics.

1276 **Response:** Thank you for your helpful comment. We deeply agree with your  
1277 suggestion and we have made correction according to your nice suggestions.  
1278 "Molding ending" in **Fig. 1b** refers to the end date of modeling UC with DSS on days  
1279 1-7, no DSS water was administered to mice beginning with day 8. We have added the  
1280 description of "molding ending" in both the figure legend and the results section,  
1281 reduced the number on the X axis, and changed the "duration of probiotic intervention  
1282 (day)" to the duration of the entire experiment "Days" based on your good idea.

1283

1284 Fig 1E - there's no Y-axis label and the datapoints are not described

1285 **Response:** Thank you for your helpful comment. We are very sorry for our  
1286 negligence and we have modified the figure according to your suggestion. The  
1287 changes have been highlighted in yellow in the text.

1288

1289 II. Figure 2:

1290 Fig 2A - you might try to line up your red boxes better so they better represent the  
1291 blow ups (and make straighter red lines).

1292 **Response:** Thank you for your helpful comment. We deeply agree with your  
1293 suggestion and we have made correction according to your nice suggestions.

1294

1295 Fig 2B - add microscopy information for the antibody stains in the legend and/or the  
1296 methods section. Although the staining method cites another paper, it's best to include  
1297 antibody information in the methods section. MUC2, ZO-1, and the blue marker are

1298 not labeled in the figure and in the figure legend.

1299 **Response:** Thank you for your helpful comment. We agree with your suggestion, and  
1300 we have added the description in the legend and method section according to your  
1301 suggestion. The details of the modification are as follows:

1302 On the other hand, 8 mice were selected from each group, and their colonic tissues  
1303 were labeled with mucin 2 and ZO-1 antibodies, respectively [75], for further  
1304 immunofluorescence staining (Servicebio, Wuhan, China). Fluorescein is linked to the  
1305 antibodies ZO-1 and MUC-2 to form fluorescent antibodies. By specifically binding  
1306 to the antigen to form a multi-component complex, ZO-1 and MUC-2 can be  
1307 characterized and localized in the intestinal tissue by means of a fluorescence  
1308 microscope research. (Page 25, line: 710-716)

#### 1309 **FIGURE LEGENDS**

1310 Fig. 2. Effects of Lp082 on histological parameters and immunofluorescent proteins.  
1311 (d) Immunofluorescence staining of MUC-2 (green fluorescence). Scale bar = 100  $\mu$ m.  
1312 Blue marker is the color of the negative of the photograph (colon tissue without  
1313 antigenic markers)  
1314 (e) Immunofluorescence staining of ZO-1 (red fluorescence). Scale bar = 100  $\mu$ m.  
1315 Blue marker is the color of the negative of the photograph (colon tissue without  
1316 antigenic markers) (Page 40, line: 1164-1169)

1317

1318 Fig 2C - the y axis is missing a metric

1319 **Response:** Thank you very much for your reminder. We are very sorry for our  
1320 negligence of metric. **Fig. 2c**-Y axis refers to the thickness of the intestinal mucosal  
1321 wall, and its measurement method has been added to the material method section. We  
1322 have carefully checked the full text and have highlighted the changes in yellow. The  
1323 details are as follows. (Page 24, line: 706-709)

1324 The thickness of the intestinal mucosal wall was measured in the following ways:  
1325 Image-Pro Plus 6.0 analysis software was used to measure the thickness of the  
1326 mucosal layer at 5 positions of each layer (first from the right) in a unified mm  
1327 standard unit, and the average value was calculated.

1328

1329 Fig 2f-g - the y axes are missing metrics (as noted above, the method to define these  
1330 numbers is not stated).

1331 **Response:** Thank you for your helpful comment. We are very sorry for our  
1332 negligence of metric. **Fig. 2c**-Y axis refers to the areal density of MUC-2 and ZO-1,  
1333 and its measurement method has been added to the material method section. We have  
1334 carefully checked the full text and have highlighted the changes in yellow. The details  
1335 are as follows. (Page 25, line: 716-724)

1336 The surface density of immunofluorescence ZO-1 and MUC-2 was measured and  
1337 calculated as follows: Eclipse CI-L fluorescence photography microscope was used to  
1338 select the target area of tissues for 200-fold imaging. After the imaging was completed,  
1339 image-Pro Plus 6.0 analysis software was used to convert green/red fluorescent  
1340 monochrome photos into black and white pictures, and then the same black was  
1341 selected as the unified standard to judge the positivity of all photos. The pixel area  
1342 was used as the standard unit. The positive cumulative optical DENSITY (IOD) and  
1343 the corresponding tissue pixel area in each section were measured, respectively, and  
1344 areal density =IOD/area was calculated.

1345

1346 III. Figure 3:

1347 Fig 3A-C groupings not labeled as indicated above

1348 **Response:** Thank you for your comment. We are grateful for your reminder. To be  
1349 more clear and in accordance with the reviewer's concerns,, we have added **Fig. S3**  
1350 to explain the groupings in **Fig 3a-3c**. We also supplemented the description of this part  
1351 in the supplementary material. The revised content is highlighted in yellow. The  
1352 specific content is as follows. (Page 3, line: 22-33)

1353 **SUPPLEMENTARY FIGURE LEGENDS**

1354 **Fig.S3**

1355 (a) Timing and grouping of mouse metagenomic sequencing

1356 M means the modeling period, T means the treatment period. Respectively, A, B, C

1357 and D group mean 7 days normal water (ultrapure water), DSS, Lp082 and SASP  
1358 treatment after 7 days DSS gavage.

1359 M-A means A group represents the control group on the 7th day of DSS modeling,  
1360 M-B represents the DSS group on the 7th day of DSS modeling, M-C represents the  
1361 Lp082 group on the 7th day of DSS modeling, M-D represents the SASP on the 7th  
1362 day of DSS treatment Group.

1363 T-A means treating-A group represents the control group at the end of the treatment,  
1364 T-B represents the DSS group at the end of the treatment, T-C represents the Lp082  
1365 group at the end of the treatment, and T-D represents the SASP group at the end of the  
1366 treatment.

1367

1368 Fig 3D - The meaning of the red highlighting is not indicated in the figure legend. No  
1369 information is provided about the tree, including what it represents and what the  
1370 colors indicate. The heat map values are not described - what is being compared and  
1371 what does a value of zero mean?

1372 **Response:** Thank you for your helpful comment and your remind, we have  
1373 supplemented the description of the figure in the legend and all revisions have been  
1374 highlighted, and the revised content is as follows. (Page 41, line: 1181-1193)

#### 1375 FIGURE LEGENDS

1376 **Fig. 3.** Effects of Lp082 strains on the gut microbiota in mice.

1377 (d)The red highlight in the **Fig. 3d** refers to the significantly increased bacteria that  
1378 can produce SCFAs in the Lp082 group. The tree in the **Fig. 3d** represents the  
1379 phylogenetic tree, which is obtained by clustering the abundance of each color block  
1380 based on the unifracs distance after taking  $\log_2(x*100)$  for the relative abundance at  
1381 the species level. The clustering does not reflect any evolutionary relationship. It  
1382 shows the abundance of bacterial species in the sample. 0 has no special meaning in it  
1383 (it is only used to facilitate the differentiation of overall abundance). The darker the  
1384 yellow in the color block in the Fig. 3d (the value closer to 2), the higher the relative  
1385 abundance. Darker blue (values closer to -2) indicate lower relative abundance.

1386

1387 IV. Figure 4:

1388 Fig. 4A - It is not entirely clear where this data comes from. My assumption was the  
1389 metagenome, but the Acetic acid sub section has me unsure. Describe this figure more,  
1390 taking care to describe what the acetic acid subsection is evaluating.

1391 **Response:** Thank you for your helpful comment. We are sorry to have failed to make  
1392 it clear and are very sorry about the inconvenience caused. According to your helpful  
1393 suggestions, we re-describe **Fig. 4** and the rewritten content is as follows: (Page 10,  
1394 line: 286-346)

#### 1395 **The regulatory role of SCFAs**

1396 Next, we conducted a correlation analysis between Lp082 (*lactobacillus*  
1397 *plantarum*) and SCFAs, and found that Lp082 (*lactobacillus plantarum*) was strongly  
1398 positively correlated with SCFAs (acetic acid, propionic acid, butyric acid) (**Fig. 4c**),  
1399 the correlation results suggested that Lp082 can increase the content of SCFAs. The  
1400 above results inspired us to further explore the relationship between Lp082 and  
1401 SCFAs, and we further analyzed the bacterial species and metabolic pathways  
1402 associated with SCFAs. Further metagenomic data provided support for our above  
1403 speculation. Combined with metagenomic data, the species composition of mice gut  
1404 microbiota was further analyzed. The results showed that the relative abundance of  
1405 some special bacteria increased in the Lp082 group, such as, *lactobacillus plantarum*,  
1406 *Bifidobacterium pseudolongum*, *Akkermansia muciniphila*, *Bacteroides ovatus*,  
1407 *Parabacteroides distasonis*, *Lactobacillus reuteri*, *Anaerotruncus sp G3 2012* (these  
1408 bacteria are highlighted in red in **Fig. 3d** ), all of which can metabolize produces the  
1409 SCFAs [1].

1410 Subsequently, we further analyzed the metabolic pathways of gut microbiota in  
1411 mice. Results of differential metabolic pathways showed that the abundance of gut  
1412 microbiota metabolic pathways related SCFAs production decreased in DSS group but  
1413 increased in Lp082 group (**Fig. 4a**). We infer that Lp082 can promote the content of  
1414 SCFAs (acetate, propionate and butyrate) by adjust three metabolic pathways,  
1415 including Pyruvate fermentation to Propanoate I, Pyruvate fermentation to acetate and

1416 lactate II, Acetyl CoA fermentation to Butanoate (**Fig. 4a**).

1417 To prove the above findings, we further used gas chromatography-mass  
1418 spectrometry (GC-MS) to detect the content of SCFAs. Compared with control group,  
1419 the contents of butyric acid, valeric acid, acetic acid, propionic acid and isobutyric  
1420 acid were significantly decreased after ingestion of DSS ( $P < 0.01$ ). Compared with  
1421 DSS group, the contents of butyric acid, acetic acid, propionic acid and isobutyric  
1422 acid were extremely significant increased after ingestion of Lp082 ( $P < 0.01$ ). This  
1423 confirmed our previous hypothesis based on the correlation that Lp082 intake would  
1424 increase SCFAs levels (**Fig. 4b**). Based on the above results, we speculate that Lp082  
1425 increase the content of SCFAs by affecting the abundance of SCFAs-producing  
1426 microbes, as well as the metabolic pathways of SCFAs-producing microbes.

1427 To further understand the role of SCFAs, we performed a Pearson correlation  
1428 analysis. The results showed that *helicobacter hepatica*, which was significantly  
1429 increased in the DSS group, was strongly negatively correlated with acetic acid,  
1430 propionic acid, and butyric acid (**Fig. 4c**). *lactobacillus plantarum*, *Bifidobacterium*  
1431 *pseudolongum*, *Akkermansia muciniphila*, *Parabacteroides distasonis*, *Lactobacillus*  
1432 *reuteri*, which were significantly increased in Lp082 group showed strong positive  
1433 correlation with acetic acid, propionic acid, and butyric acid. *Anaerotruncus sp G3*  
1434 *2012* and *Bacteroides ovatus* showed a strong positive correlation with butyric acid  
1435 and acetic acid, and a weak positive correlation with propionic acid (**Fig. 4c**). These  
1436 SCFAs including acetic acid, propionic acid, and butyric acid were all strong  
1437 negatively correlation with the pro-inflammatory factors TNF- $\alpha$ , IL-1 $\beta$ , IFN- $\gamma$ , IL-6,  
1438 MPO but strongly positively correlated with the inflammatory suppressor IL-10 (**Fig.**  
1439 **4d**). As important products of gut microbiota metabolism, SCFAs have certain  
1440 anti-inflammatory effects and play an important role in maintaining normal intestinal  
1441 morphology and function. Combined with the results of **Fig. 3d**, **Fig. 4a-4d**, as well  
1442 as the improvement of physiological indicators (**Fig. 1b-1d**), pathological indicators  
1443 (**Fig. 2a-2g**) and inflammatory factors (**Fig. 1e**) after ingestion of Lp082, we  
1444 speculated that Lp082 may alleviate DSS-induced UC by regulating SCFAs through  
1445 the following mechanisms (**Fig. S4**). That is, after the ingestion of Lp082, the

1446 abundance of the intestinal microbes of SCFAs-producing increased, which promoted  
1447 the content of SCFAs. The SCFAs has the function of promoting the secretion of  
1448 inflammatory cytokine and suppressing the secretion of inflammatory factors. The  
1449 changes in inflammatory cytokines affect the physiological indicators of mice, which  
1450 increases the weight, colon length, drinking water and eating volume of mice, and  
1451 reduces the DAI score and immune organs index. The changes in inflammatory  
1452 cytokines also affected the pathological indexes of mice, resulting in a decrease in  
1453 histopathological score and an increase in immunofluorescence protein content of  
1454 ZO-1 and MUC-2.

#### 1455 **Reference**

1456 1. Y. W. Cheng, J. M. Liu and Z. X. Ling, Short-chain fatty acids-producing  
1457 probiotics: A novel source of psychobiotics, Critical Reviews in Food Science and  
1458 Nutrition, DOI: 10.1080/10408398.2021.1920884.

1459

1460 Fig. 4C-D - A description of the tree components is missing. Describe the correlation  
1461 analysis more in the text and figure legend.

1462 **Response:** Thank you for your helpful comment and your reminder. We are sorry to  
1463 have failed to describe it clearly and are very sorry about the inconvenience caused.  
1464 According to your helpful suggestions, we have supplemented the description of the  
1465 figure in the legend, and all revisions have been highlighted, and the revised content is  
1466 as follows:

1467 The following sections have been added to the legend: (Page 41, line: 1198-1241)

#### 1468 **FIGURE LEGENDS**

##### 1469 **Fig. 4.**

1470 (c)Relationship between SCFAs and gut microbiota. The tree in the **Fig. 4c** represents  
1471 the phylogenetic tree, which is obtained by clustering the data. This clustering does  
1472 not reflect any evolutionary relationships but rather shows the abundance of the  
1473 samples. **Fig. 4c** is a correlation heat map drawn by Pearson correlation analysis  
1474 based on bacterial abundance and SCFAs abundance. The correlation range is from -1  
1475 to +1. The closer to -1 or +1, the stronger the correlation between bacterial species

1476 and SCFAs. 0 means no correlation, a negative value means negative correlation, and  
1477 a positive value means positive correlation.

1478 (d) Relationship between SCFAs and inflammatory cytokines. The tree in the **Fig. 4d**  
1479 represents the phylogenetic tree, which is obtained by clustering the data. This  
1480 clustering does not reflect any evolutionary relationships but rather shows the  
1481 abundance of the samples. **Fig. 4d** is a correlation heat map drawn by Pearson  
1482 correlation analysis based on the content of inflammatory cytokines and the  
1483 abundance of SCFAs. The horizontal axis in the **Fig. 4d** is the clustering based on the  
1484 abundance of SCFAs, and the vertical axis is based on the abundance of inflammatory  
1485 cytokines. 0 means no correlation, a negative value means negative correlation, and a  
1486 positive value means positive correlation.

1487 The following sections have been added to the manuscript: (Page 12, line: 319-330)

1488 To further understand the role of SCFAs, we performed a Pearson correlation  
1489 analysis. The results showed that helicobacter hepatica, which was significantly  
1490 increased in the DSS group, was strongly negatively correlated with acetic acid,  
1491 propionic acid, and butyric acid (**Fig. 4c**). lactobacillus plantarum, Bifidobacterium  
1492 pseudolongum, Akkermansia muciniphila, Parabacteroides distasonis, Lactobacillus  
1493 reuteri ,which were significantly increased in Lp082 group showed strong positive  
1494 correlation with acetic acid, propionic acid, and butyric acid. Anaerotruncus sp G3  
1495 2012 and Bacteroides ovatus showed a strong positive correlation with butyric acid  
1496 and acetic acid, and a weak positive correlation with propionic acid (**Fig. 4c**). These  
1497 SCFAs including acetic acid, propionic acid, and butyric acid were all strong  
1498 negatively correlation with the pro-inflammatory factors TNF- $\alpha$ , IL-1 $\beta$ , IFN- $\gamma$ , IL-6,  
1499 MPO but strongly positively correlated with the inflammatory suppressor IL-10 (**Fig.**  
1500 **4d**).

1501

1502 V. Figure 5: I think this entire figure would be best placed in the supplement as it's  
1503 really just a sub-point of the contents of figure 6 (but it won't fit in figure 6). You  
1504 might also remove "distribution" from the title and legend as this suggests tissue  
1505 spatial information but is not needed.



1506 **Response:** Thank you for your helpful comment. We agree with the suggestions of the  
1507 reviewer. To be more clear and in accordance with the reviewer's concerns, we  
1508 re-described **Fig. 4a** and **Fig. 4b** and have put the entire figure of **Fig. 5** in the  
1509 supplement according to your suggestion and named it **Fig. S5**. The revised content  
1510 has been highlighted in yellow.

1511

1512 VI. Figure 6: Overall, the less color you use, the clearer this figure will be.

1513 **Response:** Thank you for your comment. We will take this into account in future  
1514 drawings. We are grateful for the suggestion. As suggested by the reviewer, we have  
1515 made some adjustments to the graphics. We have been deeply aware of this problem,  
1516 and we will also pay attention to reducing the use of colors in future drawings. Thank  
1517 you again for your help.

1518

1519 Fig 6A-C: I recommend condensing as Fig 6A. Describe what gene ratio is in the  
1520 figure legend.

1521 **Response:** Thank you for your comment. We agree with your suggestion. According  
1522 to your helpful suggestions, we have renamed **Fig. 6a-6c** to **Fig. 6a** and have added a  
1523 description of the gene ratio in the legend. All revisions have been highlighted, and  
1524 the revised content is as follows: (Page 42, line: 1223-1224)

1525 Gene Ratio: Ratio of the number of genes related to this Term to the total number of  
1526 genes

1527

1528 Fig 6D-F: I recommend condensing as Fig 6B.

1529 **Response:** Thank you for your comment. We agree with your suggestion. According  
1530 to your helpful suggestions, we have renamed **Fig. 6d-6f** to **Fig. 6b**.

1531

1532 Fig 6G-J: I recommend condensing as Fig 6C. I and j legends are swapped. Describe  
1533 ifcSE in the legend.

1534 **Response:** Thank you for your comment. We agree with your suggestion. According  
1535 to your helpful suggestions, we have renamed **Fig. 6g-6j** to **Fig. 6c**. and have

1536 supplemented the description of the figure in the legend, all revisions have been  
1537 highlighted, and the revised content is as follows: (Page 43, line: 1233-1236)

1538 The IfcSE is the standard error, which is the value obtained from the standard  
1539 deviation (SD) of the sample divided by the square root of the previous sample size.  
1540 The smaller the standard error is, the smaller the difference between sample mean and  
1541 population mean is.

1542

1543 2. The authors confuse whether they are studying Lp082 prevention or treatment of  
1544 colitis by using verbiage referring to "prevention" and "treatment" interchangeably.  
1545 This makes it difficult to track what the authors are trying to accomplish (for example,  
1546 line 60 says "relieving", lines 76 and 87-88 say "prevention"). Because the authors  
1547 state that the colitis inducer (DSS) is administered at the time of treatment (Lp082) in  
1548 the beginning of the Results to evaluate prevention (line 87), but Figure 1A shows that  
1549 Lp082 is being added at day 8 (so not at the time of induction), I cannot assess which  
1550 is being studied: Lp082 1) treatment or 2) prevention of UC. My best assumption is  
1551 that the methods section is correct, and the methods says that DSS is used prior to  
1552 addition of Lp082, and thus the authors are studying Lp082 relief of colitis. Thus, the  
1553 language in the paper should be altered to indicate that Lp082 was administered after  
1554 DSS induced colitis and observed effects are Lp082 alleviation of symptoms, not  
1555 prevention of symptoms.

1556 **Response:** We appreciate your valuable and helpful comment. We apologize for the  
1557 language problems in the original manuscript. We sincerely apologize for the  
1558 confusion caused to you. We used DSS to establish a model of UC and then treated it  
1559 with Lp082. We have carefully checked the wording of the full text and corrected the  
1560 preventive effect to the therapeutic effect. Thank you very much for pointing this out.  
1561 It was very helpful. The changes have been highlighted in yellow in the article. And  
1562 the language presentation was improved with assistance from a native English speaker  
1563 with appropriate research background.

1564

1565

1566

1567 3. The abstract, discussion section, and figure 7B describe the effect of Lp082 on the  
1568 animal model through the groups: biological barrier, chemical barrier, mechanical  
1569 barrier, and immune barrier. I don't recommend subdividing "biological, chemical,  
1570 and mechanical barrier", as everything you are referring to is biological, chemical,  
1571 and mechanical in nature. Rather, use categories akin to "microbiota/microbiome  
1572 alterations, barrier function improvements, and inflammation reduction."

1573 **Response:** We appreciate your valuable and helpful comment. You have provided an  
1574 excellent suggestion. Thank you for pointing out this problem. We agree with your  
1575 views on this issue. Following your suggestion, the discussion of these four intestinal  
1576 barriers has been rewritten in the discussion section, but we think it is reasonable to  
1577 describe it in terms of these four barriers. The pathogenesis of UC is the result of the  
1578 combined effect of genetically susceptible hosts and the environment, and its common  
1579 pathological outcome is the damage of the structure and function of the intestinal  
1580 mucosal barrier. The intestinal mucosal barrier is damaged, resulting in an increase in  
1581 the permeability of the intestinal epithelial barrier, and further stimulation of intestinal  
1582 contents, bacteria, and toxins promotes the immune response to intestinal  
1583 inflammation. The normal intestinal mucosal barrier consists of mechanical barrier,  
1584 chemical barrier, immune barrier, and biological barrier. The chemical barrier refers to  
1585 the glue-like mucin layer covering the surface of intestinal epithelial cells, which is  
1586 mainly composed of MUC-2 secreted by goblet cells, digestive juices, and  
1587 bacteriostatic substances produced by normal parasitic bacteria in the intestinal lumen  
1588 [1]. The mechanical barrier is the most important part of the intestinal mucosal barrier.  
1589 Its structural basis is the intestinal mucosal epithelial cells and the tight junctions (TJ)  
1590 between the epithelial cells [2]. The immune barrier is associated with immune cells,  
1591 and inflammatory factors [3]. The biological barrier is a normal intestinal colony of  
1592 bacteria that is resistant to colonization by foreign strains [4]. The results of the study  
1593 found that Lp082 can improve the intestinal mucosal barrier by synergistically  
1594 optimizing the biological barrier, chemical barrier, mechanical barrier and immune  
1595 barrier, thereby alleviating UC. Specifically, We found that Lp082 rebuilt the

1596 biological barrier by regulating the intestinal microbiome and increasing the SCFAs.  
1597 Lp082 improved the chemical barrier by reducing ICAM-1, VCAM, and increasing  
1598 goblet cells and mucin2. Lp082 ameliorated the mechanical barrier by increasing the  
1599 ZO-1, ZO-2, and occludin and decreasing claudin-1 and claudin-2. Lp082 optimized  
1600 the immune barrier by reducing the content of IL-1 $\beta$ , IL-6, TNF- $\alpha$ , MPO, IFN- $\gamma$  and  
1601 increasing the IL-10, TGF- $\beta$ 1, and TGF- $\beta$ 2. In conclusion, we believe that it is  
1602 reasonable to use these four barriers to discuss the effect of Lp082 on DSS induced  
1603 UC. Maybe we didn't describe it very well, so we rewrote a discussion section that  
1604 explained the four barriers in more detail, with the following changes. (Page 17, line:  
1605 496-637)

1606 Lp082 improved chemical barrier

1607       The chemical barrier refers to the glue-like mucin layer covering the surface of  
1608 intestinal epithelial cells, which is mainly composed of MUC-2 secreted by goblet  
1609 cells, digestive juices and bacteriostatic substances produced by normal parasitic  
1610 bacteria in the intestinal lumen [1]. The chemical barrier plays an important role in  
1611 isolating the internal and external environment of the intestinal tract, lubricating the  
1612 intestinal mucosa, and inhibiting the entry of harmful substances in the intestinal  
1613 lumen [5]. The intestinal mucosal wall thickness was significantly increased in the  
1614 DSS group, whereas it was significantly decreased after Lp082 ingestion (**Fig. 2c**). In  
1615 DSS-induced UC, the thicker the intestinal mucosal wall, indicating more severe  
1616 inflammation. In addition, the H&E staining result showed that the number of goblet  
1617 cells decreased in the DSS group (red arrow), whereas the number of goblet cells  
1618 increased (yellow arrow) after Lp082 ingestion (**Fig. 2a**). The immunofluorescent  
1619 protein content of MUC-2, which is mainly secreted by goblet cells, was significantly  
1620 decreased in the DSS group (**Fig. 2d**), and the areal density of MUC-2 (**Fig. 2f**) and  
1621 the mRNA expression of MUC-2 were also significantly decreased in the DSS group  
1622 (**Fig. 5c**), while the immunofluorescence protein content, areal density and mRNA  
1623 expression of MUC-2 all increased in the Lp082 group,  
1624 Sun et al. [6] observed the same phenomenon that *lactobacillus plantarum 12* can  
1625 repair the intestinal mucosal chemical barrier by increasing the content of MUC-2.

1626 Burger-van Paassen et al. [7] found that intake of SCFAS could increase the  
1627 expression abundance of MUC-2 mRNA in cells. The mRNA expressions of ICAM-1  
1628 and VCAM-1 were significantly decreased after Lp082 intake. Taniguchi et al. [8]  
1629 found that anti-ICAM-1 treatment significantly attenuated colonic mucosal damage,  
1630 while Philpott et al. [9] found that adhesion molecules ICAM-1 & VCAM-1 induced  
1631 intestinal mucosal lesions. Lp082 has been shown to be effective in relieving  
1632 intestinal mucosal lesions (i.e., reduced ulceration and inflammatory cell infiltration  
1633 caused by DSS). So, we speculate that Lp082 reduces mucosal lesions by reducing  
1634 ICAM-1 and VCAM. The above results showed that probiotic Lp082 increased the  
1635 MUC-2 content in the mucus layer by restoring the number of goblet cells, relieved  
1636 the intestinal mucosal damage caused by ICAM-1 and VCAM-1, so as to repaired the  
1637 chemical barrier.

1638 Lp082 improved mechanical barrier

1639 The mechanical barrier is the most important part of the intestinal mucosal  
1640 barrier. Its structural basis is the intestinal mucosal epithelial cells and the tight  
1641 junctions (TJ) between the epithelial cells [2]. The mechanical barrier can effectively  
1642 prevent harmful substances such as bacteria and endotoxins from entering the blood  
1643 through the intestinal mucosa.iers The aberrant structure of tight junction (TJ)  
1644 proteins between intestinal epithelial cells, such as the reduction of ZO-1, ZO-2, and  
1645 occludin, is one of the critical factors leading to the disruption of the gut mechanical  
1646 barrier in UC patients [10]. Several studies have identified TJ protein as a new target  
1647 for the current treatment of UC [11]. Because Lp082 excellently improved  
1648 histopathology, we speculated that Lp082 also has a regulatory effect on TJ molecules.  
1649 To this end, we analyzed major TJ proteins, including ZO-1, ZO-2, occludin. As  
1650 expected, the mRNA expression and immunofluorescence protein content of ZO-1  
1651 and the mRNA expression of ZO-2 and occludin were significantly decreased in  
1652 DSS-induced UC mice but improved in the Lp082 treatment group. These are  
1653 consistent with the findings of Cordeiro et al. [12] that ZO-1 and ZO-2 were  
1654 significantly decreased in UC but increased after probiotic Minas Frescal cheese  
1655 intake, indicating that the improvement of the mechanical barrier by regulating TJ

1656 may be one of the mechanisms by which probiotic Lp082 exerts anti-UC. In addition,  
1657 the mRNA expression of another particular tight junction protein, ICAM-1 and  
1658 VCAM-1, was increased in the DSS group. It is consistent with the findings of  
1659 elevated ICAM-1 and VCAM-1 in IBD patients in clinical studies [13]. Mitselou et al.  
1660 [14] found that the adhesion molecules ICAM-1 and VCAM-1 induced intestinal  
1661 mucosal injury. Taniguchi et al. [8] found that anti-ICAM-1 treatment attenuated  
1662 colonic mucosal injury. It has been reported that ICAM-1 and VCAM-1 can increase  
1663 the permeability of intestinal mucosa [15]. Interestingly, the mRNA expression of  
1664 ICAM-1 and VCAM-1 was found to decrease after Lp082 ingestion. Therefore, it can  
1665 be thought that the alleviation of UC by Lp082 may be due to down-regulation of  
1666 ICAM-1, VCAM-1 and increase protein quantity and mRNA expression of  
1667 ZO-1, ZO-2, so as to reduce intestinal mucosal permeability, thereby inhibiting the  
1668 entry of harmful bacteria and undigested food and toxins into the body and reducing  
1669 inflammation. These results suggest that Lp082 repairs the intestinal mechanical  
1670 barrier by regulating TJ.

1671 Lp082 improved the immune barrier

1672 Although the exact etiology of UC is complex and uncertain, studies suggest that  
1673 the NF- $\kappa$ B pathway plays a vital role in the pathogenesis of UC [3]. Our study has  
1674 proved that Lp082 inhibits the NF- $\kappa$ B pathway by down-regulating the mRNA  
1675 expression of NF- $\kappa$ B2, NF- $\kappa$ B1, COX-2, Rel $\alpha$ , Toll4, iNOS, and that NF- $\kappa$ B can also  
1676 regulate inflammation by regulating cytokines [16]. Therefore, it can be suggested  
1677 that Lp082 also has a specific regulatory effect on cytokines. To confirm this, we  
1678 analyzed the cytokines associated with NF- $\kappa$ B. As expected, we observed that the  
1679 mRNA expression level content of pro-inflammatory cytokines (TNF- $\alpha$ , IL-1 $\beta$ , and  
1680 IL-6) were significantly increased in the DSS group but significantly decreased in the  
1681 Lp082 group, It is interesting to note that the protein levels of TNF- $\alpha$ , IL-1 $\beta$ , and IL-6  
1682 detected by elisa kit were also increased in the DSS group and decreased after Lp082  
1683 intake. Among them, TNF- $\alpha$  can promote the proliferation and differentiation of T  
1684 cells and increase intestinal inflammation [17]. The upregulation of IL-1 $\beta$  is involved  
1685 in the recruitment and retention of leukocytes in inflamed tissues and can activate

1686 innate immune lymphocytes [18]. IL-6 activates NF- $\kappa$ B to regulate the dextran sulfate  
1687 sodium-induced colitis in mice [19]. The above results indicate that Lp082 alleviates  
1688 UC by inhibiting the levels of pro-inflammatory factors (TNF- $\alpha$ , IL-1 $\beta$ , and IL-6).  
1689 Interestingly, we also found that the mRNA expressions of anti-inflammatory  
1690 cytokines IL10, TGF-1, and TGF-2 were significantly decreased in the DSS group but  
1691 increased in the Lp082 group. Il-10 protein levels measured by elisa kit also decreased  
1692 in the DSS group and increased in the Lp082 group. Surprisingly, IL10, TGF-1, and  
1693 TGF-2 were shown to activate Treg and anti-inflammatory macrophages to alleviate  
1694 UC [20]. And Sato et al. [21] also found that the loss of IL-10 spontaneously gave rise  
1695 to IBD, and Hume et al. [22] found that TGF- $\beta$ 1 and TGF- $\beta$ 2 could dramatically  
1696 relieve intestinal inflammation in DSS-induced colitis mice. These results suggest that  
1697 Lp082 alleviates UC by increasing the levels of anti-inflammatory factors IL10,  
1698 TGF-1, and TGF-2. We further analyzed the specific regulatory effects of Lp082 on  
1699 intestinal mucosal immunity. In addition to inflammatory factors, we also noticed that  
1700 a heme protein, MPO, was significantly reduced in the Lp082 group. Trevisin et al.  
1701 [23] found that MPO caused UC by producing cytokines and hypochlorite and that  
1702 MPO in the colon of UC patients is mainly produced by neutrophil infiltration [24].  
1703 Interestingly, this is consistent with the fact that the DSS group had a severe  
1704 neutrophil infiltration in this study. However, neutrophil infiltration and MPO content  
1705 were significantly decreased in Lp082 group. This shows that Lp082 alleviates UC by  
1706 reducing neutrophil infiltration and its secreted MPO content. In a nutshell, our results  
1707 suggest that Lp082 may play an anti-UC effect by inhibiting the NF- $\kappa$ B pathway,  
1708 down-regulating pro-inflammatory cytokines, and up-regulating anti-inflammatory  
1709 cytokines, reducing MPO content, thereby maintaining immune balance and  
1710 protecting the immune barrier.

1711 The mucosal immune system of the intestine mainly consists of Peyer's patch  
1712 and lamina propria under enterocyte [25]. The Peyer's patch can deliver captured  
1713 antigens to dendritic cells [26]. Then dendritic cells can not only trigger T  
1714 cell-mediated cellular immunity and B cell-mediated humoral immunity by presenting  
1715 antigens but also affect lamina propria immunity [27]. Combining previous studies,

1716 we found that DSS causes inflammation through the following six ways. First, gut  
1717 permeability increases, and harmful substances enter to activate innate immunity, such  
1718 as stimulating innate immune cells to produce TNF- $\alpha$ , IL-1 $\beta$ , and IL-6 [28]. Second,  
1719 regulatory T cells produce less IL-10 and have a less inhibitory effect on effector T  
1720 cells, resulting in the phenomenon of effector T and regulatory T cell dysregulation in  
1721 UC patients [29]. Third, effector T cells promote B cell-mediated humoral immunity  
1722 by promoting the secretion of IFN- $\gamma$  and L-17A [30]. Fourth, effector T cells carried  
1723 out immune cell recruitment and formed a vicious immune cycle with chemokines  
1724 and cytokines [31]. Fifth, Peyer's patch recognizes antigens and presents them to other  
1725 immune cells through dendritic cells [26]. Sixth, antigen-activated neutrophils can  
1726 both secrete MPO and recruit more immune cells from the bloodstream to the site of  
1727 inflammation, further exacerbating inflammation [32] (**Fig. 6b**). Based on the above 6  
1728 reasons, we suggest that in addition to relieving inflammation by inhibiting the NF- $\kappa$ B  
1729 pathway, Lp082 can also regulate inflammatory factors to maintain the balance  
1730 between regulatory T cells and effector T cells to regulate intestinal mucosal  
1731 immunity, thus maintaining the intestinal mucosal barrier.

1732 Lp082 improved the biological barrier

1733 Numerous studies [23] have shown that probiotics improve the clinical outcome  
1734 of IBD patients by influencing host gut microbiota [4]. Herein, we performed a  
1735 shotgun metagenomic analysis to investigate whether Lp082 can improve gut  
1736 dysbiosis in the UC mice model. As expected, we observed that the intake of DSS  
1737 significantly reduced the shannon value but increased PCoA distance, a finding that is  
1738 consistent with Wang et al. [33]. The Shannon index reflects gut microbiota richness  
1739 and uniformity and is positively correlated with gut microbiota diversity, while the  
1740 PCoA distance reflects the difference in the structure of the gut microbiota between  
1741 different groups; the higher the PCoA value, the greater the difference in the gut  
1742 microbiota structure [34]. In particular, Lp082 treatment remarkably increased the gut  
1743 microbiota diversity and reduced gut microbiota structural differences in gut  
1744 microbiota, as shown by the cluster analysis and PCoA analysis. On the other hand,  
1745 Lp082 also optimized species composition; that is, the abundance of



1746 pro-inflammatory microbiota decreased in the Lp082 group, such as *Helicobacter*  
1747 *hepaticus*, a potential pathogen of colitis. Likewise, we observed an increasing trend  
1748 in the abundance of potential probiotics in the Lp082 group, such as *Bifidobacterium*  
1749 *pseudolongum* and *Bacteroides ovatus*, which reduces colonic inflammation [35],  
1750 *Parabacteroides distasonis*, which is negatively associated with obesity and diabetes  
1751 [36], *Akkermansia muciniphila* and *Lactobacillus reuteri*, a widely studied probiotic,  
1752 *Anaerotruncus sp G3 2012* and *lactobacillus plantarum*, potential SCFAs-producing  
1753 bacteria [37]. The above results indicate that Lp082 is beneficial to optimizing the  
1754 diversity, structure, and composition of gut microbiota. After demonstrating that  
1755 Lp082 can increase the abundance of potential SCFAs-producing bacteria, further  
1756 analysis found that Lp082 can activate two SCFAs-producing microbial metabolic  
1757 pathways and the content of SCFAs. Subsequently, correlation analysis proved that  
1758 Lp082 may increase SCFAs by activating the SCFAs-producing metabolic pathway of  
1759 SCFAs-producing bacteria, so as to inhibit inflammation [38] and regulate host  
1760 physiological activity through SCFAs [39]. All of these suggest that Lp082 repaired  
1761 the microbial barrier by regulating the gut microbiome.

1762 In conclusions, the Lp082 has an exciting therapeutic effect on UC than SASP.  
1763 Also, shotgun metagenome and transcriptome analysis confirmed that Lp082 could  
1764 improve gut microbiota dysbiosis, protect intestinal mucosal barrier, regulate  
1765 inflammatory pathways, and affect neutrophil infiltration. These findings firmly  
1766 support and advocate the clinical translation of Lp082 in the treatment of UC. It can  
1767 be suggested that the application of gut microbiota and probiotics in the treatment of  
1768 UC should receive more attention. The findings of this study not only provide new  
1769 clues for revealing the complex mechanism of gut microbiota in relieving UC, but  
1770 also provide evidence for Lp082 as a potential gut microbiota regulator to treat UC.

## 1771 **References**

- 1772 1. Li XX, Wei B, Goodglick L, Wen T, Xia LJ, Braun J. Investigating Therapeutic  
1773 Approach of IBD Using Recombinant Glycoprotein Mucin2. *Faseb Journal*. 2009;23.
- 1774 2. Shi JL, Xie QG, Yue YX, Chen QX, Zhao LN, Evivie SE, et al. Gut microbiota  
1775 modulation and anti-inflammatory properties of mixed lactobacilli in dextran sodium

- 1776 sulfate-induced colitis in mice. *Food & Function*. 2021;12(11):5130-43; doi:  
1777 10.1039/d1fo00317h.
- 1778 3. Hu LH, Liu JY, Yin JB. Eriodictyol attenuates TNBS-induced UC through  
1779 repressing TLR4/NF-kB signaling pathway in rats. *Kaohsiung Journal of Medical*  
1780 *Sciences*. 2021;37(9):812-8; doi: 10.1002/kjm2.12400.
- 1781 4. Wang LA, Gao MX, Kang GB, Huang H. The Potential Role of Phytonutrients  
1782 Flavonoids Influencing Gut Microbiota in the Prophylaxis and Treatment of  
1783 Inflammatory Bowel Disease. *Frontiers in Nutrition*. 2021;8; doi:  
1784 10.3389/fnut.2021.798038.
- 1785 5. Fedorak RN. Understanding why probiotic therapies can be effective in treating  
1786 IBD. *Journal of clinical gastroenterology*. 2008;42 Suppl 3 Pt 1:S111-5; doi:  
1787 10.1097/MCG.0b013e31816d922c.
- 1788 6. Sun MY, Liu YJ, Song YL, Gao Y, Zhao FJZ, Luo YH, et al. The ameliorative  
1789 effect of *Lactobacillus plantarum*-12 on DSS-induced murine colitis. *Food & Function*.  
1790 2020;11(6):5205-22; doi: 10.1039/d0fo00007h.
- 1791 7. Burger-van Paassen N, Vincent A, Puiman PJ, van der Sluis M, Bouma J, Boehm  
1792 G, et al. Regulation of the intestinal mucin MUC2 expression by short chain fatty  
1793 acids: implications for epithelial protection. *Faseb Journal*. 2009;23.
- 1794 8. Taniguchi T, Tsukada H, Nakamura H, Kodama M, Fukuda K, Saito T, et al.  
1795 Effects of the anti-ICAM-1 monoclonal antibody on dextran sodium sulphate-induced  
1796 colitis in rats. *Journal of gastroenterology and hepatology*. 1998;13(9):945-9; doi:  
1797 10.1111/j.1440-1746.1998.tb00766.x.
- 1798 9. Philpott JR, Miner PB, Jr. Antisense inhibition of ICAM-1 expression as therapy  
1799 provides insight into basic inflammatory pathways through early experiences in IBD.  
1800 *Expert Opin Biol Ther*. 2008;8(10):1627-32; doi: 10.1517/14712598.8.10.1627.
- 1801 10. Edelblum KL, Turner JR. The tight junction in inflammatory disease:  
1802 communication breakdown. *Current Opinion in Pharmacology*. 2009;9(6):715-20; doi:  
1803 10.1016/j.coph.2009.06.022.
- 1804 11. Stio M, Retico L, Annese V, Bonanomi AG. Vitamin D regulates the  
1805 tight-junction protein expression in active UC. *Scandinavian Journal of*

1806 Gastroenterology. 2016;51(10):1193-9; doi: 10.1080/00365521.2016.1185463.

1807 12. Cordeiro BF, Alves JL, Belo GA, Oliveira ER, Braga MP, da Silva SH, et al.

1808 Therapeutic Effects of Probiotic Minas Frescal Cheese on the Attenuation of UC in a

1809 Murine Model. *Frontiers in Microbiology*. 2021;12; doi: 10.3389/fmicb.2021.623920.

1810 13. Nakamura S, Ohtani H, Watanabe Y, Fukushima K, Matsumoto T, Kitano A, et al.

1811 In situ expression of the cell adhesion molecules in inflammatory bowel disease.

1812 Evidence of immunologic activation of vascular endothelial cells. *Laboratory*

1813 *investigation; a journal of technical methods and pathology*. 1993;69(1):77-85.

1814 14. Mitselou A, Grammeniatis V, Varouktsi A, Papadatos SS, Klaroudas A, Katsanos

1815 K, et al. Immunohistochemical Study of Adhesion Molecules in Irritable Bowel

1816 Syndrome: A Comparison to Inflammatory Bowel Diseases. *Advanced biomedical*

1817 *research*. 2021;10:21; doi: 10.4103/abr.abr\_2\_20.

1818 15. Ruco LP, de Laat PA, Matteucci C, Bernasconi S, Sciacca FM, van der Kwast TH,

1819 et al. Expression of ICAM-1 and VCAM-1 in human malignant mesothelioma. *The*

1820 *Journal of pathology*. 1996;179(3):266-71.

1821 16. Bauer J, Namineni S, Reisinger F, Zoller J, Yuan DT, Heikenwalder M.

1822 Lymphotoxin, NF-kappa B, and Cancer: The Dark Side of Cytokines. *Digestive*

1823 *Diseases*. 2012;30(5):453-68; doi: 10.1159/000341690.

1824 17. Xiao B, Laroui H, Ayyadurai S, Viennois E, Charania MA, Zhang YC, et al.

1825 Mannosylated bioreducible nanoparticle-mediated macrophage-specific TNF-alpha

1826 RNA interference for IBD therapy. *Biomaterials*. 2013;34(30):7471-82; doi:

1827 10.1016/j.biomaterials.2013.06.008.

1828 18. 김연하, 김유림, 김성중, 황호근, Choi S-C, 김경숙, et al. Rebamipide Protects

1829 Colonic Damage Induced by Trinitrobenzene Sulfonic Acid (TNBS) via

1830 Down-Regulation of TNF- $\alpha$ , IL-1 $\beta$ , and ICAM-1. *Anatomy and Cell Biology*.

1831 2004;37(2):149-56.

1832 19. Zhou X, Liu H, Zhang J, Mu J, Zalan Z, Hegyi F, et al. Protective effect of

1833 *Lactobacillus fermentum* CQPC04 on dextran sulfate sodium-induced colitis in mice

1834 is associated with modulation of the nuclear factor-kappa B signaling pathway.

1835 *Journal of Dairy Science*. 2019;102(11):9570-85; doi: 10.3168/jds.2019-16840.

- 1836 20. Mohammadnia-Afrouzi M, Hosseini AZ, Khalili A, Abediankenari S, Amari A,  
1837 Aghili B, et al. Altered microRNA Expression and Immunosuppressive Cytokine  
1838 Production by Regulatory T Cells of UC Patients. *Immunological Investigations*.  
1839 2016;45(1):63-74; doi: 10.3109/08820139.2015.1103749.
- 1840 21. Sato Y, Takahashi S, Kinouchi Y, Shiraki M, Endo K, Matsumura Y, et al. IL-10  
1841 deficiency leads to somatic mutations in a model of IBD. *Carcinogenesis*.  
1842 2006;27(5):1068-73.
- 1843 22. Hume GE, Fowler EV, Lincoln D, Eri R, Templeton D, Florin TH, et al.  
1844 Angiotensinogen and transforming growth factor beta1: novel genes in the  
1845 pathogenesis of Crohn's disease. *Journal of medical genetics*. 2006;43(10):e51; doi:  
1846 10.1136/jmg.2005.040477.
- 1847 23. Trevisin M, Pollock W, Dimech W, Savige J. Evaluation of a multiplex flow  
1848 cytometric immunoassay to detect PR3- and MPO-ANCA in active and treated  
1849 vasculitis, and in inflammatory bowel disease (IBD). *Journal of immunological*  
1850 *methods*. 2008;336(2):104-12; doi: 10.1016/j.jim.2008.03.012.
- 1851 24. Chin AC, Parkos CA. Neutrophil transepithelial migration and epithelial barrier  
1852 function in IBD: potential targets for inhibiting neutrophil trafficking. *Annals of the*  
1853 *New York Academy of Sciences*. 2006;1072:276-87; doi: 10.1196/annals.1326.018.
- 1854 25. Jonker MA, Hermsen JL, Sano Y, Heneghan AF, Lan JG, Kudsk KA. Small  
1855 intestine mucosal immune system response to injury and the impact of parenteral  
1856 nutrition. *Surgery*. 2012;151(2):278-86; doi: 10.1016/j.surg.2010.10.013.
- 1857 26. Li HS, Gelbard A, Martinez GJ, Esashi E, Zhang HY, Nguyen-Jackson H, et al.  
1858 Cell-intrinsic role for IFN-alpha-STAT1 signals in regulating murine Peyer patch  
1859 plasmacytoid dendritic cells and conditioning an inflammatory response. *Blood*.  
1860 2011;118(14):3879-89; doi: 10.1182/blood-2011-04-349761.
- 1861 27. Santucci L, Agostini M, Bruscoli S, Mencarelli A, Ronchetti S, Ayroldi E, et al.  
1862 GTR modulates innate and adaptive mucosal immunity during the development of  
1863 experimental colitis in mice. *Gut*. 2007;56(1):52-60; doi: 10.1136/gut.2006.091181.
- 1864 28. Debnath T, Kim DH, Lim BO. Natural Products as a Source of  
1865 Anti-Inflammatory Agents Associated with Inflammatory Bowel Disease. *Molecules*.

1866 2013;18(6):7253-70; doi: 10.3390/molecules18067253.

1867 29. Goldberg R, Scotta C, Cooper D, Nissim-Eliraz E, Nir E, Tasker S, et al.  
1868 Correction of Defective T-Regulatory Cells From Patients With Crohn's Disease by  
1869 Ex Vivo Ligation of Retinoic Acid Receptor-alpha. *Gastroenterology*.  
1870 2019;156(6):1775-87; doi: 10.1053/j.gastro.2019.01.025.

1871 30. Cook L, Stahl M, Han X, Nazli A, MacDonald KN, Wong MQ, et al. Suppressive  
1872 and Gut-Reparative Functions of Human Type 1 T Regulatory Cells. *Gastroenterology*.  
1873 2019;157(6):1584-98; doi: 10.1053/j.gastro.2019.09.002.

1874 31. Singh UP, Singh NP, Murphy EA, Price RL, Fayad R, Nagarkatti M, et al.  
1875 Chemokine and cytokine levels in inflammatory bowel disease patients. *Cytokine*.  
1876 2016;77:44-9; doi: 10.1016/j.cyto.2015.10.008.

1877 32. Zhou GX, Yu L, Fang LL, Yang WJ, Yu TM, Miao YL, et al. CD177(+)  
1878 neutrophils as functionally activated neutrophils negatively regulate IBD. *Gut*.  
1879 2018;67(6):1052-63; doi: 10.1136/gutjnl-2016-313535.

1880 33. Wang R, Chen T, Wang Q, Yuan XM, Duan ZL, Feng ZY, et al. Total Flavone of  
1881 *Abelmoschus manihot* Ameliorates Stress-Induced Microbial Alterations Drive  
1882 Intestinal Barrier Injury in DSS Colitis. *Drug Design Development and Therapy*.  
1883 2021;15:2999-3016; doi: 10.2147/dddt.S313150.

1884 34. Suchodolski JS, Markel ME, Garcia-Mazcorro JF, Unterer S, Heilmann RM,  
1885 Dowd SE, et al. The Fecal Microbiome in Dogs with Acute Diarrhea and Idiopathic  
1886 Inflammatory Bowel Disease. *Plos One*. 2012;7(12); doi:  
1887 10.1371/journal.pone.0051907.

1888 35. Yang C, Du Y, Ren D, Yang X, Zhao Y. Gut microbiota-dependent catabolites of  
1889 tryptophan play a predominant role in the protective effects of turmeric  
1890 polysaccharides against DSS-induced UC. *Food Funct*. 2021;12(20):9793-807; doi:  
1891 10.1039/d1fo01468d.

1892 36. Cai W, Xu JX, Li G, Liu T, Guo XL, Wang HJ, et al. Ethanol extract of propolis  
1893 prevents high-fat diet-induced insulin resistance and obesity in association with  
1894 modulation of gut microbiota in mice. *Food Research International*. 2020;130; doi:  
1895 10.1016/j.foodres.2019.108939.

- 1896 37. Wang J, Ji HF, Wang SX, Liu H, Zhang W, Zhang DY, et al. Probiotic  
1897 *lactobacillus plantarum* Promotes Intestinal Barrier Function by Strengthening the  
1898 Epithelium and Modulating Gut Microbiota. *Frontiers in Microbiology*. 2018;9; doi:  
1899 10.3389/fmicb.2018.01953.
- 1900 38. Wang SL, Zhang SY, Huang SM, Wu ZH, Pang JM, Wu YJ, et al. Resistant  
1901 Maltodextrin Alleviates Dextran Sulfate Sodium-Induced Intestinal Inflammatory  
1902 Injury by Increasing Butyric Acid to Inhibit Proinflammatory Cytokine Levels.  
1903 *Biomed Research International*. 2020;2020; doi: 10.1155/2020/7694734.
- 1904 39. Holota Y, Dovbynchuk T, Kaji I, Vareniuk I, Dzyubenko N, Chervinska T, et al.  
1905 The long-term consequences of antibiotic therapy: Role of colonic short-chain fatty  
1906 acids (SCFAs) system and intestinal barrier integrity. *Plos One*. 2019;14(8); doi:  
1907 10.1371/journal.pone.0220642.

1908

1909 4. In general, the abstract could be re-written to describe the results from a higher  
1910 level, rather than just listing the altered genes. Close the abstract with a statement  
1911 connecting the paper results to the broader scientific field.

1912 **Response:** We appreciate your valuable and helpful comment. According to your  
1913 suggestion, we have rewritten the abstract. The rewritten content links the results of  
1914 the paper with the broader scientific field. The revised content is as follows. (Page 2,  
1915 line: 25-59)

1916 Probiotics can effectively improve ulcerative colitis (UC), but the mechanism is still  
1917 unclear. Here, shotgun metagenomic and transcriptome analyses were performed to  
1918 explore the therapeutic effect and the mechanism of the probiotic *lactobacillus*  
1919 *plantarum* HNU082 (Lp082) on UC. The results showed that Lp082 treatment  
1920 significantly ameliorated dextran sulfate sodium (DSS) -induced UC in mice, which  
1921 was manifested as increases in body weight, water intake, food intake, colon length,  
1922 and decreases in disease activity index (DAI), immune organ index, inflammatory  
1923 factors, and histopathological scores after Lp082 intake. An in-depth study discovered  
1924 that Lp082 could improve the intestinal mucosal barrier and relieve inflammation by  
1925 co-optimizing the biological barrier, chemical barrier, mechanical barrier and immune

1926 barrier. Specifically, Lp082 rebuilt the biological barrier by regulating the intestinal  
1927 microbiome and increasing the production of short-chain fatty acids (SCFAs). Lp082  
1928 improved the chemical barrier by reducing intercellular cell adhesion molecule-1,  
1929 vascular cell adhesion molecule and increasing goblet cells and mucin2. Lp082  
1930 ameliorated the mechanical barrier by increasing the zonula occludens-1 (ZO-1),  
1931 zonula occludens-2 (ZO-2), and occludin while decreasing claudin-1 and claudin-2.  
1932 Lp082 optimized the immune barrier by reducing the content of IL-1 $\beta$ , IL-6, TNF- $\alpha$ ,  
1933 MPO, IFN- $\gamma$  and increasing the IL-10, TGF- $\beta$ 1, and TGF- $\beta$ 2, inhibiting the NF-kB  
1934 signalling pathway. Taken together, probiotic Lp082 can play a protective role in a  
1935 DSS-induced colitis mouse model by protecting the intestinal mucosal barrier,  
1936 attenuating the inflammatory response, and regulating microbial imbalance. This  
1937 study provides support for the development of probiotic-based microbial products as  
1938 an alternative treatment strategy for UC.

1939

#### 1940 Importance

1941 Many studies have focused on the therapeutic effect of probiotics on UC, but few  
1942 studies have paid attention to the mechanism of probiotics, especially the therapeutic  
1943 effect. This study suggests that Lp082 has a therapeutic effect on colitis in mice. Its  
1944 mechanisms of action include protect the mucosal barrier and actively modulate the  
1945 gut microbiome, modulate inflammatory pathways and reduce neutrophil infiltration.  
1946 Our study enriches the mechanism and provides a new prospect for probiotics in the  
1947 treatment of colitis, helps to deepen the understanding of the intestinal mucosal barrier,  
1948 and provides guidance for the future probiotic treatment of human colitis.

1949 Keywords: Lactobacillus plantarum HNU082, ulcerative colitis, intestinal mucosal  
1950 barrier, short chain fatty acid, transcriptome, shotgun metagenome, cytokine

1951

1952 5. As written, lines 72-73 suggest Yucha has resistance to acid and bile salts, but I  
1953 assume that the authors mean Lp082 is resistant. Re-wording the sentence and adding  
1954 a clarification on what point the authors are trying to make about acid and bile salt  
1955 resistance would help alleviate the confusion here.

1956 **Response:** Thank you for your comment. We deeply agree with your suggestion. It is  
1957 true that we did not express it clearly. We apologize for the confusion caused to you.  
1958 According to your helpful advice, we have revised this sentence and the revised  
1959 content is as follows. (Page 4, line: 98-100)

1960 The strain of *Lactobacillus plantarum* HNU082 (Lp082) was originally isolated  
1961 from a traditional fermented food-fish tea of the Li people in Hainan Province,  
1962 China, which has a good safety profile and tolerance to acids and bile salts [1].

1963

#### 1964 **Reference**

1965 1. Zhang J, Wang X, Huo D, Li W, Hu Q, Xu C, et al. Metagenomic approach  
1966 reveals microbial diversity and predictive microbial metabolic pathways in Yucha, a  
1967 traditional Li fermented food. *Scientific Reports*. 2016;6; doi: 10.1038/srep32524.

1968

1969 6. Referring to lines 77-92: The authors interchange physiological results with  
1970 techniques as if they are the same things. Before describing the specific things you  
1971 were evaluating, describe what you were looking for at a high level. Then separate  
1972 physiological indicators from methods (e.g., rather than say, "evaluated physiological  
1973 indexes and shotgun metagenomic sequencing," use language like "evaluated  
1974 inflammation, microbial community composition and activity...using ELISA,  
1975 immunohistochemistry, metagenomic sequencing, and RNA-seq."

1976 **Response:** We appreciate your valuable and helpful comment. We deeply agree with  
1977 your suggestion. We do indeed have a language problem on this issue which created  
1978 confusion. According to your helpful advice, we have changed this sentence and other  
1979 places in the article. The revised content is as follows. (Page 23, line: 666-671)

1980 After the UC model was established by DSS, mice were given Lp082 by gavage to  
1981 observe the therapeutic effect of the bacteria on DSS-induced UC.. Various tissue  
1982 samples, including immune organs, serum, proximal colon, fecal, cecal contents,  
1983 distal colon, and other tissues, were collected. Techniques such as ELISA,  
1984 immunohistochemistry, metagenomic sequencing, and RNA-seq were used to assess  
1985 inflammation, microbial community composition, and gene expression. (Fig. 1a).



1986

1987 7. Potentially incorrect information: Lines 97-98 days and scores do not line up with  
1988 the data reported in figure 1B.

1989 **Response:** Thank you for your comment. We are very sorry for our incorrect writing.  
1990 We apologize for the confusion caused to you. We have redescribed **Fig. 1b**, and the  
1991 modified contents are as follows. (Page 6, line: 153-168)

1992 The results showed that from 1 to 7 days, the water intake, food intake, and body  
1993 weight of the DSS group, the Lp082 group, and the SASP group all showed a similar  
1994 degree of gradual decrease, and these three groups were all significantly different  
1995 from the Control group on day 7 ( $p < 0.05$ ), which may be because these three groups  
1996 were all under the same DSS modeling conditions on days 0-7. Then on the 8th to  
1997 15th day, the water intake, food intake, and body weight of the DSS group were still  
1998 decreasing, but the water intake, food intake, and body weight of Lp082 and SASP  
1999 group gradually increased. Specifically, the water and food intake of the Lp082  
2000 combined SASP group increased significantly from day 9 ( $p < 0.05$ ), and body weight  
2001 increased significantly from day 12 ( $p < 0.05$ ). The DAI index of the DSS group,  
2002 Lp082 group, and SASP group increased significantly ( $p < 0.05$ ) from the third day  
2003 compared with the Control group. After stopping DSS gavage on the 8th day, the DAI  
2004 index of the DSS self-healing group still increased, while that of the Lp082 group and  
2005 SASP group gradually decreased from the 10th day, and the degree of decrease in the  
2006 Lp082 group was greater than that in the SASP group (**Fig. 1b**).

2007

2008 8. Abbreviations should be described in the text as they arise, not in an additional  
2009 section at the end of the paper (page 20).

2010 **Response:** We are grateful for the suggestion. Thank you very much for pointing out  
2011 our problem, we deeply agree with your suggestion. According to your helpful advice,  
2012 we have corrected this by adding a description of abbreviations to the article.

2013

2014 9. After revising the manuscript, a thorough and detailed assessment and correction of  
2015 sentence structure would improve the readability of the paper dramatically.

2016 **Response:** We appreciate the reviewer's attention to the flaws of our text. After  
2017 revising the manuscript, we have made a comprehensive and careful assessment and  
2018 correction of the sentence structure and carefully checked the full text. The language  
2019 presentation was improved with assistance from a native English speaker with an  
2020 appropriate research background.

2021

2022 10. Abbreviations, capitalization, italics, and spacing are inconsistent throughout and  
2023 should be fixed for a final draft. E.g. Lp082(most commonly used in the draft)/Lp082  
2024 (lines 78-79) or HNU082 (correct)/HNU082 (line 23).

2025 **Response:** Thank you for your comment. We have carefully checked abbreviations,  
2026 capitals, italics and spaces. We tried our best to improve the manuscript and made  
2027 some changes in the manuscript. These changes will not influence the content and  
2028 framework of the paper. And here we did not list the changes but marked in yellow in  
2029 revised paper.

2030

2031 11. Review your usage of "prove" in your manuscript (notably in the discussion  
2032 section) as the experiments presented provide largely correlative data.

2033 **Response:** Thank you for your comment and we have corrected this error and used  
2034 the word "prove" more carefully. We also carefully checked the text to ensure the  
2035 accuracy of our other words.

2036

2037 Once again, we thank you for the time you put into reviewing our paper. We have  
2038 worked hard to answer your questions and look forward to meeting your expectations.  
2039 If you have any dissatisfaction, please communicate with us, and we will make  
2040 changes and improvements as quickly as possible. We are very grateful for your effort  
2041 in reviewing our paper and your positive feedback. Your evaluation of our work is  
2042 precise, and your dedication is commendable. Since your input is invaluable for future  
2043 publications, we would like to expressly thank you for your contribution.

2044

2045

2046

2047

2048

2049

2050

2051 Reviewer #2 (Public repository details (Required)):

2052 metagenomics sequencing and metabolome data are needed to deposit at a repository.

2053 **Response:** We really appreciate your reminder from the bottom of our hearts. We are  
2054 very sorry for our negligence of metagenome and transcriptome raw data. We have  
2055 uploaded the metagenomic and transcriptome raw data, and the modifications in the  
2056 manuscript have been highlighted. (Page 27, Line: 791-792)

2057 The sequence data reported in this paper have been deposited in the NCBI  
2058 database (metagenomic sequencing data and transcriptome sequencing  
2059 data:PRJNA812272).

2060 As is customary, our data will be made public after the article is received.

2061

2062 Reviewer #2 (Comments for the Author):

2063 **Response:** We appreciate the time and effort you dedicated to providing feedback on  
2064 our manuscript and are grateful for the insightful comments and valuable  
2065 improvements to our manuscript. We have discussed your comments carefully and we  
2066 sincerely accept the suggestions. Your comments provided valuable insights to refine  
2067 its contents and analysis. In this document, we try to address the issues raised as best  
2068 as possible. All revisions in the manuscript have been highlighted in yellow. You can  
2069 kindly find the point-to-point responses to reviewers' comments in the following text.  
2070 We thoroughly double-checked the manuscript. For detail, please see the following  
2071 answers.

2072

2073 Major comments:

2074 1. Authors claim that "we chose Lp082 to study the mechanism of probiotics in  
2075 preventing UC", however, the animal was treated with various reagents followed by

2076 DSS challenge. Please explain how this setting could serve well for assessing the  
2077 effects of probiotics on prevention UC? Authors should discriminate the difference  
2078 between "prevention" and "treatment", and pay more attention for accuracy of  
2079 wording.

2080 **Response:** We appreciate your valuable and helpful comment. We apologize for the  
2081 language problems in the original manuscript. The language presentation was  
2082 improved with assistance from a native English speaker with appropriate research  
2083 background. We apologize for the confusion and inconvenience caused to you. In fact,  
2084 we are studying the effect of Lp082 in the treatment of UC. We used DSS to establish  
2085 a model of UC and then treated it with Lp082. We have changed the sentence you  
2086 mentioned above to: So the Lp082 strain becomes a good choice for the study of  
2087 *lactobacillus plantarum* in the treatment of UC. The changes have been highlighted in  
2088 the article. We have carefully checked the wording of the full text and corrected the  
2089 preventive effect to the therapeutic effect. Thank you very much for pointing this out.  
2090 It was very helpful.

2091

2092 2. Basically only one biological repeat was conducted in this study. At least two  
2093 biological repeats are acceptable for this purpose. Please repeat one more animal  
2094 assay during next round of revision.

2095 **Response:** We appreciate your valuable and helpful comment. Thank you very much  
2096 for pointing out this issue. It is true that we did not express clearly. In fact, we set up 6  
2097 biological replicates for each group. According to your helpful suggestions, we have  
2098 carefully checked the whole paper, and added descriptions of sample size and number  
2099 of repeats in material and methods, legends and corresponding places in the article.  
2100 The changes have been highlighted in the text in yellow. The rewritten content is  
2101 more detailed, and the details are as follows:

2102 After the experiment, the spleen, liver, kidney and colon of 8 mice were selected from  
2103 each group for observation and measurement. (Page 6, line: 170-172)

2104

2105 To further evaluate the effects of Lp082 on inflammatory cytokines in mice with

2106 colitis, serum of 6 mice in each group was randomly collected after the experiment,  
2107 and the levels of pro-inflammatory cytokines TNF- $\alpha$ , IL-1 $\beta$ , IFN- $\alpha$ , IL-6, MPO and  
2108 anti-inflammatory cytokines IL-10 were detected by ELISA kit. (Page 8, line:  
2109 208-213)

2110

2111 At the end of the experiment, the 1cm portion of the distal colon of 6 mice in each  
2112 group was selected randomly for HE staining, and histopathological score and  
2113 intestinal wall thickness were further measured ( $n=6$ ). (Page 8, line: 220-224)

2114

2115 At the end of modeling (day 7 of the experiment), feces of 6 mice in each group were  
2116 randomly selected for metagenomic sequencing, and at the end of treatment (day 15  
2117 of the experiment), feces of 6 mice in each group were selected for metagenomic  
2118 sequencing, to observe the effects of DSS and Lp082 on the intestinal microecology  
2119 of mice. (Page 9, line: 258-262)

2120

2121 To prove the above findings, we further used gas chromatography-mass spectrometry  
2122 (GC-MS) to detect the content of SCFAs in cecal contents of 6 mice in each group.  
2123 (Page 11, line: 308-309)

2124

2125 At the end of the experiment, 6 mice from each group were randomly selected for  
2126 colon transcriptome sequencing, and the volcanic map was drawn based on the  
2127 preliminary gene distribution analysis results. (Page 13, line: 350-352)

2128

2129 C57BL/6J mice aged 7 weeks were randomly divided into 4 groups: control group  
2130 ( $n=8$ ), dextran sulfate sodium (DSS) group ( $n=8$ ), lactobacillus plantarum HNU082  
2131 (Lp082) group ( $n=8$ ), and salazosulfapyridine (SASP) group ( $n=8$ ). (Page 23, line:  
2132 659-661)

2133

2134 After the mice were euthanized, the colon length of 8 mice in each group was  
2135 measured, the weight of spleen, liver, and kidney of 8 mice in each group was

2136 measured. (Page 23, line: 677-679)

2137

2138 Before euthanasia, 6 mice were randomly selected from each group, and blood was  
2139 collected from the orbital venous plexus by a capillary tube. (Page 24, line: 686-687)

2140

2141 Finally, the levels of interleukin-1beta (IL-1 $\beta$ ), interleukin-6 (IL-6), interleukin-10  
2142 (IL-10), interleukin-17A (IL-17A), interferon-gamma (IFN- $\gamma$ ), Tumor necrosis  
2143 factor-alpha (TNF- $\alpha$ ), and Myeloperoxidase (MPO) in the serum of 6 randomly  
2144 selected mice from each group were measured using the corresponding ELISA kits  
2145 (X-Y Biotechnology, Shanghai, China), as previously described. (Page 24, line:  
2146 690-694)

2147

2148 After euthanasia, the distal 1cm colons of 6 mice in each group were randomly  
2149 selected for HE staining section, histopathological score, and intestinal wall thickness  
2150 measurement. (Page 24, line: 697-699)

2151

2152 On the other hand, 8 mice were selected from each group, and their colonic tissues  
2153 were labeled with mucin 2 and ZO-1 antibodies, respectively [75], for further  
2154 immunofluorescence staining (Servicebio, Wuhan, China). (Page 25, line: 710-712)

2155

2156 Six mice were randomly selected at two time points (day 7 and day 15 of the  
2157 experiment) for metagenomic sequencing of feces. (Page 25, line: 728-729)

2158

2159 At the end of the experiment, the cecal contents of 6 mice from each group were  
2160 randomly selected for SCFAs determination, and the specific steps were as follows:  
2161 (Page 26, line: 742-743)

2162

2163 At the end of the experiment, colon tissues of 6 mice from each group were randomly  
2164 selected for RNA sequencing. (Page 26, line: 757-758)

2165

2166 We consider our results to be credible on the premise of 6 biological replicates per  
2167 group. We have carefully reviewed the full text and supplemented descriptions of data  
2168 volumes and biological replicates where measurement data appeared. Modifications in  
2169 the article are highlighted in yellow.

2170

2171 3. Please improve layouts of figures, and pay attention to size, location of symbols.

2172 **Response:** We appreciate your valuable and helpful suggestion. According to the your  
2173 comment, we have gone through all the images carefully and refined the layout, size  
2174 and placement of symbols.

2175

2176 4. Please improve the language and grammar.

2177 **Response:** We apologize for the language problems in the original manuscript. The  
2178 language presentation was improved with assistance from a native English speaker  
2179 with an appropriate research background. We deeply appreciate your valuable and  
2180 helpful comments.

2181

2182 5. Please provide the H&E staining results for entire swiss roll in figure 2.

2183 **Response::** We appreciate your valuable and helpful comment. Indeed, our slicing  
2184 pictures that are not in line with the rules. We supplement the full slicing results of  
2185 40X and use this to zoom in at 100X and 200X. Thank you very much for your  
2186 suggestion; we will pay more attention in the following writing.

2187

2188 6. Authors claim that "that Lp082 could improve UC by regulating gut microbiota,  
2189 intestinal mucosal barrier, inflammatory pathways and neutrophil infiltration", please  
2190 provide direct evidence to support Lp082 effects on "mucosal barrier". Manuscript  
2191 shows the transcriptome data, however, transcriptome analysis on host genes are far  
2192 away from real expression and function.

2193 **Response:** We appreciate your valuable and helpful comment. The pathogenesis of  
2194 UC is the result of the combined effect of genetically susceptible hosts and the  
2195 environment, and its common pathological outcome is the damage of the structure and

2196 function of the intestinal mucosal barrier. The intestinal mucosal barrier is damaged,  
2197 resulting in an increase in the permeability of the intestinal epithelial barrier, and  
2198 further stimulation of intestinal contents, bacteria, and toxins promotes the immune  
2199 response to intestinal inflammation. The normal intestinal mucosal barrier consists of  
2200 mechanical barrier, chemical barrier, immune barrier, and biological barrier. The  
2201 chemical barrier refers to the glue-like mucin layer covering the surface of intestinal  
2202 epithelial cells, which is mainly composed of MUC-2 secreted by goblet cells,  
2203 digestive juices, and bacteriostatic substances produced by normal parasitic bacteria  
2204 in the intestinal lumen [1]. The mechanical barrier is the most important part of the  
2205 intestinal mucosal barrier. Its structural basis is the intestinal mucosal epithelial cells  
2206 and the tight junctions (TJ) between the epithelial cells [2]. The immune barrier is  
2207 associated with immune cells, and inflammatory factors [3]. The biological barrier is a  
2208 normal intestinal colony of bacteria that is resistant to colonization by foreign strains  
2209 [4]. The results of the study found that Lp082 can improve the intestinal mucosal  
2210 barrier by synergistically optimizing the biological barrier, chemical barrier,  
2211 mechanical barrier and immune barrier, thereby alleviating UC. Specifically, We  
2212 found that Lp082 rebuilt the biological barrier by regulating the intestinal microbiome  
2213 and increasing the SCFAs. Lp082 improved the chemical barrier by reducing ICAM-1,  
2214 VCAM, and increasing goblet cells and mucin2. Lp082 ameliorated the mechanical  
2215 barrier by increasing the ZO-1, ZO-2, and occludin and decreasing claudin-1 and  
2216 claudin-2. Lp082 optimized the immune barrier by reducing the content of IL-1 $\beta$ ,  
2217 IL-6, TNF- $\alpha$ , MPO, IFN- $\gamma$  and increasing the IL-10, TGF- $\beta$ 1, and TGF- $\beta$ 2. From the  
2218 above four aspects, we demonstrated that Lp082 can indeed improve the "intestinal  
2219 mucosal barrier" to treat DSS-induced UC.

2220 This result is not only supported by transcriptomic data, we have indeed done a  
2221 lot of experiments and validation. First, we studied some basic indicators and found  
2222 that Lp082 could not only significantly inhibit the decrease of body weight, water  
2223 intake and food intake induced by DSSS in mice, but also significantly inhibit the  
2224 increase of DAI and immune organ index induced by DSSS, as well as the decrease of



2225 colon length caused by DSS (**Fig. 1a-1d**). Second, we measured the protein content of  
2226 six inflammatory cytokines in mouse serum, and found that Lp082 could significantly  
2227 reduce the increase of IL-1 $\beta$ , IL-6, TNF- $\alpha$ , MPO, IFN- $\gamma$  induced by DSS, and increase  
2228 the protein content of IL-10 in mice (**Fig. 1e**). Third, we performed HE staining  
2229 section experiment and immunofluorescence protein experiment. The results showed  
2230 that Lp082 could not only improve the crypt infiltration, goblet cell loss and intestinal  
2231 mucosal ulcer induced by DSS, but also could reduce the increase of histopathology  
2232 score caused by DSS and reduce the loss of ZO-1 and MUC-2 proteins caused by  
2233 DSS (**Fig. 2a-2g**). Fourth, we collected fecal samples on day 7 for metagenomic  
2234 sequencing. The results of Shotgun metagenomic data analysis showed that Lp082  
2235 could increase  $\alpha$ -diversity and  $\beta$ -diversity, reduce the differences in species  
2236 composition, increase the content of beneficial bacteria and inhibit the abundance of  
2237 harmful bacteria in mice (**Fig. 3a-3d**). Fifth, we used gas chromatography-mass  
2238 spectrometry to determine the content of SCFAs in the intestinal contents of mice, and  
2239 found that Lp082 could significantly inhibit the reduction of acetic acid, propionic  
2240 acid, butyric acid, isobutyric acid and valeric acid induced by DSS, and restore the  
2241 content of SCFAs in mice (**Fig. 4b**). Sixth, we sequenced the transcriptome of colon  
2242 tissue, and the results showed that Lp082 not only affected gene expression  
2243 distribution, but also affected inflammation and cancer-related and KEGG,GO-BP  
2244 pathways (**Fig. 5a-5g**). These experiments provide data support for our derivation,  
2245 because the study did integrate metagenomics, transcriptomics, proteomics, HE  
2246 stained sections, immunofluorescent proteins and other experimental data, and found  
2247 that Lp082 can modulate the immune, chemical, mechanical and biological barriers,  
2248 which means that Lp082 can improve the intestinal mucosal barrier. Our data were  
2249 not less than 6 replicates in each group, and our data were absolutely reliable and  
2250 sufficient to support the results of our paper.

2251       Maybe we didn't describe it very well, so based on your suggestion, we have  
2252 rewritten the discussion section to more clearly describe the improvement effect of  
2253 Lp082 on the intestinal mucosal barrier, and the rewritten content is as follows: (Page

2254 16, line: 459-637)

## 2255 DISCUSSION

2256 The normal intestinal mucosal barrier is composed of mechanical, chemical immune  
2257 and biological barriers. The Lp082 has good efficacy in treating UC, which motivates  
2258 us to explore further its mechanism of action in the treatment of UC. The results of  
2259 the study found that Lp082 can improve the intestinal mucosal barrier by  
2260 synergistically optimizing the biological, chemical, mechanical and immune barriers,  
2261 thereby alleviating UC. In addition to optimizing the intestinal mucosal barrier,  
2262 regulating inflammatory pathways and influencing neutrophil infiltration are potential  
2263 mechanisms of Lp082 in treating UC.

### 2264 Lp082 improved chemical barrier

2265 The chemical barrier refers to the glue-like mucin layer covering the surface of  
2266 intestinal epithelial cells, which is mainly composed of MUC-2 secreted by goblet  
2267 cells, digestive juices and bacteriostatic substances produced by normal parasitic  
2268 bacteria in the intestinal lumen [1]. The chemical barrier plays an important role in  
2269 isolating the internal and external environment of the intestinal tract, lubricating the  
2270 intestinal mucosa, and inhibiting the entry of harmful substances in the intestinal  
2271 lumen [5]. The intestinal mucosal wall thickness was significantly increased in the  
2272 DSS group, whereas it was significantly decreased after Lp082 ingestion (**Fig. 2c**). In  
2273 DSS-induced UC, the thicker the intestinal mucosal wall, indicating more severe  
2274 inflammation. In addition, the H&E staining result showed that the number of goblet  
2275 cells decreased in the DSS group (red arrow), whereas the number of goblet cells  
2276 increased (yellow arrow) after Lp082 ingestion (**Fig. 2a**). The immunofluorescent  
2277 protein content of MUC-2, which is mainly secreted by goblet cells, was significantly  
2278 decreased in the DSS group (**Fig. 2d**), and the areal density of MUC-2 (**Fig. 2f**) and  
2279 the mRNA expression of MUC-2 were also significantly decreased in the DSS group  
2280 (**Fig. 5c**), while the immunofluorescence protein content, areal density and mRNA  
2281 expression of MUC-2 all increased in the Lp082 group,  
2282 Sun et al. [6] observed the same phenomenon that *lactobacillus plantarum 12* can  
2283 repair the intestinal mucosal chemical barrier by increasing the content of MUC-2.

2284 Burger-van Paassen et al. [7] found that intake of SCFAS could increase the  
2285 expression abundance of MUC-2 mRNA in cells. The mRNA expressions of ICAM-1  
2286 and VCAM-1 were significantly decreased after Lp082 intake. Taniguchi et al. [8]  
2287 found that anti-ICAM-1 treatment significantly attenuated colonic mucosal damage,  
2288 while Philpott et al. [9] found that adhesion molecules ICAM-1 & VCAM-1 induced  
2289 intestinal mucosal lesions. Lp082 has been shown to be effective in relieving  
2290 intestinal mucosal lesions (i.e., reduced ulceration and inflammatory cell infiltration  
2291 caused by DSS). So, we speculate that Lp082 reduces mucosal lesions by reducing  
2292 ICAM-1 and VCAM. The above results showed that probiotic Lp082 increased the  
2293 MUC-2 content in the mucus layer by restoring the number of goblet cells, relieved  
2294 the intestinal mucosal damage caused by ICAM-1 and VCAM-1, so as to repaired the  
2295 chemical barrier.

2296 Lp082 improved mechanical barrier

2297 The mechanical barrier is the most important part of the intestinal mucosal  
2298 barrier. Its structural basis is the intestinal mucosal epithelial cells and the tight  
2299 junctions (TJ) between the epithelial cells [2]. The mechanical barrier can effectively  
2300 prevent harmful substances such as bacteria and endotoxins from entering the blood  
2301 through the intestinal mucosa.iers The aberrant structure of tight junction (TJ)  
2302 proteins between intestinal epithelial cells, such as the reduction of ZO-1, ZO-2, and  
2303 occludin, is one of the critical factors leading to the disruption of the gut mechanical  
2304 barrier in UC patients [10]. Several studies have identified TJ protein as a new target  
2305 for the current treatment of UC [11]. Because Lp082 excellently improved  
2306 histopathology, we speculated that Lp082 also has a regulatory effect on TJ molecules.  
2307 To this end, we analyzed major TJ proteins, including ZO-1, ZO-2, occludin. As  
2308 expected, the mRNA expression and immunofluorescence protein content of ZO-1  
2309 and the mRNA expression of ZO-2 and occludin were significantly decreased in  
2310 DSS-induced UC mice but improved in the Lp082 treatment group. These are  
2311 consistent with the findings of Cordeiro et al. [12] that ZO-1 and ZO-2 were  
2312 significantly decreased in UC but increased after probiotic Minas Frescal cheese  
2313 intake, indicating that the improvement of the mechanical barrier by regulating TJ

2314 may be one of the mechanisms by which probiotic Lp082 exerts anti-UC. In addition,  
2315 the mRNA expression of another particular tight junction protein, ICAM-1 and  
2316 VCAM-1, was increased in the DSS group. It is consistent with the findings of  
2317 elevated ICAM-1 and VCAM-1 in IBD patients in clinical studies [13]. Mitselou et al.  
2318 [14] found that the adhesion molecules ICAM-1 and VCAM-1 induced intestinal  
2319 mucosal injury. Taniguchi et al. [8] found that anti-ICAM-1 treatment attenuated  
2320 colonic mucosal injury. It has been reported that ICAM-1 and VCAM-1 can increase  
2321 the permeability of intestinal mucosa [15]. Interestingly, the mRNA expression of  
2322 ICAM-1 and VCAM-1 was found to decrease after Lp082 ingestion. Therefore, it can  
2323 be thought that the alleviation of UC by Lp082 may be due to down-regulation of  
2324 ICAM-1, VCAM-1 and increase protein quantity and mRNA expression of  
2325 ZO-1, ZO-2, so as to reduce intestinal mucosal permeability, thereby inhibiting the  
2326 entry of harmful bacteria and undigested food and toxins into the body and reducing  
2327 inflammation. These results suggest that Lp082 repairs the intestinal mechanical  
2328 barrier by regulating TJ.

2329 Lp082 improved the immune barrier

2330 Although the exact etiology of UC is complex and uncertain, studies suggest that  
2331 the NF- $\kappa$ B pathway plays a vital role in the pathogenesis of UC [3]. Our study has  
2332 proved that Lp082 inhibits the NF- $\kappa$ B pathway by down-regulating the mRNA  
2333 expression of NF- $\kappa$ B2, NF- $\kappa$ B1, COX-2, Rel $\alpha$ , Toll4, iNOS, and that NF- $\kappa$ B can also  
2334 regulate inflammation by regulating cytokines [16]. Therefore, it can be suggested  
2335 that Lp082 also has a specific regulatory effect on cytokines. To confirm this, we  
2336 analyzed the cytokines associated with NF- $\kappa$ B. As expected, we observed that the  
2337 mRNA expression level content of pro-inflammatory cytokines (TNF- $\alpha$ , IL-1 $\beta$ , and  
2338 IL-6) were significantly increased in the DSS group but significantly decreased in the  
2339 Lp082 group, It is interesting to note that the protein levels of TNF- $\alpha$ , IL-1 $\beta$ , and IL-6  
2340 detected by elisa kit were also increased in the DSS group and decreased after Lp082  
2341 intake. Among them, TNF- $\alpha$  can promote the proliferation and differentiation of T  
2342 cells and increase intestinal inflammation [17]. The upregulation of IL-1 $\beta$  is involved  
2343 in the recruitment and retention of leukocytes in inflamed tissues and can activate

2344 innate immune lymphocytes [18]. IL-6 activates NF- $\kappa$ B to regulate the dextran sulfate  
2345 sodium-induced colitis in mice [19]. The above results indicate that Lp082 alleviates  
2346 UC by inhibiting the levels of pro-inflammatory factors (TNF- $\alpha$ , IL-1 $\beta$ , and IL-6).  
2347 Interestingly, we also found that the mRNA expressions of anti-inflammatory  
2348 cytokines IL10, TGF-1, and TGF-2 were significantly decreased in the DSS group but  
2349 increased in the Lp082 group. IL-10 protein levels measured by elisa kit also decreased  
2350 in the DSS group and increased in the Lp082 group. Surprisingly, IL10, TGF-1, and  
2351 TGF-2 were shown to activate Treg and anti-inflammatory macrophages to alleviate  
2352 UC [20]. And Sato et al. [21] also found that the loss of IL-10 spontaneously gave rise  
2353 to IBD, and Hume et al. [22] found that TGF- $\beta$ 1 and TGF- $\beta$ 2 could dramatically  
2354 relieve intestinal inflammation in DSS-induced colitis mice. These results suggest that  
2355 Lp082 alleviates UC by increasing the levels of anti-inflammatory factors IL10,  
2356 TGF-1, and TGF-2. We further analyzed the specific regulatory effects of Lp082 on  
2357 intestinal mucosal immunity. In addition to inflammatory factors, we also noticed that  
2358 a heme protein, MPO, was significantly reduced in the Lp082 group. Trevisin et al.  
2359 [23] found that MPO caused UC by producing cytokines and hypochlorite and that  
2360 MPO in the colon of UC patients is mainly produced by neutrophil infiltration [24].  
2361 Interestingly, this is consistent with the fact that the DSS group had a severe  
2362 neutrophil infiltration in this study. However, neutrophil infiltration and MPO content  
2363 were significantly decreased in Lp082 group. This shows that Lp082 alleviates UC by  
2364 reducing neutrophil infiltration and its secreted MPO content. In a nutshell, our results  
2365 suggest that Lp082 may play an anti-UC effect by inhibiting the NF- $\kappa$ B pathway,  
2366 down-regulating pro-inflammatory cytokines, and up-regulating anti-inflammatory  
2367 cytokines, reducing MPO content, thereby maintaining immune balance and  
2368 protecting the immune barrier.

2369       The mucosal immune system of the intestine mainly consists of Peyer's patch  
2370 and lamina propria under enterocyte [25]. The Peyer's patch can deliver captured  
2371 antigens to dendritic cells [26]. Then dendritic cells can not only trigger T  
2372 cell-mediated cellular immunity and B cell-mediated humoral immunity by presenting  
2373 antigens but also affect lamina propria immunity [27]. Combining previous studies,

2374 we found that DSS causes inflammation through the following six ways. First, gut  
2375 permeability increases, and harmful substances enter to activate innate immunity, such  
2376 as stimulating innate immune cells to produce TNF- $\alpha$ , IL-1 $\beta$ , and IL-6 [28]. Second,  
2377 regulatory T cells produce less IL-10 and have a less inhibitory effect on effector T  
2378 cells, resulting in the phenomenon of effector T and regulatory T cell dysregulation in  
2379 UC patients [29]. Third, effector T cells promote B cell-mediated humoral immunity  
2380 by promoting the secretion of IFN- $\gamma$  and L-17A [30]. Fourth, effector T cells carried  
2381 out immune cell recruitment and formed a vicious immune cycle with chemokines  
2382 and cytokines [31]. Fifth, Peyer's patch recognizes antigens and presents them to other  
2383 immune cells through dendritic cells [26]. Sixth, antigen-activated neutrophils can  
2384 both secrete MPO and recruit more immune cells from the bloodstream to the site of  
2385 inflammation, further exacerbating inflammation [32] (**Fig. 6b**). Based on the above 6  
2386 reasons, we suggest that in addition to relieving inflammation by inhibiting the NF- $\kappa$ B  
2387 pathway, Lp082 can also regulate inflammatory factors to maintain the balance  
2388 between regulatory T cells and effector T cells to regulate intestinal mucosal  
2389 immunity, thus maintaining the intestinal mucosal barrier.

2390 Lp082 improved the biological barrier

2391 Numerous studies [23] have shown that probiotics improve the clinical outcome  
2392 of IBD patients by influencing host gut microbiota [4]. Herein, we performed a  
2393 shotgun metagenomic analysis to investigate whether Lp082 can improve gut  
2394 dysbiosis in the UC mice model. As expected, we observed that the intake of DSS  
2395 significantly reduced the shannon value but increased PCoA distance, a finding that is  
2396 consistent with Wang et al. [33]. The Shannon index reflects gut microbiota richness  
2397 and uniformity and is positively correlated with gut microbiota diversity, while the  
2398 PCoA distance reflects the difference in the structure of the gut microbiota between  
2399 different groups; the higher the PCoA value, the greater the difference in the gut  
2400 microbiota structure [34]. In particular, Lp082 treatment remarkably increased the gut  
2401 microbiota diversity and reduced gut microbiota structural differences in gut  
2402 microbiota, as shown by the cluster analysis and PCoA analysis. On the other hand,  
2403 Lp082 also optimized species composition; that is, the abundance of

2404 pro-inflammatory microbiota decreased in the Lp082 group, such as *Helicobacter*  
2405 *hepaticus*, a potential pathogen of colitis. Likewise, we observed an increasing trend  
2406 in the abundance of potential probiotics in the Lp082 group, such as *Bifidobacterium*  
2407 *pseudolongum* and *Bacteroides ovatus*, which reduces colonic inflammation [35],  
2408 *Parabacteroides distasonis*, which is negatively associated with obesity and diabetes  
2409 [36], *Akkermansia muciniphila* and *Lactobacillus reuteri*, a widely studied probiotic,  
2410 *Anaerotruncus sp G3 2012* and *Lactobacillus plantarum*, potential SCFAs-producing  
2411 bacteria [37]. The above results indicate that Lp082 is beneficial to optimizing the  
2412 diversity, structure, and composition of gut microbiota. After demonstrating that  
2413 Lp082 can increase the abundance of potential SCFAs-producing bacteria, further  
2414 analysis found that Lp082 can activate two SCFAs-producing microbial metabolic  
2415 pathways and the content of SCFAs. Subsequently, correlation analysis proved that  
2416 Lp082 may increase SCFAs by activating the SCFAs-producing metabolic pathway of  
2417 SCFAs-producing bacteria, so as to inhibit inflammation [38] and regulate host  
2418 physiological activity through SCFAs [39]. All of these suggest that Lp082 repaired  
2419 the microbial barrier by regulating the gut microbiome.

2420 In conclusions, the Lp082 has an exciting therapeutic effect on UC than SASP.  
2421 Also, shotgun metagenome and transcriptome analysis confirmed that Lp082 could  
2422 improve gut microbiota dysbiosis, protect intestinal mucosal barrier, regulate  
2423 inflammatory pathways, and affect neutrophil infiltration. These findings firmly  
2424 support and advocate the clinical translation of Lp082 in the treatment of UC. It can  
2425 be suggested that the application of gut microbiota and probiotics in the treatment of  
2426 UC should receive more attention. The findings of this study not only provide new  
2427 clues for revealing the complex mechanism of gut microbiota in relieving UC, but  
2428 also provide evidence for Lp082 as a potential gut microbiota regulator to treat UC.

## 2429 **References**

- 2430 1. Li XX, Wei B, Goodglick L, Wen T, Xia LJ, Braun J. Investigating Therapeutic  
2431 Approach of IBD Using Recombinant Glycoprotein Mucin2. *Faseb Journal*. 2009;23.
- 2432 2. Shi JL, Xie QG, Yue YX, Chen QX, Zhao LN, Evivie SE, et al. Gut microbiota  
2433 modulation and anti-inflammatory properties of mixed lactobacilli in dextran sodium

2434 sulfate-induced colitis in mice. *Food & Function*. 2021;12(11):5130-43; doi:  
2435 10.1039/d1fo00317h.

2436 3. Hu LH, Liu JY, Yin JB. Eriodictyol attenuates TNBS-induced UC through  
2437 repressing TLR4/NF-kB signaling pathway in rats. *Kaohsiung Journal of Medical*  
2438 *Sciences*. 2021;37(9):812-8; doi: 10.1002/kjm2.12400.

2439 4. Wang LA, Gao MX, Kang GB, Huang H. The Potential Role of Phytonutrients  
2440 Flavonoids Influencing Gut Microbiota in the Prophylaxis and Treatment of  
2441 Inflammatory Bowel Disease. *Frontiers in Nutrition*. 2021;8; doi:  
2442 10.3389/fnut.2021.798038.

2443 5. Fedorak RN. Understanding why probiotic therapies can be effective in treating  
2444 IBD. *Journal of clinical gastroenterology*. 2008;42 Suppl 3 Pt 1:S111-5; doi:  
2445 10.1097/MCG.0b013e31816d922c.

2446 6. Sun MY, Liu YJ, Song YL, Gao Y, Zhao FJZ, Luo YH, et al. The ameliorative  
2447 effect of *Lactobacillus plantarum*-12 on DSS-induced murine colitis. *Food & Function*.  
2448 2020;11(6):5205-22; doi: 10.1039/d0fo00007h.

2449 7. Burger-van Paassen N, Vincent A, Puiman PJ, van der Sluis M, Bouma J, Boehm  
2450 G, et al. Regulation of the intestinal mucin MUC2 expression by short chain fatty  
2451 acids: implications for epithelial protection. *Faseb Journal*. 2009;23.

2452 8. Taniguchi T, Tsukada H, Nakamura H, Kodama M, Fukuda K, Saito T, et al.  
2453 Effects of the anti-ICAM-1 monoclonal antibody on dextran sodium sulphate-induced  
2454 colitis in rats. *Journal of gastroenterology and hepatology*. 1998;13(9):945-9; doi:  
2455 10.1111/j.1440-1746.1998.tb00766.x.

2456 9. Philpott JR, Miner PB, Jr. Antisense inhibition of ICAM-1 expression as therapy  
2457 provides insight into basic inflammatory pathways through early experiences in IBD.  
2458 *Expert Opin Biol Ther*. 2008;8(10):1627-32; doi: 10.1517/14712598.8.10.1627.

2459 10. Edelblum KL, Turner JR. The tight junction in inflammatory disease:  
2460 communication breakdown. *Current Opinion in Pharmacology*. 2009;9(6):715-20; doi:  
2461 10.1016/j.coph.2009.06.022.

2462 11. Stio M, Retico L, Annese V, Bonanomi AG. Vitamin D regulates the  
2463 tight-junction protein expression in active UC. *Scandinavian Journal of*



2464 Gastroenterology. 2016;51(10):1193-9; doi: 10.1080/00365521.2016.1185463.

2465 12. Cordeiro BF, Alves JL, Belo GA, Oliveira ER, Braga MP, da Silva SH, et al.  
2466 Therapeutic Effects of Probiotic Minas Frescal Cheese on the Attenuation of UC in a  
2467 Murine Model. *Frontiers in Microbiology*. 2021;12; doi: 10.3389/fmicb.2021.623920.

2468 13. Nakamura S, Ohtani H, Watanabe Y, Fukushima K, Matsumoto T, Kitano A, et al.  
2469 In situ expression of the cell adhesion molecules in inflammatory bowel disease.  
2470 Evidence of immunologic activation of vascular endothelial cells. *Laboratory*  
2471 *investigation; a journal of technical methods and pathology*. 1993;69(1):77-85.

2472 14. Mitselou A, Grammeniatis V, Varouktsi A, Papadatos SS, Klaroudas A, Katsanos  
2473 K, et al. Immunohistochemical Study of Adhesion Molecules in Irritable Bowel  
2474 Syndrome: A Comparison to Inflammatory Bowel Diseases. *Advanced biomedical*  
2475 *research*. 2021;10:21; doi: 10.4103/abr.abr\_2\_20.

2476 15. Ruco LP, de Laat PA, Matteucci C, Bernasconi S, Sciacca FM, van der Kwast TH,  
2477 et al. Expression of ICAM-1 and VCAM-1 in human malignant mesothelioma. *The*  
2478 *Journal of pathology*. 1996;179(3):266-71.

2479 16. Bauer J, Namineni S, Reisinger F, Zoller J, Yuan DT, Heikenwalder M.  
2480 Lymphotoxin, NF-kappa B, and Cancer: The Dark Side of Cytokines. *Digestive*  
2481 *Diseases*. 2012;30(5):453-68; doi: 10.1159/000341690.

2482 17. Xiao B, Laroui H, Ayyadurai S, Viennois E, Charania MA, Zhang YC, et al.  
2483 Mannosylated bioreducible nanoparticle-mediated macrophage-specific TNF-alpha  
2484 RNA interference for IBD therapy. *Biomaterials*. 2013;34(30):7471-82; doi:  
2485 10.1016/j.biomaterials.2013.06.008.

2486 18. 김연하, 김유림, 김성중, 황호근, Choi S-C, 김경숙, et al. Rebamipide Protects  
2487 Colonic Damage Induced by Trinitrobenzene Sulfonic Acid (TNBS) via  
2488 Down-Regulation of TNF- $\alpha$ , IL-1 $\beta$ , and ICAM-1. *Anatomy and Cell Biology*.  
2489 2004;37(2):149-56.

2490 19. Zhou X, Liu H, Zhang J, Mu J, Zalan Z, Hegyi F, et al. Protective effect of  
2491 *Lactobacillus fermentum* CQPC04 on dextran sulfate sodium-induced colitis in mice  
2492 is associated with modulation of the nuclear factor-kappa B signaling pathway.  
2493 *Journal of Dairy Science*. 2019;102(11):9570-85; doi: 10.3168/jds.2019-16840.

- 2494 20. Mohammadnia-Afrouzi M, Hosseini AZ, Khalili A, Abediankenari S, Amari A,  
2495 Aghili B, et al. Altered microRNA Expression and Immunosuppressive Cytokine  
2496 Production by Regulatory T Cells of UC Patients. *Immunological Investigations*.  
2497 2016;45(1):63-74; doi: 10.3109/08820139.2015.1103749.
- 2498 21. Sato Y, Takahashi S, Kinouchi Y, Shiraki M, Endo K, Matsumura Y, et al. IL-10  
2499 deficiency leads to somatic mutations in a model of IBD. *Carcinogenesis*.  
2500 2006;27(5):1068-73.
- 2501 22. Hume GE, Fowler EV, Lincoln D, Eri R, Templeton D, Florin TH, et al.  
2502 Angiotensinogen and transforming growth factor beta1: novel genes in the  
2503 pathogenesis of Crohn's disease. *Journal of medical genetics*. 2006;43(10):e51; doi:  
2504 10.1136/jmg.2005.040477.
- 2505 23. Trevisin M, Pollock W, Dimech W, Savige J. Evaluation of a multiplex flow  
2506 cytometric immunoassay to detect PR3- and MPO-ANCA in active and treated  
2507 vasculitis, and in inflammatory bowel disease (IBD). *Journal of immunological*  
2508 *methods*. 2008;336(2):104-12; doi: 10.1016/j.jim.2008.03.012.
- 2509 24. Chin AC, Parkos CA. Neutrophil transepithelial migration and epithelial barrier  
2510 function in IBD: potential targets for inhibiting neutrophil trafficking. *Annals of the*  
2511 *New York Academy of Sciences*. 2006;1072:276-87; doi: 10.1196/annals.1326.018.
- 2512 25. Jonker MA, Hermsen JL, Sano Y, Heneghan AF, Lan JG, Kudsk KA. Small  
2513 intestine mucosal immune system response to injury and the impact of parenteral  
2514 nutrition. *Surgery*. 2012;151(2):278-86; doi: 10.1016/j.surg.2010.10.013.
- 2515 26. Li HS, Gelbard A, Martinez GJ, Esashi E, Zhang HY, Nguyen-Jackson H, et al.  
2516 Cell-intrinsic role for IFN-alpha-STAT1 signals in regulating murine Peyer patch  
2517 plasmacytoid dendritic cells and conditioning an inflammatory response. *Blood*.  
2518 2011;118(14):3879-89; doi: 10.1182/blood-2011-04-349761.
- 2519 27. Santucci L, Agostini M, Bruscoli S, Mencarelli A, Ronchetti S, Ayroldi E, et al.  
2520 GITR modulates innate and adaptive mucosal immunity during the development of  
2521 experimental colitis in mice. *Gut*. 2007;56(1):52-60; doi: 10.1136/gut.2006.091181.
- 2522 28. Debnath T, Kim DH, Lim BO. Natural Products as a Source of  
2523 Anti-Inflammatory Agents Associated with Inflammatory Bowel Disease. *Molecules*.

2524 2013;18(6):7253-70; doi: 10.3390/molecules18067253.

2525 29. Goldberg R, Scotta C, Cooper D, Nissim-Eliraz E, Nir E, Tasker S, et al.  
2526 Correction of Defective T-Regulatory Cells From Patients With Crohn's Disease by  
2527 Ex Vivo Ligation of Retinoic Acid Receptor-alpha. *Gastroenterology*.  
2528 2019;156(6):1775-87; doi: 10.1053/j.gastro.2019.01.025.

2529 30. Cook L, Stahl M, Han X, Nazli A, MacDonald KN, Wong MQ, et al. Suppressive  
2530 and Gut-Reparative Functions of Human Type 1 T Regulatory Cells. *Gastroenterology*.  
2531 2019;157(6):1584-98; doi: 10.1053/j.gastro.2019.09.002.

2532 31. Singh UP, Singh NP, Murphy EA, Price RL, Fayad R, Nagarkatti M, et al.  
2533 Chemokine and cytokine levels in inflammatory bowel disease patients. *Cytokine*.  
2534 2016;77:44-9; doi: 10.1016/j.cyto.2015.10.008.

2535 32. Zhou GX, Yu L, Fang LL, Yang WJ, Yu TM, Miao YL, et al. CD177(+)  
2536 neutrophils as functionally activated neutrophils negatively regulate IBD. *Gut*.  
2537 2018;67(6):1052-63; doi: 10.1136/gutjnl-2016-313535.

2538 33. Wang R, Chen T, Wang Q, Yuan XM, Duan ZL, Feng ZY, et al. Total Flavone of  
2539 *Abelmoschus manihot* Ameliorates Stress-Induced Microbial Alterations Drive  
2540 Intestinal Barrier Injury in DSS Colitis. *Drug Design Development and Therapy*.  
2541 2021;15:2999-3016; doi: 10.2147/dddt.S313150.

2542 34. Suchodolski JS, Markel ME, Garcia-Mazcorro JF, Unterer S, Heilmann RM,  
2543 Dowd SE, et al. The Fecal Microbiome in Dogs with Acute Diarrhea and Idiopathic  
2544 Inflammatory Bowel Disease. *Plos One*. 2012;7(12); doi:  
2545 10.1371/journal.pone.0051907.

2546 35. Yang C, Du Y, Ren D, Yang X, Zhao Y. Gut microbiota-dependent catabolites of  
2547 tryptophan play a predominant role in the protective effects of turmeric  
2548 polysaccharides against DSS-induced UC. *Food Funct*. 2021;12(20):9793-807; doi:  
2549 10.1039/d1fo01468d.

2550 36. Cai W, Xu JX, Li G, Liu T, Guo XL, Wang HJ, et al. Ethanol extract of propolis  
2551 prevents high-fat diet-induced insulin resistance and obesity in association with  
2552 modulation of gut microbiota in mice. *Food Research International*. 2020;130; doi:  
2553 10.1016/j.foodres.2019.108939.

2554 37. Wang J, Ji HF, Wang SX, Liu H, Zhang W, Zhang DY, et al. Probiotic  
2555 *lactobacillus plantarum* Promotes Intestinal Barrier Function by Strengthening the  
2556 Epithelium and Modulating Gut Microbiota. *Frontiers in Microbiology*. 2018;9; doi:  
2557 10.3389/fmicb.2018.01953.

2558 38. Wang SL, Zhang SY, Huang SM, Wu ZH, Pang JM, Wu YJ, et al. Resistant  
2559 Maltodextrin Alleviates Dextran Sulfate Sodium-Induced Intestinal Inflammatory  
2560 Injury by Increasing Butyric Acid to Inhibit Proinflammatory Cytokine Levels.  
2561 *Biomed Research International*. 2020;2020; doi: 10.1155/2020/7694734.

2562 39. Holota Y, Dovbynchuk T, Kaji I, Vareniuk I, Dzyubenko N, Chervinska T, et al.  
2563 The long-term consequences of antibiotic therapy: Role of colonic short-chain fatty  
2564 acids (SCFAs) system and intestinal barrier integrity. *Plos One*. 2019;14(8); doi:  
2565 10.1371/journal.pone.0220642.

2566

2567 **Minor comments:**

2568 1. Please provide line numbering.

2569 **Response:** We are grateful to the reviewer for pointing out this problem. We are very  
2570 sorry for our negligence with page numbers and line numbers. We have added the  
2571 page number and line number to the article. The title page is also called page 1, and  
2572 the first line of the title is line 1.

2573

2574 2. Figure 1a depicted the study design and methodology, which might be better to  
2575 merge into M&M part.

2576 **Response:** We appreciate your valuable and helpful comment. Thank you for pointing  
2577 out this problem. We deeply agree with the reviewer's opinion on this problem, and  
2578 we have moved the content of this part to M&M. The changes in the text are  
2579 highlighted in yellow. (Page 24, line: 676-681)

2580

2581 3. Information of study design and methodology are not appropriate present in Results  
2582 section. The tables or figures should be displayed at a consecutive and sequential  
2583 order. In current version figure S1b appeared ahead of S1a.

2584 **Response:** We appreciate your valuable and helpful comment. We have corrected this  
2585 problem and redescribed this part to make the article more coherent, and the rewritten  
2586 content is as follows: (Page 7, line: 166-200)

2587 In DSS-induced UC mice, the immune organ index gradually increased and the colon  
2588 length gradually shortened with increasing disease severity [1]. Therefore, we  
2589 measured the spleen, liver, kidney, and colon of the mice. The results showed that the  
2590 immune organ index of the DSS group was significantly increased ( $p < 0.05$ ), and the  
2591 immune organ index was significantly decreased after Lp082 intake ( $p < 0.05$ ) (**Fig.**  
2592 **1c**). The colon length of the mice in the DSS group was significantly decreased ( $p <$   
2593  $0.05$ ), and the colon length in Lp082 group was significantly increased ( $p < 0.05$ ) (**Fig.**  
2594 **1d**). In addition, we also observed that the intestinal contents of the colitis mice in the  
2595 DSS group were loose, unformed and there was blood in the intestinal lumen, while  
2596 the intestinal contents in the Lp082 and Control groups were clear particles, hard stool,  
2597 and no blood (**Fig. 1d**). The fecal morphology of the intestinal contents was similar to  
2598 the results observed in mouse feces on the buttocks of mice. The feces of the mice in  
2599 the DSS group were blood-red, and the feces were loose and unformed, while there  
2600 was no blood in the feces after Lp082 ingestion (**Fig. S1 a**).

2601 With the increase of disease degree, DSS-induced UC mice will have a worse mental  
2602 state, even abdominal pain, arch back, panic and other symptoms [2]. The mental state  
2603 of the mice was observed daily, and the results are shown in **Figure S1 b**. On the 7th  
2604 day of modeling, mice in the control group were in a normal state, with normal urine  
2605 and feces, shiny hair, active spirit, sensitive reaction, and increased body size.  
2606 However, mice in the BCD group had yellow and smelly urine, difficult defecation,  
2607 bloody stool, dark and fried hair, slow reaction and easy panic, arched back, and  
2608 reduced body size (**Fig. S1 b**). On the last day of treatment(Day 15), compared with  
2609 the arched back, retarded response, hematochezia, and lethargic in the DSS group, the  
2610 mental state of mice in the Lp082 and SASP groups gradually returned to normal,  
2611 with an active spirit, no arched back, no hematochezia and shiny hair (**Fig. S1 b**).  
2612 These results indicated that Lp082 intake could alleviate the symptoms of depression,  
2613 crouching, and untidy hair of mice in the DSS group in the middle and late stage of

2614 the experiment (**Fig. S1 b**).

2615 Studies have shown that under the condition of inflammation, the spleen of mice  
2616 induced by DSS will increase hyperemia and even appear infection blackening.  
2617 Therefore, we looked at the spleens of mice and found that the spleens of mice in the  
2618 DSS group were significantly larger and darker than those of mice in the normal  
2619 group. The spleens of mice in the Lp082 and SASP groups were smaller and redder  
2620 rather than black than those in the DSS group (**Fig. S1 c**).

## 2621 **Reference**

- 2622 1. Rodriguez-Nogales A, Algieri F, Garrido-Mesa J, Vezza T, Pilar Utrilla M,  
2623 Chueca N, et al. Differential intestinal anti-inflammatory effects of *Lactobacillus*  
2624 *fermentum* and *Lactobacillus salivarius* in DSS mouse colitis: impact on microRNAs  
2625 expression and microbiota composition. *Molecular Nutrition & Food Research*.  
2626 2017;61(11); doi: 10.1002/mnfr.201700144.
- 2627 2. Sun MY, Liu YJ, Song YL, Gao Y, Zhao FJZ, Luo YH, et al. The ameliorative  
2628 effect of *lactobacillus plantarum*-12 on DSS-induced murine colitis. *Food & Function*.  
2629 2020;11(6):5205-22; doi: 10.1039/d0fo00007h.

2630

2631 Once again, we thank you for the time you put into reviewing our paper, and we are  
2632 very grateful for your effort in reviewing our paper and your positive feedback. The  
2633 summary of our work as written by you is precise. Since your inputs have been  
2634 precious, we would like to acknowledge your contribution explicitly in the eventuality  
2635 of a publication.

October 7, 2022

Prof. Jiachao Zhang  
Hainan University  
Food Science  
58 renmin road  
Haikou, Hainan 570228  
China

Re: Spectrum01651-22R1 (Probiotics (*Lactobacillus plantarum* HNU082) supplementation relieves ulcerative colitis by affecting intestinal barrier functions, immunity-related genes expression, gut microbiota, and metabolic pathways in mice)

Dear Prof. Jiachao Zhang:

Thank you for submitting your manuscript to Microbiology Spectrum. As you will see your paper is very close to acceptance. Please modify the manuscript along the lines the reviewer has recommended. As these revisions are quite minor, I expect that you should be able to turn in the revised paper in less than 30 days, if not sooner. If your manuscript was reviewed, you will find the reviewers' comments below.

When submitting the revised version of your paper, please provide (1) point-by-point responses to the issues raised by the reviewers as file type "Response to Reviewers," not in your cover letter, and (2) a PDF file that indicates the changes from the original submission (by highlighting or underlining the changes) as file type "Marked Up Manuscript - For Review Only". Please use this link to submit your revised manuscript. Detailed instructions on submitting your revised paper are below.

Link Not Available

Thank you for the privilege of reviewing your work. Below you will find instructions from the Microbiology Spectrum editorial office and comments generated during the review.

The ASM Journals program strives for constant improvement in our submission and publication process. Please tell us how we can improve your experience by taking this quick [Author Survey](#).

Sincerely,

Xiaoyu Tang

Editor, Microbiology Spectrum

Reviewer comments:

Reviewer #2 (Comments for the Author):

The manuscript has been improved a lot, please fix the following.

1. In results, the title of each section should be same as the line 145 that show a specific conclusion.
2. Experiment details should not be appeared in "Result sections".
3. In Results and Discussion, the author should be described the results more concisely, rather than a repetitive description. For example, Fig.S1a should be a part of the Disease Activity Index (DAI) score and so on. Please reorganize the description in both sections.
4. In Fig 5a, the data should be better presented regarding up-regulated genes and down-regulated genes involved in metabolic pathway, respectively.
5. In discussion, the creativity of manuscript should be noted compared with the similarity studies which published before.

### Preparing Revision Guidelines

To submit your modified manuscript, log onto the eJP submission site at <https://spectrum.msubmit.net/cgi-bin/main.plex>. Go to Author Tasks and click the appropriate manuscript title to begin the revision process. The information that you entered when you first submitted the paper will be displayed. Please update the information as necessary. Here are a few examples of required updates that authors must address:

- Point-by-point responses to the issues raised by the reviewers in a file named "Response to Reviewers," NOT IN YOUR COVER LETTER.
- Upload a compare copy of the manuscript (without figures) as a "Marked-Up Manuscript" file.
- Each figure must be uploaded as a separate file, and any multipanel figures must be assembled into one file.
- Manuscript: A .DOC version of the revised manuscript
- Figures: Editable, high-resolution, individual figure files are required at revision, TIFF or EPS files are preferred

For complete guidelines on revision requirements, please see the journal Submission and Review Process requirements at <https://journals.asm.org/journal/Spectrum/submission-review-process>. **Submissions of a paper that does not conform to Microbiology Spectrum guidelines will delay acceptance of your manuscript. "**

Please return the manuscript within 60 days; if you cannot complete the modification within this time period, please contact me. If you do not wish to modify the manuscript and prefer to submit it to another journal, please notify me of your decision immediately so that the manuscript may be formally withdrawn from consideration by Microbiology Spectrum.

If your manuscript is accepted for publication, you will be contacted separately about payment when the proofs are issued; please follow the instructions in that e-mail. Arrangements for payment must be made before your article is published. For a complete list of **Publication Fees**, including supplemental material costs, please visit our [website](#).

Corresponding authors may [join or renew ASM membership](#) to obtain discounts on publication fees. Need to upgrade your membership level? Please contact Customer Service at [Service@asmusa.org](mailto:Service@asmusa.org).

Thank you for submitting your paper to Microbiology Spectrum.



1 **Manuscript No.: Spectrum 01651-22**

2 **Title: Probiotics (*Lactobacillus plantarum* HNU082) supplementation relieves**  
3 **ulcerative colitis by affecting intestinal barrier functions, immunity-related genes**  
4 **expression, gut microbiota, and metabolic pathways in mice.**

5 **Dear Dr. Xiaoyu Tang,**

6 I am very glad to receive your email again! On behalf of my co-authors, I thank  
7 you very much for allowing us to revise our manuscript. We appreciate the time and  
8 effort that you and the reviewers dedicated to providing feedback on our manuscript  
9 and are grateful for the insightful comments on and valuable improvements to our  
10 manuscript. We have discussed reviewer's comments carefully and revised the  
11 manuscript taking all the comments positively. All revisions in the manuscript have  
12 been highlighted in yellow. Please find the point-to-point responses to reviewers'  
13 comments in the following text. We thoroughly double-checked the manuscript. In  
14 addition, the revised manuscript with tracked changes is also uploaded as "Marked Up  
15 Manuscript" files.

16

17 We sincerely hope that this revised manuscript will be published in "*Microbiology*  
18 *Spectrum*." We deeply appreciate your consideration of our manuscript. If you have  
19 any queries, please don't hesitate to contact us at the following e-mail address.

20

21 We would like to express our great appreciation again to you and the reviewers for  
22 their comments on our paper. We are looking forward to hearing from you.

23

24 Sincerely,

25 Jiachao Zhang

26 Yours sincerely,

27 E-mail: Jiachao Zhang1\*, zhjch321123@163.com

28 College of Food Science and Engineering, Hainan University, Haikou 570228, China

29 **Responds to the reviewer's comments**

30 Reviewer #2 (Comments for the Author):

31

32 The manuscript has been improved a lot, please fix the following.

33 **Response:** We appreciate the time and effort you dedicated to providing feedback on  
34 our manuscript and are grateful for the insightful comments and valuable  
35 improvements to our manuscript. We have discussed your comments carefully, and we  
36 sincerely accept the suggestions. Your comments provided valuable insights to refine  
37 its contents and analysis. In this document, we try to address the issues raised as best  
38 as possible. All revisions in the manuscript have been highlighted in yellow. A list of  
39 changes to the manuscript has been attached, and you can kindly find the  
40 point-to-point responses to your comments in the following text.

41

42 1. In results, the title of each section should be same as the line 145 that show a  
43 specific conclusion.

44 **Response:** We appreciate your valuable and helpful comment and we deeply agree  
45 with the opinions of reviewer. According to your helpful suggestions, we have  
46 rewritten the title of each section in results, and we have also improved the title of the  
47 conclusion. We sincerely thank you again for pointing this out. It was very helpful.  
48 The changes have been highlighted in the manuscript in yellow. And the revised  
49 content is as follows.

50

51 The intake of Lp082 alleviated physiological lesions in DSS-induced colitis mice  
52 (Page 6, line:145)

53

54 The intake of Lp082 up-regulated the anti-inflammatory cytokines and  
55 down-regulated the pro-inflammatory cytokines in DSS-induced colitis mice  
56 (Page 7, line:192-193)

57 The intake of Lp082 alleviated pathological lesions in DSS-induced colitis mice  
58 (Page 8, line: 203)

59

60 The intake of Lp082 regulated the gut microbiota in DSS-induced colitis mice  
61 (Page 9, line: 238)

62

63 The intake of Lp082 regulated the short chain fatty acid in DSS-induced colitis mice  
64 (Page 10, line: 265-266)

65

66 The intake of Lp082 regulated the transcriptome of intestinal epithelial cells in  
67 DSS-induced colitis mice  
68 (Page 12, line: 328-329)

69

70 The potential mechanism of Lp082 alleviated the DSS-induced colitis  
71 (Page 14, line: 398)

72

73 The intake of Lp082 improved the chemical barrier  
74 (Page 16, line: 449)

75

76 The intake of Lp082 improved the mechanical barrier  
77 (Page 17, line: 482)

78

79 The intake of Lp082 improved the immune barrier  
80 (Page 18, line: 513)

81

82 The intake of Lp082 improved the biological barrier  
83 (Page 20, line: 576)

84

85 2. Experiment details should not be appeared in "Result sections".

86 **Response:** We are grateful to the reviewer for pointing out this problem. We deeply  
87 agree with the opinions of reviewer. We are very sorry for our negligence and we  
88 sincerely apologize for the inconvenience caused to you. According to your helpful  
89 suggestions, we have moved the contents of the experimental details appeared in  
90 "Result" sections to the "Materials and methods" section, and we have rewritten the  
91 relevant content in the results section. We have carefully checked and verified the  
92 contents of the "Result" section again. The changes have been highlighted in the  
93 manuscript in yellow. And the revised content is as follows. We sincerely thank you  
94 again for pointing this out. It was very helpful.

95

96 To further evaluate colon injury, we quantified the pro-inflammatory cytokines  
97 interleukin-1beta (IL-1 $\beta$ ), interleukin-6 (IL-6), interferon-gamma (IFN- $\gamma$ ), tumor  
98 necrosis factor-alpha (TNF- $\alpha$ ), and myeloperoxidase (MPO), and anti-inflammatory  
99 cytokines interleukin-10 (IL-10) in serum of 6 mice in each group. The results showed  
100 that compared with the control group, the pro-inflammatory cytokines TNF-, IL-1 $\beta$ ,  
101 IFN- $\alpha$ , IL-6, and MPO in DSS group were significantly increased ( $p < 0.05$ ), while  
102 the anti-inflammatory cytokines IL-10 were significantly decreased ( $p < 0.05$ ), while  
103 the opposite was observed in Lp082 and SASP groups (Fig. 1e). (Page 7, line:  
104 194-201)

105

106 The results of Shotgun metagenomic data diversity analysis demonstrated the effect of  
107 Lp082 on the diversity of intestinal microbiota in mice. The results of  $\alpha$  diversity  
108 analysis showed that on days 1 - 7 of the study, the Shannon index in DSS, Lp082,  
109 and SASP groups were all significantly decreased (Fig. 3a) , but the Shannon index  
110 was significantly increased after the intake of Lp082 ( $p < 0.05$ ) (Fig. 3a). The results  
111 of  $\beta$  diversity analysis showed that the DSS group, LP082 group and SASP group  
112 (M\_B, M\_C, M\_D) and control group (M\_A) were significantly separated on day 7 ( $p$   
113  $< 0.05$ ) (Fig. 3b). However, on day 15, the DSS group was still significantly separated  
114 from the control group (T\_B), while the distance between Lp082 group (T\_C), SASP  
115 group (T\_D), and control group (T\_A) was significantly reduced ( $p$  values  $< 0.05$ ),

116 and the distance between Lp082 group and control group was closer, the above results  
117 were consistent with the principal co-ordinates analysis (PCoA) distance results (Fig.  
118 3c). The above diversity analysis results showed that Lp082 increased the  $\alpha$   
119 -diversity and optimized the  $\beta$ -diversity of cecal microbiota in mice. (Page 9, line:  
120 239-252)

121

122 Gene distribution was analyzed using colonic transcriptome data, the volcano map the  
123 results show that Lp082 significantly affected gene expression distribution (Fig. S5  
124 a-f). To further explore the impact of these differentially expressed genes (DEGs), we  
125 analyzed the pathways involved in DEGs. (Page 12, line: 330-333)

126

127 At the end of the experiment, we euthanized the mice , and the 1cm portion of the  
128 distal colon of 6 mice in each group was randomly selected for HE staining, and  
129 histopathological score and intestinal wall thickness were further measured (n=6).  
130 (Page 23, line: 674-676)

131

132 Six mice were randomly selected at two time points for metagenomic sequencing of  
133 feces. At the end of modeling (day 7 of the experiment), feces of 6 mice in each group  
134 were randomly selected for metagenomic sequencing. At the end of treatment (day 15  
135 of the experiment), feces of 6 mice in each group were randomly selected for  
136 metagenomic sequencing, to observe the effects of DSS and Lp082 on the intestinal  
137 microecology of mice. (Page 24, line: 706-711)

138

139 At the end of the experiment, 6 mice from each group were randomly selected for  
140 colon transcriptome RNA sequencing, and the volcanic map was drawn based on the  
141 preliminary gene distribution analysis results. The sequencing was performed by  
142 Beijing Novogene Co., Ltd. (Beijing, China). The RNA extraction mini kit (Qiagen,  
143 Hilden, Germany) was used for total RNA extraction from the mouse colon samples,  
144 and NanoDrop 2000 was used for quantification. Then the library construction and the  
145 quality control were carried on, and the raw RNA-seq data was filtered [1]. After

146 constructing the RNA library, Illumina Novaseq 6000 was used for sequencing, and  
147 the FeatureCounts were used to estimate the gene expression [2]. (Page 26, line:  
148 739-747)

149

## 150 **Reference**

151 1. Dobin A, Davis CA, Schlesinger F, Drenkow J, Zaleski C, Jha S, et al. STAR:  
152 ultrafast universal RNA-seq aligner. *Bioinformatics*. 2013;29(1):15-21; doi:  
153 10.1093/bioinformatics/bts635.

154 2. Liao Y, Smyth GK, Shi W. featureCounts: an efficient general purpose program for  
155 assigning sequence reads to genomic features. *Bioinformatics*. 2014;30(7):923-30;  
156 doi: 10.1093/bioinformatics/btt656.

157

158 3. In Results and Discussion, the author should be described the results more  
159 concisely, rather than a repetitive description. For example, Fig.S1a should be a part  
160 of the Disease Activity Index (DAI) score and so on. Please reorganize the description  
161 in both sections.

162 **Response:** We appreciate your valuable and helpful comment. We apologize for the  
163 language problems in the original manuscript. We sincerely apologize for the  
164 confusion caused to you. The language presentation was improved with assistance  
165 from a native English speaker with appropriate research background. We deeply and  
166 sincerely agree with you that Fig. S1a should indeed be part of the Disease Activity  
167 Index (DAI) score, we have put the two parts of the description together and  
168 reorganize the description. In addition, according to your helpful suggestions, We  
169 have rewritten the relevant content of the results and discussion section, and have  
170 described the results in more concise language, deleted the repeated description, and  
171 deepened the discussion. The changes have been highlighted in the manuscript in  
172 yellow. And the revised content is as follows.

173

174 People with UC have a disorder of colon function, poor absorption, loss of appetite,  
175 weight loss, diarrhea, and bloody stools [8]. Therefore, the lower the body weight, the

176 lower the amount of water and food intake, and the higher the disease activity index  
177 (DAI) score (The scoring criteria is shown in TABLE S1), indicating the more severe  
178 enteritis. (Page 6, line: 146-150)

179

180 From 1 to 7 days, the water intake, food intake, and body weight of the DSS group,  
181 the Lp082 group, and the SASP group all showed a similar degree of gradual decrease,  
182 which may be because these three groups were all under the same DSS modeling  
183 conditions on days 0-7. Then on the 8th to 15th day, the water intake, food intake, and  
184 body weight of the DSS group were still decreasing, but the water intake, food intake,  
185 and body weight of Lp082 and SASP group gradually increased. However, the water  
186 and food intake of the Lp082 combined SASP group increased significantly from day  
187 9 ( $p < 0.05$ ), and body weight increased significantly from day 12 ( $p < 0.05$ ). (Page 6,  
188 line: 151-158)

189

190 The DAI index of the DSS group, Lp082 group, and SASP group increased  
191 significantly ( $p < 0.05$ ) since the third day compared with the Control group. But after  
192 stopping DSS gavage on the 8th day, the DAI index of the DSS self-healing group  
193 still increased, while that of the Lp082 group and SASP group gradually decreased  
194 from the 10th day. And the degree of decrease in the Lp082 group was greater than  
195 that in the SASP group, indicating that Lp082 had a better improvement effect on DAI  
196 index (Fig. 1b). In addition, we observe that the feces of the mice in the DSS group  
197 were blood-red, but there was no blood in the feces after Lp082 and SASP ingestion  
198 (Fig. S1 a). This phenomenon is consistent with the measurement results of DAI  
199 index. (Page 6, line: 159-168)

200

201 An increase in immune organ index and a decrease in colon length indicate an  
202 increase in inflammation [2]. The results showed that the immune organ index of the  
203 DSS group was significantly increased ( $p < 0.05$ ), but was significantly decreased  
204 after Lp082 intake ( $p < 0.05$ ) (Fig. 1c). And the colon length of the mice in the DSS  
205 group was significantly decreased ( $p < 0.05$ ), but was significantly increased after

206 Lp082 intake ( $p < 0.05$ ) (Fig. 1d). (Page 6, line: 169-174)

207

208 Studies have shown that DSS-induced UC mice will have a worse mental state, even  
209 abdominal pain, arch back, panic and other symptoms with the increase of disease  
210 degree, and the spleen will also increase hyperemia and infection blackening [30].  
211 After successful modeling of UC, we observed that the mice in the control group were  
212 in a normal state, with normal urine and feces, shiny hair, active spirit, sensitive  
213 reaction, and increased body size. However, mice in the DSS, Lp082 and SASP  
214 groups had yellow and smelly urine, difficult defecation, bloody stool, dark and fried  
215 hair, slow reaction and easy panic, arched back, and reduced body size (Fig. S1 b). On  
216 the last day of treatment (Day 15), the mental state of the DSS mice was still poor, but  
217 the mental state of mice in the Lp082 and SASP groups gradually returned to normal,  
218 with an active spirit, no arched back, no hematochezia and shiny hair (Fig. S1 b). In  
219 addition, we found that the spleens of mice in the DSS group were significantly larger  
220 and darker than those of mice in the normal group, but the spleen gradually returned  
221 to normal in size and color after the Lp082 and SASP intake. (Fig. S1 c). (Page 7, line:  
222 175-188)

223

224 The results of Shotgun metagenomic data diversity analysis demonstrated the effect of  
225 Lp082 on the diversity of intestinal microbiota in mice. The results of  $\alpha$  diversity  
226 analysis showed that on days 1 - 7 of the study, the Shannon index in DSS, Lp082,  
227 and SASP groups were all significantly decreased (Fig. 3a) , but the Shannon index  
228 was significantly increased after the intake of Lp082 ( $p < 0.05$ ) (Fig. 3a). The results  
229 of  $\beta$  diversity analysis showed that the DSS group, LP082 group and SASP group  
230 (M\_B, M\_C, M\_D) and control group (M\_A) were significantly separated on day 7 ( $p$   
231  $< 0.05$ ) (Fig. 3b). However, on day 15, the DSS group was still significantly separated  
232 from the control group (T\_B), while the distance between Lp082 group (T\_C), SASP  
233 group (T\_D), and control group (T\_A) was significantly reduced ( $p$  values  $< 0.05$ ),  
234 and the distance between Lp082 group and control group was closer, the above results  
235 were consistent with the principal co-ordinates analysis (PCoA) distance results (Fig.



236 3c). The above diversity analysis results showed that Lp082 increased the  $\alpha$   
237 -diversity and optimized the  $\beta$ -diversity of cecal microbiota in mice. (Page 9, line:  
238 239-252)

239

240 Gene distribution was analyzed using colonic transcriptome data, the volcano map the  
241 results show that Lp082 significantly affected gene expression distribution (Fig. S5  
242 a-f). To further explore the impact of these differentially expressed genes (DEGs), we  
243 analyzed the pathways involved in DEGs. (Page 12, line: 330-333)

244

## 245 Reference

- 246 1. Costello SP, Hughes PA, Waters O, Bryant RV, Vincent AD, Blatchford P, et al.  
247 Effect of Fecal Microbiota Transplantation on 8-Week Remission in Patients With  
248 Ulcerative Colitis A Randomized Clinical Trial. *Jama-Journal of the American*  
249 *Medical Association*. 2019;321(2):156-64; doi: 10.1001/jama.2018.20046.
- 250 2. Rodriguez-Nogales A, Algieri F, Garrido-Mesa J, Vezza T, Pilar Utrilla M, Chueca  
251 N, et al. Differential intestinal anti-inflammatory effects of *Lactobacillus*  
252 *fermentum* and *Lactobacillus salivarius* in DSS mouse colitis: impact on  
253 microRNAs expression and microbiota composition. *Molecular Nutrition & Food*  
254 *Research*. 2017;61(11); doi: 10.1002/mnfr.201700144.
- 255 3. Sun MY, Liu YJ, Song YL, Gao Y, Zhao FJZ, Luo YH, et al. The ameliorative  
256 effect of *Lactobacillus plantarum*-12 on DSS-induced murine colitis. *Food &*  
257 *Function*. 2020;11(6):5205-22; doi: 10.1039/d0fo00007h.

258

259 We sincerely thank you again for pointing this out. It was very helpful.

260

261 4. In Fig 5a, the data should be better presented regarding up-regulated genes and  
262 down-regulated genes involved in metabolic pathway, respectively.

263 **Response:** We appreciate your valuable and helpful comment. We deeply and  
264 sincerely understand the reviewer's idea. Fig. 5a is the results of Gene Ontology (GO)  
265 enrichment analysis, GO can be divided into three categories, namely Biological

266 processes, Cellular Component and Molecular Function. In the initial analysis, I tried  
267 to show the specific gene results and the up-regulation and down-regulation of  
268 specific genes in the Gene Ontology pathway, but we did not do so in the end.  
269 The reason we focus on the pathways in which genes are enriched, rather than the  
270 genes in the pathways are as follows: By annotating the transcriptome data, we have a  
271 volcanic map that reveals the distribution of gene expression and shows that the total  
272 number of annotated genes is close to 20,000 (Fig. S5). There are so many genes that  
273 it's too difficult for us to find rules among them. Through the investigation of  
274 references [1], we found that a large number of disordered genes could be enriched  
275 into a small number of pathways by gene enrichment analysis, so as to facilitate us to  
276 explore the characteristics and rules between pathways. Gene enrichment analysis is a  
277 common way to process a large amount of gene data, which can facilitate us to find  
278 the rules among genes and GO enrichment analysis is one of the enrichment methods  
279 [2]. The minimum value of GeneRatio of the GO term in Fig. 5a is 0.1, if the input  
280 data used for enrichment analysis is assumed to be 1000 genes, then according to the  
281 formula [3]:  $\text{GeneRatio} = \frac{\text{the number of genes enriched to this GO term}}{\text{the number of all input genes used for enrichment analysis}}$ , it can be concluded that the number of  
282 genes enriched to the GO entry is 100 genes. There were 100 genes in one GO term,  
283 1,000 genes in 10 GO terms. In fact, we calculated that the number of genes enriched  
284 in a certain GO pathway was much greater than 100, because the number of  
285 differentially expressed genes we input was much greater than 1000. That's why we  
286 chose to analyze and present the pathway results, rather than listing every single gene  
287 up-regulation and down-regulation in the pathway, because the amount of genetic data  
288 is too large to find regular. Maza et al.[4] and Wang et al. [5] process a large number of  
289 gene data through enrichment analysis, and finally find rules in pathway.  
290

291 Our previous analysis idea was as follows: Since the preliminary analysis of  
292 transcriptome data showed that the intake of Lp082 affects the gene expression  
293 distribution (**Fig. S5**), in order to explore the relationship between a large number of  
294 genes, we conducted GO pathway enrichment analysis and KEGG pathway  
295 enrichment analysis for the differentially expressed genes (DEGs). Since the

296 differentially expressed genes (DEGs) were more enriched in the biological process  
297 (BP) pathway among the three major GO pathway categories (**Fig. 5a-c**). And  
298 compared with the DSS group, the number of significantly up-regulated genes in  
299 Lp082 group is more than the down-regulated genes (**Fig. 5d**), so we performed  
300 further GO-BP pathway enrichment analysis on the significantly up-regulated  
301 differentially expressed genes (**Fig. 6d-6f**). Subsequently, we learned about some  
302 genes that are abnormally expressed in inflammatory situations through literature,  
303 analyzed the up-down regulation of these specific inflammatory genes, and found  
304 similar rules in our data (**Fig. 6g-6i**). We have 6 biological replicates in each group,  
305 and our data are realistic and objective enough to support our conclusion.

306 We appreciate your valuable and helpful comment again and we deeply agree  
307 with the opinions of reviewer. We are deeply sorry for our not clear description.  
308 According to your helpful suggestions, we have rewritten this part. The changes have  
309 been highlighted in the manuscript in yellow. The rewritten content is more detailed,  
310 and the details are as follows. (Page 12, line: 330-396)

311 Gene distribution was analyzed using colonic transcriptome data, the volcano  
312 map the results show that Lp082 significantly affected gene expression distribution  
313 (Fig. S5 a-f). To further explore the impact of these differentially expressed genes  
314 (DEGs), we analyzed the pathways involved in DEGs.

315 Fig. 5a is the results of Gene Ontology (GO) enrichment analysis, GO can be  
316 divided into three categories, namely Biological processes, Cellular Component and  
317 Molecular Function. The results of gene ontology (GO) analysis (n=6) showed that  
318 the DEGs of the DSS group and the control group were mainly involved in biological  
319 processes such as the humoral immune response, activation of an immune response,  
320 negative regulation of hemostasis; and cellular components such as blood  
321 microparticle, membrane attack complex; and molecular functions such as lipid  
322 binding, lipopolysaccharide-binding, thrombospondin receptor activity (Fig. 5a). On  
323 the other hand, the DEG of the Lp082 and DSS groups was mainly involved in  
324 biological processes such as blood coagulation, fibrin clot formation, regulation of  
325 humoral immune markers, regulation of inflammatory cytokines; and cellular

326 components such as Golgi lumen, endoplasmic reticulum, and molecular functions  
327 such as endopeptidase activity and peptidase activity (Fig. 5b).

328       Considering that in the Lp082, the up-regulated DEGs were far more than  
329 down-regulated DEGs (Fig. S5 a-f), and the DEGs have the largest proportion of  
330 participation in biological processes (Fig. 5a-5c), we further conducted GO-BP  
331 analysis (n=6) on significantly up-regulated DEGs. The results of GO-BP analysis  
332 showed that compared to control group, up-regulated DEGs in DSS group were  
333 mainly enriched in the 6 inflammation-related GO-BP. Among those, the genes IL-1 $\beta$   
334 and IL-1 $\alpha$  were both involved in the IL-1 $\beta$  production and TNF production, the  
335 oncogene Ereg were involved in the IL-1 $\beta$  production, the genes IL-1 $\beta$  and IL-1rn,  
336 oncogene Fga were all involved in positive regulation of nuclear factor kappa-B  
337 (NF- $\kappa$ B) transcription factor activity, the oncogene Ldlr, Dgat2, and Mfsd2a were all  
338 involved in the regulation of toll-like receptor 4 signaling pathway, the pro-oncogenes  
339 Cdc7, Dbf4 were all involved in the acute inflammatory response, the anti-tumour  
340 gene Syk and the inflammatory genes Nlrp3 as well as Syk were all involved in the  
341 pro-inflammatory factor IL-6 production (Fig. 5d). Compared to DSS group, the  
342 up-regulated genes in Lp082 group were mainly enriched in the 6  
343 anti-inflammatory-related GO-BP. Among them, the gene Isg15, which exerted both  
344 its antiviral and anti-inflammatory effects in innate immunity, and the gene Prg2,  
345 which played an important role in wound healing, were involved in the  
346 anti-inflammatory factors IL-10 production (Fig. 5e).

347       To further observe whether Lp082 treatment would suppress these inflammatory  
348 and cancer genes enriched on inflammatory pathways in the DSS group, we  
349 supplemented Fig. S6. As can be seen from Fig. S6, among the 13 inflammatory genes  
350 or oncogenes that were up-regulated and enriched in the inflammatory pathway in the  
351 DSS group, the following 10 genes were significantly down-regulated in the Lp082  
352 group: IL-1 $\beta$ , IL-1 $\alpha$ , Ereg, IL -1rn, Fga, Ldlr, Dgat2, Mfsd2a, Cdc7, Dbf4 (Fig. S6)

353       The results of kyoto encyclopedia of genes and genomes (KEGG) analysis (n=6)  
354 showed that the DEGs in DSS and control groups were mainly enriched in systemic  
355 lupus erythematosus, Staphylococcus aureus infection, Viral carcinogenesis, Pathways

356 in cancer, TNF signaling pathway, Cellular senescence, and mitogen-activated protein  
357 kinase (MAPK) signaling pathway (Fig. S2a). However, the DEG in both Lp082 and  
358 DSS groups, SASP and DSS groups, and SASP and Lp082 groups were mainly  
359 enriched in the following five pathways: Complement and coagulation cascades,  
360 Platelet activation, Autophagy - animal, Phagosome and N-Glycan biosynthesis (Fig.  
361 S2b-S2d). Besides, the DEGs in Lp082 and DSS groups, as well as SASP and DSS  
362 groups were involved in protein processing in the endoplasmic reticulum and  
363 metabolic pathways (Fig. S2b-S2c).

364 The results of gut mucosal barrier analysis showed that gene expression of  
365 MUC-2, ZO-1, ZO-2, occludin was significantly reduced in the DSS group but  
366 significantly increased in the Lp082 and SASP groups (p values < 0.05), and the gene  
367 expression of intercellular cell adhesion molecule-1 (ICAM-1), vascular cell adhesion  
368 molecule (VCAM,) claudin-1, and claudin-2 increased significantly in the DSS group  
369 but decreased significantly in the Lp082 and SASP groups (p values < 0.05)  
370 (Fig.5g-5j). It is worth mentioning that MUC-2 is an essential component of gut  
371 mucosa; ICAM-1 and VCAM induce gut mucosal lesions; ZO-1, ZO-2, and occludin  
372 promote tight junctions of gut epithelial cells; claudin-1 and claudin-2 increase  
373 intestinal permeability and aggravate inflammation.

374 Results of gene analysis related to NF- $\kappa$ B pathway showed that Lp082 also  
375 inhibited the mRNA expression of NF- $\kappa$ B1, NF- $\kappa$ B2, cyclooxygenase-2 (COX-2),  
376 inducible nitric oxide synthase (iNOS), Toll-4, and RelA. These genes are signaling  
377 molecules in the NF- $\kappa$ B signaling pathway (Fig.5g-5j).

378

## 379 **Reference**

- 380 1. Y. Liao, G. K. Smyth and W. Shi, featureCounts: an efficient general purpose  
381 program for assigning sequence reads to genomic features, *Bioinformatics*, 2014,  
382 30, 923-930.
- 383 2. G. E. Hume, E. V. Fowler, D. Lincoln, R. Eri, D. Templeton, T. H. Florin, J. A.  
384 Cavanaugh and G. L. Radford-Smith, Angiotensinogen and transforming growth  
385 factor beta1: novel genes in the pathogenesis of Crohn's disease, *Journal of*

386 *medical genetics*, 2006, 43, e51.

- 387 3. Liao Y, Smyth GK, Shi W. featureCounts: an efficient general purpose program  
388 for assigning sequence reads to genomic features. *Bioinformatics*.  
389 2014;30(7):923-30; doi: 10.1093/bioinformatics/btt656.
- 390 4. Maza E. In Papyro Comparison of TMM (edgeR), RLE (DESeq2), and MRN  
391 Normalization Methods for a Simple Two-Conditions-Without-Replicates  
392 RNA-Seq Experimental Design. *Frontiers in Genetics*. 2016;7; doi:  
393 10.3389/fgene.2016.00164.
- 394 5. Wang Y, li J, Ma C, Jiang S, Li C, Zhang L, et al. *Lactiplantibacillus plantarum*  
395 HNU082 inhibited the growth of *Fusobacterium nucleatum* and alleviated the  
396 inflammatory response introduced by *F. nucleatum* invasion. *Food & Function*.  
397 2021;12(21):10728-40; doi: 10.1039/d1fo01388b.

398

399 5. In discussion, the creativity of manuscript should be noted compared with the  
400 similarity studies which published before.

401 **Response:** We appreciate your valuable and helpful comment. We are very sorry for  
402 our negligence of the creativity of manuscript. We sincerely apologize for the  
403 confusion caused to you. According to your helpful suggestions, We have rewritten  
404 the relevant content of the discussion section. The rewritten content focuses more on  
405 creativity and innovation compared with similar studies published in the past. The  
406 changes have been highlighted in the manuscript in yellow. And the revised content is  
407 as follows.

408 Taniguchi et al. [1] found that ICAM-1 increases colonic mucosal damage. In our  
409 study, we found that the Lp082 can not only decreased the mRNA expressions of  
410 ICAM-1 and VCAM-1 but also can be effective in relieving intestinal mucosal lesions  
411 (i.e., reduced ulceration and inflammatory cell infiltration caused by DSS). While the  
412 adhesion molecules ICAM-1 and VCAM-1 are the key to the induction of intestinal  
413 mucosal lesions[2]. This suggests that Lp082 may reduce intestinal mucosal lesions  
414 by reducing mRNA expression of ICAM-1 and VCAM, thereby alleviating neutrophil  
415 infiltration and ulceration. The above results showed that probiotic Lp082 increased

416 the MUC-2 content in the mucus layer by restoring the number of goblet cells, and  
417 relieved the intestinal mucosal damage caused by ICAM-1 and VCAM-1, so as to  
418 repaired the chemical barrier. (Page 17, line: 470-480)

419

420 Cordeiro et al. [6] found that the content of ZO-1 and ZO-2 were significantly  
421 decreased in UC mice, but were increased after probiotic minas frescal cheese intake.  
422 Because Lp082 excellently improved histopathology, we speculated that Lp082 also  
423 has a regulatory effect on TJ molecules. To this end, we analyzed major TJ proteins,  
424 including ZO-1, ZO-2, and occludin. As expected, the mRNA expression and  
425 immunofluorescence protein content of ZO-1, the mRNA expression of ZO-2 and  
426 occludin were significantly decreased in DSS-induced UC mice, but were  
427 significantly improved in the Lp082 group, indicating that the improvement of the  
428 mechanical barrier by regulating TJ may be one of the mechanisms by which  
429 probiotic Lp082 exerts anti-UC. In addition, Icam-1 and VCAM-1, which are  
430 abnormally expressed in UC patients, were increased in DSS group [7]. Adhesion  
431 molecules ICAM-1 and VCAM-1 can not only induce intestinal mucosal injury [8],  
432 but also increase the permeability of intestinal mucosa [1] while anti-ICAM-1  
433 treatment can alleviate colonic mucosal injury [9]. Interestingly, the mRNA  
434 expression of ICAM-1 and VCAM-1 was found to decrease after Lp082 ingestion.  
435 Therefore, it can be thought that the alleviation of UC by Lp082 may be due to  
436 down-regulation of ICAM-1, VCAM-1 and increase protein quantity and mRNA  
437 expression of ZO-1, ZO-2 to reduce intestinal mucosal permeability, thereby  
438 inhibiting the entry of harmful bacteria and undigested food and toxins into the body  
439 and reducing inflammation. These results suggest that Lp082 repairs the intestinal  
440 mechanical barrier by regulating TJ. (Page 17, line: 491-511)

441

442 Although the exact etiology of UC is complex and uncertain, studies suggest that the  
443 NF- $\kappa$ B pathway plays a vital role in the pathogenesis of UC [10]. Our study has  
444 proved that Lp082 inhibits the NF- $\kappa$ B pathway by down-regulating the mRNA  
445 expression of NF- $\kappa$ B2, NF- $\kappa$ B1, COX-2, Rela, Toll4, iNOS, and that NF- $\kappa$ B can also

446 regulate inflammation by regulating cytokines [11]. Therefore, it can be suggested  
447 that Lp082 also has a specific regulatory effect on cytokines. To confirm this, we  
448 analyzed the cytokines associated with NF- $\kappa$ B. As expected, we observed that the  
449 mRNA expression level of pro-inflammatory cytokines (TNF- $\alpha$ , IL-1 $\beta$ , and IL-6) was  
450 significantly increased in the DSS group but significantly decreased in the Lp082  
451 group. It is interesting to note that the protein levels of TNF- $\alpha$ , IL-1 $\beta$ , and IL-6  
452 detected by ELISA kit were also increased in the DSS group and decreased after  
453 Lp082 intake. Among them, TNF- $\alpha$  can promote the proliferation and differentiation  
454 of T cells and increase intestinal inflammation [12]. The upregulation of IL-1 $\beta$  is  
455 involved in the recruitment and retention of leukocytes in inflamed tissues and can  
456 activate innate immune lymphocytes [13]. IL-6 activates NF- $\kappa$ B to regulate the  
457 dextran sulfate sodium-induced colitis in mice [14]. The above results indicate that  
458 Lp082 alleviates UC by inhibiting the levels of pro-inflammatory factors (TNF- $\alpha$ ,  
459 IL-1 $\beta$ , and IL-6). Interestingly, we also found that the mRNA expressions of  
460 anti-inflammatory cytokines IL10, TGF-1, and TGF-2 were significantly decreased in  
461 the DSS group but increased in the Lp082 group. IL-10 protein levels measured by  
462 ELISA kit also decreased in the DSS group and increased in the Lp082 group.  
463 Surprisingly, IL10, TGF-1, and TGF-2 were shown to activate Treg and  
464 anti-inflammatory macrophages to alleviate UC [15]. And Sato et al. [16] also found  
465 that the loss of IL-10 spontaneously gave rise to IBD, and Hume et al. [17] found that  
466 TGF- $\beta$ 1 and TGF- $\beta$ 2 could dramatically relieve intestinal inflammation in  
467 DSS-induced colitis mice. These results suggest that Lp082 alleviates UC by  
468 increasing the levels of anti-inflammatory factors IL10, TGF-1, and TGF-2. We  
469 further analyzed the specific regulatory effects of Lp082 on intestinal mucosal  
470 immunity. In addition to inflammatory factors, we also noticed that a heme protein,  
471 MPO, was significantly reduced in the Lp082 group. Trevisin et al. [18] found that  
472 MPO caused UC by producing cytokines and hypochlorite and that MPO in the colon  
473 of UC patients is mainly produced by neutrophil infiltration [19]. Interestingly, this is  
474 consistent with the fact that the DSS group had a severe neutrophil infiltration in this  
475 study. However, neutrophil infiltration and MPO content were significantly decreased



476 in the Lp082 group. This shows that Lp082 alleviates UC by reducing neutrophil  
477 infiltration and its secreted MPO content. Thus, our results suggest that Lp082 may  
478 play an anti-UC effect by inhibiting the NF- $\kappa$ B pathway, down-regulating  
479 pro-inflammatory cytokines, and up-regulating anti-inflammatory cytokines, reducing  
480 MPO content, thereby maintaining immune balance and protecting the immune barrier.  
481 (Page 18, line: 514-553)

482

### 483 **Reference**

- 484 1. Taniguchi T, Tsukada H, Nakamura H, Kodama M, Fukuda K, Saito T, et al. Effects  
485 of the anti-ICAM-1 monoclonal antibody on dextran sodium sulphate-induced  
486 colitis in rats. *Journal of gastroenterology and hepatology*. 1998;13(9):945-9; doi:  
487 10.1111/j.1440-1746.1998.tb00766.x.
- 488 2. Philpott JR, Miner PB, Jr. Antisense inhibition of ICAM-1 expression as therapy  
489 provides insight into basic inflammatory pathways through early experiences in  
490 IBD. *Expert Opin Biol Ther*. 2008;8(10):1627-32; doi:  
491 10.1517/14712598.8.10.1627.
- 492 3. Shi JL, Xie QG, Yue YX, Chen QX, Zhao LN, Evivie SE, et al. Gut microbiota  
493 modulation and anti-inflammatory properties of mixed lactobacilli in dextran  
494 sodium sulfate-induced colitis in mice. *Food & Function*. 2021;12(11):5130-43; doi:  
495 10.1039/d1fo00317h.
- 496 4. Edelblum KL, Turner JR. The tight junction in inflammatory disease:  
497 communication breakdown. *Current Opinion in Pharmacology*. 2009;9(6):715-20;  
498 doi: 10.1016/j.coph.2009.06.022.
- 499 5. Stio M, Retico L, Annese V, Bonanomi AG. Vitamin D regulates the tight-junction  
500 protein expression in active ulcerative colitis. *Scandinavian Journal of*  
501 *Gastroenterology*. 2016;51(10):1193-9; doi: 10.1080/00365521.2016.1185463.
- 502 6. Cordeiro BF, Alves JL, Belo GA, Oliveira ER, Braga MP, da Silva SH, et al.  
503 Therapeutic Effects of Probiotic Minas Frescal Cheese on the Attenuation of  
504 Ulcerative Colitis in a Murine Model. *Frontiers in Microbiology*. 2021;12; doi:  
505 10.3389/fmicb.2021.623920.

- 506 7. Nakamura S, Ohtani H, Watanabe Y, Fukushima K, Matsumoto T, Kitano A, et al.  
507 In situ expression of the cell adhesion molecules in inflammatory bowel disease.  
508 Evidence of immunologic activation of vascular endothelial cells. *Laboratory*  
509 *investigation; a journal of technical methods and pathology*. 1993;69(1):77-85.
- 510 8. Mitselou A, Grammeniatis V, Varouktsi A, Papadatos SS, Klaroudas A, Katsanos K,  
511 et al. Immunohistochemical Study of Adhesion Molecules in Irritable Bowel  
512 Syndrome: A Comparison to Inflammatory Bowel Diseases. *Advanced biomedical*  
513 *research*. 2021;10:21; doi: 10.4103/abr.abr\_2\_20.
- 514 9. Ruco LP, de Laat PA, Matteucci C, Bernasconi S, Sciacca FM, van der Kwast TH,  
515 et al. Expression of ICAM-1 and VCAM-1 in human malignant mesothelioma. *The*  
516 *Journal of pathology*. 1996;179(3):266-71.
- 517 10. Hu LH, Liu JY, Yin JB. Eriodictyol attenuates TNBS-induced ulcerative colitis  
518 through repressing TLR4/NF-kB signaling pathway in rats. *Kaohsiung Journal of*  
519 *Medical Sciences*. 2021;37(9):812-8; doi: 10.1002/kjm2.12400.
- 520 11. Bauer J, Namineni S, Reisinger F, Zoller J, Yuan DT, Heikenwalder M.  
521 Lymphotoxin, NF-kappa B, and Cancer: The Dark Side of Cytokines. *Digestive*  
522 *Diseases*. 2012;30(5):453-68; doi: 10.1159/000341690.
- 523 12. Xiao B, Laroui H, Ayyadurai S, Viennois E, Charania MA, Zhang YC, et al.  
524 Mannosylated bioreducible nanoparticle-mediated macrophage-specific TNF-alpha  
525 RNA interference for IBD therapy. *Biomaterials*. 2013;34(30):7471-82; doi:  
526 10.1016/j.biomaterials.2013.06.008.
- 527 13. 김연하, 김유림, 김성중, 황호근, Choi S-C, 김경숙, et al. Rebamipide Protects  
528 Colonic Damage Induced by Trinitrobenzene Sulfonic Acid (TNBS) via  
529 Down-Regulation of TNF- $\alpha$ , IL-1 $\beta$ , and ICAM-1. *Anatomy and Cell Biology*.  
530 2004;37(2):149-56.
- 531 14. Zhou X, Liu H, Zhang J, Mu J, Zalan Z, Hegyi F, et al. Protective effect of  
532 *Lactobacillus fermentum* CQPC04 on dextran sulfate sodium-induced colitis in  
533 mice is associated with modulation of the nuclear factor-kappa B signaling pathway.  
534 *Journal of Dairy Science*. 2019;102(11):9570-85; doi: 10.3168/jds.2019-16840.
- 535 15. Mohammadnia-Afrouzi M, Hosseini AZ, Khalili A, Abediankenari S, Amari A,

536 Aghili B, et al. Altered microRNA Expression and Immunosuppressive Cytokine  
537 Production by Regulatory T Cells of Ulcerative Colitis Patients. Immunological  
538 Investigations. 2016;45(1):63-74; doi: 10.3109/08820139.2015.1103749.

539 16. Sato Y, Takahashi S, Kinouchi Y, Shiraki M, Endo K, Matsumura Y, et al. IL-10  
540 deficiency leads to somatic mutations in a model of IBD. Carcinogenesis.  
541 2006;27(5):1068-73.

542 17. Hume GE, Fowler EV, Lincoln D, Eri R, Templeton D, Florin TH, et al.  
543 Angiotensinogen and transforming growth factor beta1: novel genes in the  
544 pathogenesis of Crohn's disease. Journal of medical genetics. 2006;43(10):e51; doi:  
545 10.1136/jmg.2005.040477.

546 18. Trevisin M, Pollock W, Dimech W, Savige J. Evaluation of a multiplex flow  
547 cytometric immunoassay to detect PR3- and MPO-ANCA in active and treated  
548 vasculitis, and in inflammatory bowel disease (IBD). Journal of immunological  
549 methods. 2008;336(2):104-12; doi: 10.1016/j.jim.2008.03.012.

550 19. Chin AC, Parkos CA. Neutrophil transepithelial migration and epithelial barrier  
551 function in IBD: potential targets for inhibiting neutrophil trafficking. Annals of the  
552 New York Academy of Sciences. 2006;1072:276-87; doi: 10.1196/annals.1326.018.

553

554 Once again, we thank you for the time you put in reviewing our paper and we are very  
555 grateful to your effort reviewing our paper and your positive feedback. The summary  
556 of our work as written by you is precise. Since your inputs have been precious, in the  
557 eventuality of a publication, we would like to acknowledge your contribution  
558 explicitly.

559

560

October 14, 2022

Prof. Jiachao Zhang  
Hainan University  
Food Science  
58 renmin road  
Haikou, Hainan 570228  
China

Re: Spectrum01651-22R2 (Probiotics (*Lactobacillus plantarum* HNU082) supplementation relieves ulcerative colitis by affecting intestinal barrier functions, immunity-related genes expression, gut microbiota, and metabolic pathways in mice)

Dear Prof. Jiachao Zhang:

Your manuscript has been accepted, and I am forwarding it to the ASM Journals Department for publication. You will be notified when your proofs are ready to be viewed.

The ASM Journals program strives for constant improvement in our submission and publication process. Please tell us how we can improve your experience by taking this quick [Author Survey](#).

As an open-access publication, Spectrum receives no financial support from paid subscriptions and depends on authors' prompt payment of publication fees as soon as their articles are accepted. You will be contacted separately about payment when the proofs are issued; please follow the instructions in that e-mail. Arrangements for payment must be made before your article is published. For a complete list of **Publication Fees**, including supplemental material costs, please visit our [website](#).

ASM policy requires that data be available to the public upon online posting of the article, so please verify all links to sequence records, if present, and make sure that each number retrieves the full record of the data. If a new accession number is not linked or a link is broken, provide production staff with the correct URL for the record. If the accession numbers for new data are not publicly accessible before the expected online posting of the article, publication of your article may be delayed; please contact the ASM production staff immediately with the expected release date.

Corresponding authors may [join or renew ASM membership](#) to obtain discounts on publication fees. Need to upgrade your membership level? Please contact Customer Service at [Service@asmusa.org](mailto:Service@asmusa.org).

Thank you for submitting your paper to Spectrum.

Sincerely,

Xiaoyu Tang  
Editor, Microbiology Spectrum

Journals Department  
American Society for Microbiology  
1752 N St., NW  
Washington, DC 20036  
E-mail: [spectrum@asmusa.org](mailto:spectrum@asmusa.org)

Supplemental Material: Accept
