# Supplementary material for: Probiotics (Lactobacillus plantarum HNU082) Supplementation Relieves Ulcerative Colitis by Affecting Intestinal Barrier Functions, Immunity-Related Gene Expression, Gut Microbiota, and Metabolic Pathways in Mice
Source: PubMed Central journal article supplement (PMC9769980; doi:10.1128/spectrum.01651-22), 2022-11-02
Supplement: spectrum.01651-22-s0001.pdf [file spectrum.01651-22-s0001.pdf]

1 **Supplementary figure legends**

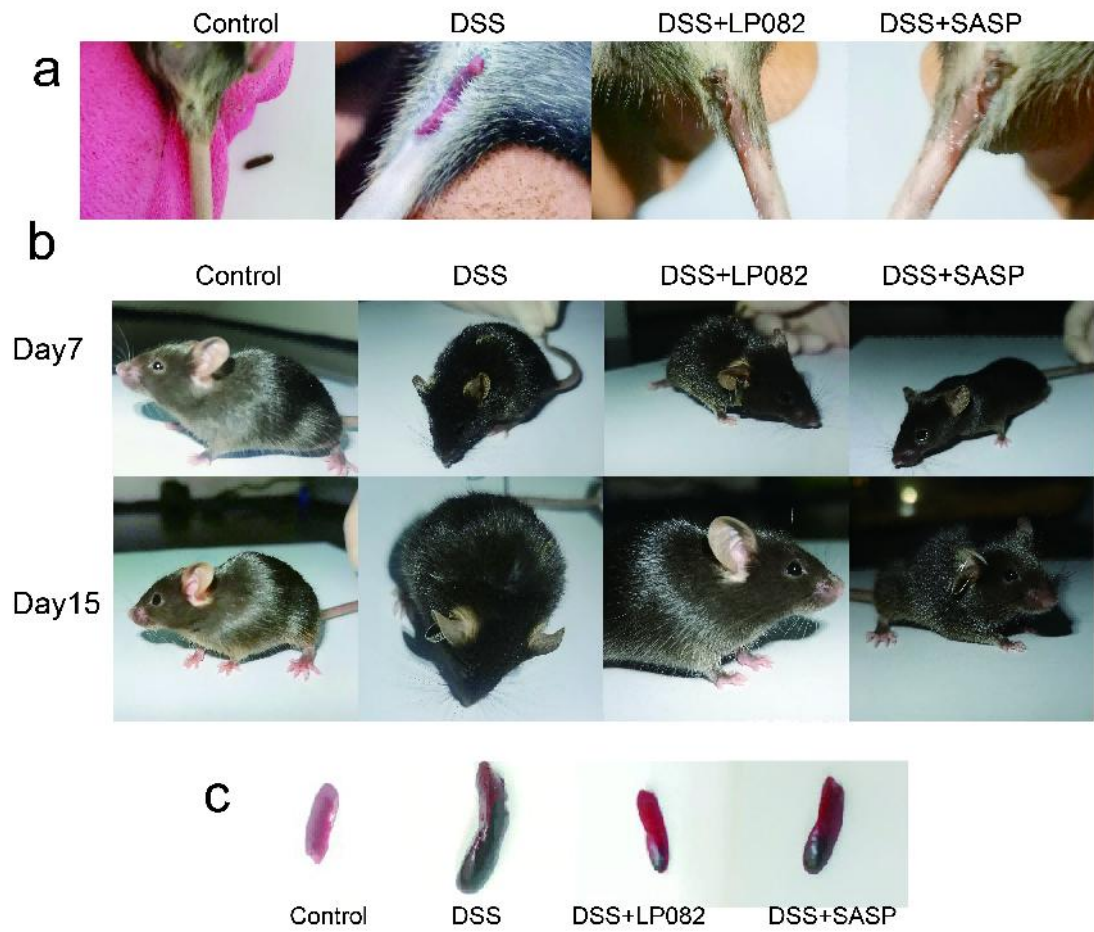

2

3 **Fig. S1.**

4 (a) Blood in the stool of experimental mice.

5 (b) Mental state of experimental mice.

6 (c) Spleen condition of experimental mice.

7

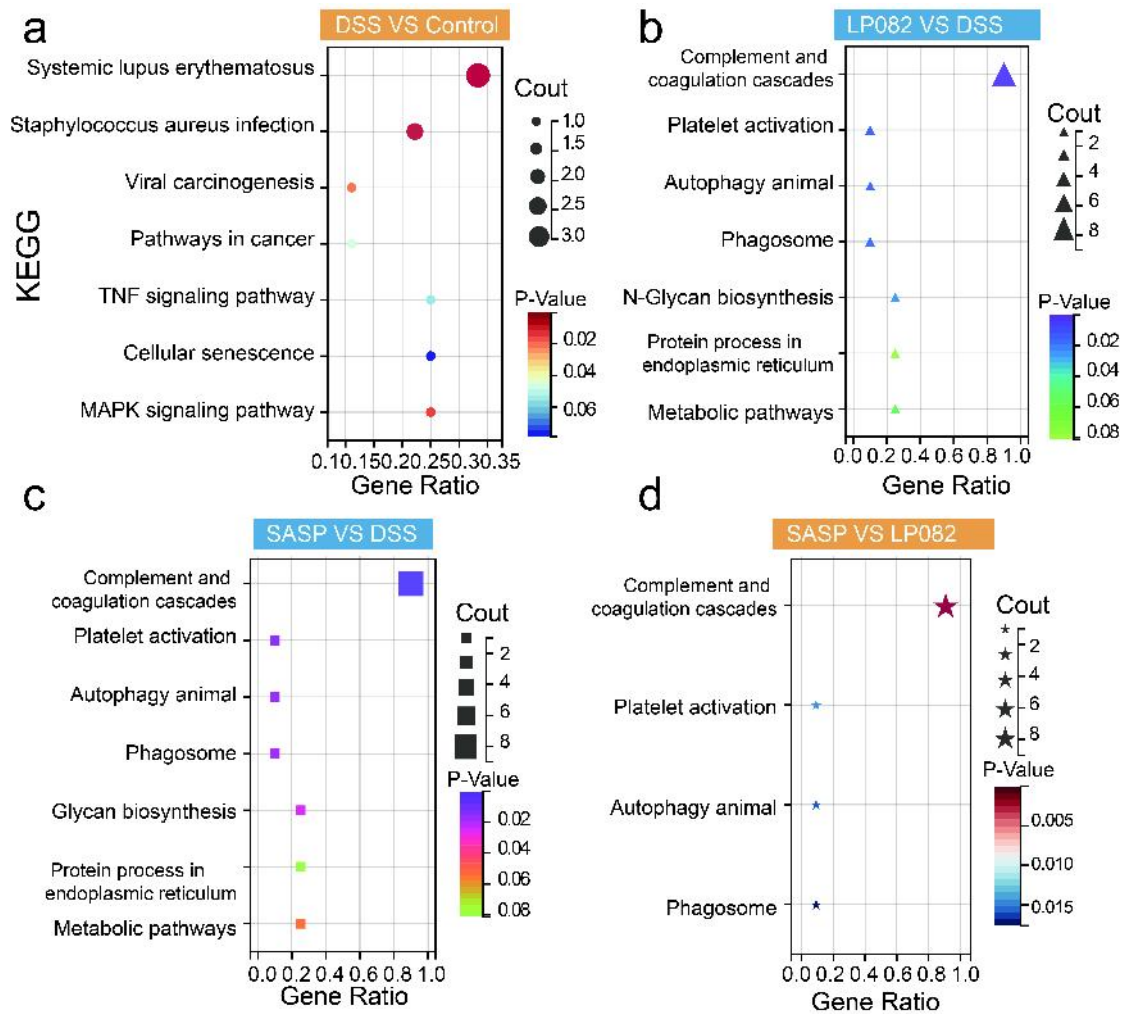

8

9 **Fig. S2.**

10 (a) KEGG pathway enriched by differentially expressed genes between DSS and  
 11 control groups.

12 (b) KEGG pathway enriched by differentially expressed genes between Lp082 and  
 13 DSS groups.

14 (c) KEGG pathway enriched by differentially expressed genes between SASP and  
 15 DSS groups.

16 (d) KEGG pathway enriched by differentially expressed genes between SASP and  
 17 Lp082 groups.

18 Wilcoxon signed-rank test is used here. Each group had at least 6 biological  
 19 replicates.

20

a

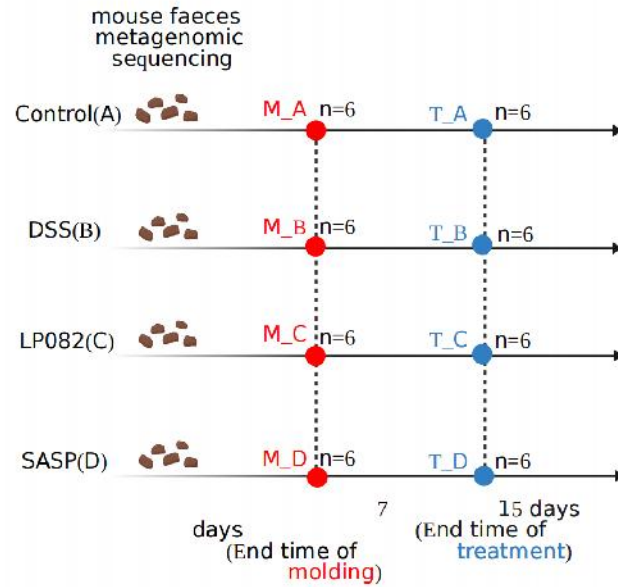

21

22 **Fig. S3 (a) Timepoints and grouping of mouse metagenomic sequencing**

23 M means the modeling period, T means the treatment period. Respectively, A, B, C  
24 and D group mean 7 days normal water (ultrapure water), DSS, Lp082 and SASP  
25 treatment after 7 days DSS gavage.

26 M-A means A group represents the control group on the 7th day of DSS modeling,  
27 M-B represents the DSS group on the 7th day of DSS modeling, M-C represents the  
28 Lp082 group on the 7th day of DSS modeling, M-D represents the SASP on the 7th  
29 day of DSS treatment Group.

30 T-A means treating-A group represents the control group at the end of the treatment,  
31 T-B represents the DSS group at the end of the treatment, T-C represents the Lp082  
32 group at the end of the treatment, and T-D represents the SASP group at the end of the  
33 treatment.

34

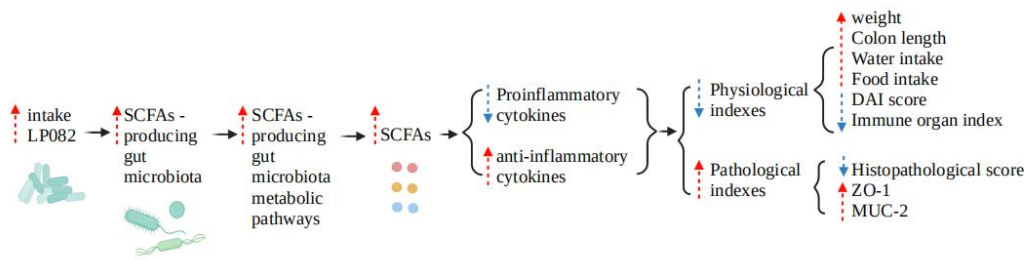

35

36 **Fig. S4. The underlying mechanism by which Lp082 regulates SCFAs to alleviate**

37 **UC**

38

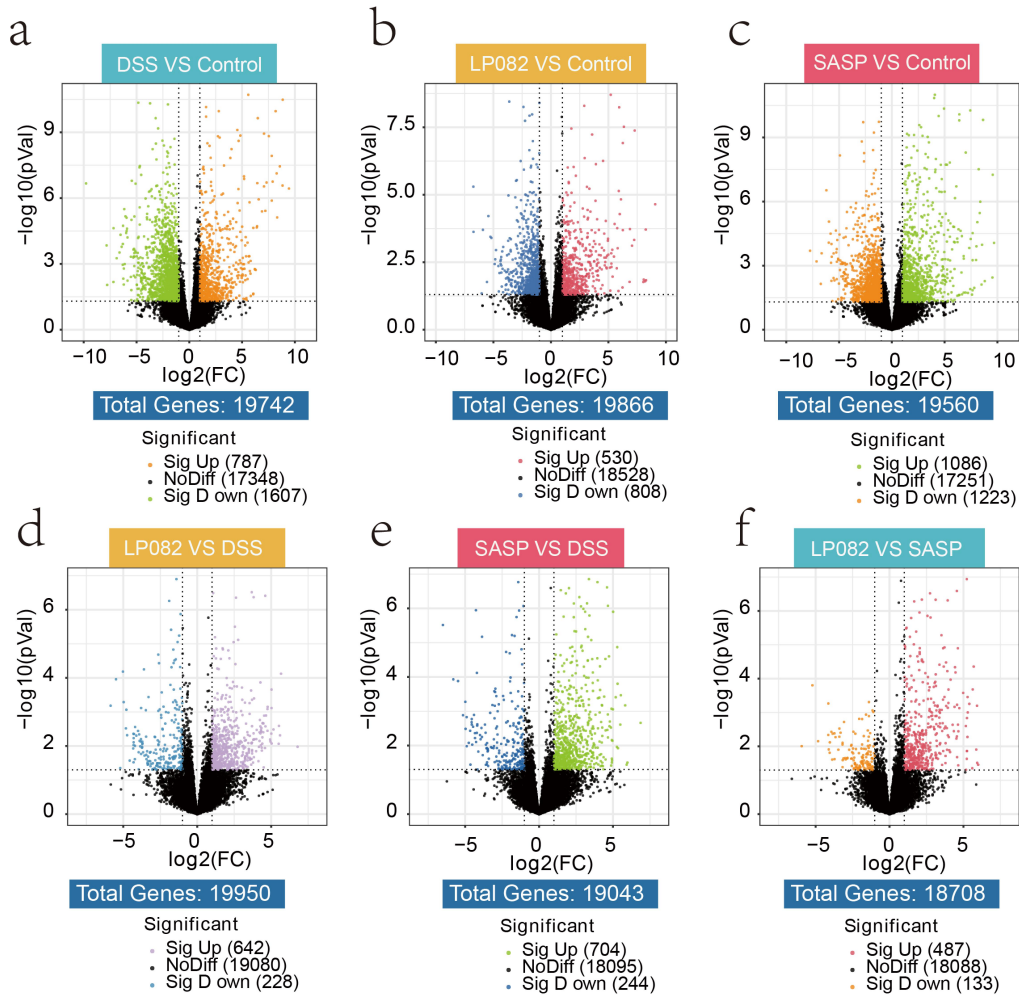

39

40 **Fig. S5. Effects of Lp082 on gene expression distribution in mouse colon tissue.**

41 (a) Gene expression distribution in the DSS group compared with the control group.

42 (b) Gene expression distribution in the Lp082 group compared with the control group.

43 (c) Gene expression distribution in the SASP group compared with the control group.

44 (d) Gene expression distribution in the Lp082 group compared with the DSS group.

45 (e) Gene expression distribution in the SASP group compared with the DSS group.

46 (f) Gene expression distribution in the Lp082 group compared with the SASP group.

47 Wilcoxon signed-rank test is used here. Each group had at least 6 biological

48 replicates.

49

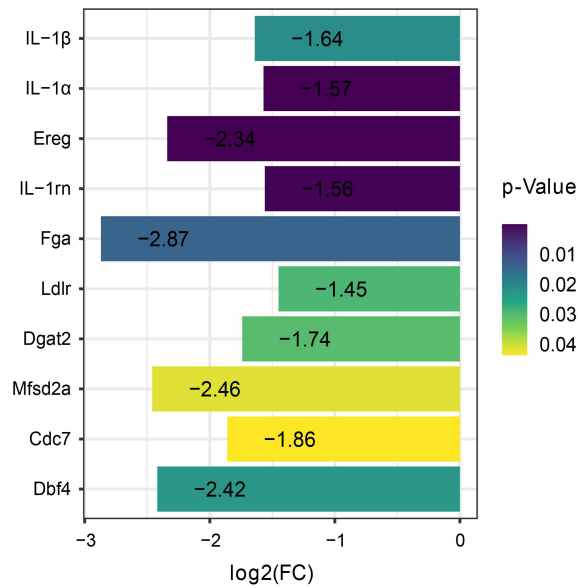

50

51 **Fig. S6. The effect of Lp082 treatment on up-regulated inflammatory genes in the**  
 52 **DSS group in Fig. 6d.**

53 The 13 inflammatory genes or oncogenes that were up-regulated and enriched in  
 54 the inflammatory pathway in the DSS group, the following 10 genes were  
 55 significantly down-regulated in the Lp082 group: IL-1β, IL-1α, Ereg, IL -1rn, Fga,  
 56 Ldlr, Dgat2, Mfsd2a, Cdc7, Dbf4.

57 Wilcoxon signed-rank test is used here. Each group had at least 6 biological  
 58 replicates.

59

60

61

62

63 **Supplementary table legends**

| <b>Score</b> | <b>Weight loss<br/>(%)</b> | <b>Stool consistency</b>                                                                            | <b>Visible blood in<br/>faeces</b> |
|--------------|----------------------------|-----------------------------------------------------------------------------------------------------|------------------------------------|
| 0            | 0                          | Normal                                                                                              | Normal                             |
| 1            | 1~5                        | Loose state, which is pasty and semi-formed stool that does not adhere to anus                      | Positive for FOBT                  |
| 2            | 6~10                       | Obvious loose state, which is a pasty and basically unformed stool that does not adhere to the anus | Strongly positive for FOBT         |
| 3            | 11~15                      | Dilute stool is a watery stool that can adhere to the anus                                          | Visible blood in faeces            |
| 4            | ≥16                        | The degree of loose stool is more obvious, and the thin water sample is more clear and long         | Obvious visible blood in faeces    |

64

65 **Table S1.**

66 Disease activity index (DAI) scoring system of dextran sodium sulfate-induced colitis.

67 The DAI scoring system consists of three parts: weight loss, stool consistency, and

68 visible blood in feces. Each part has 5 grades from 0 to 4. A score of 0 means that the

69 three indicators are normal, and the closer the score is to 4, the more serious

70 inflammation it is.

71

| <b>Project</b>                   | <b>Degree</b>                            | <b>Score</b> |
|----------------------------------|------------------------------------------|--------------|
| <b>Inflammation</b>              | None                                     | 0            |
|                                  | Mild or few                              | 1            |
|                                  | Moderate                                 | 2            |
|                                  | Severe massive                           | 3            |
|                                  | Extremely severe and massive             | 4            |
| <b>Depth of inflammation</b>     | None                                     | 0            |
|                                  | Submucosal layer                         | 1            |
|                                  | muscular layer                           | 2            |
|                                  | Serous layer                             | 3            |
|                                  | Transmural                               | 4            |
| <b>Range of inflammation (%)</b> | 0                                        | 0            |
|                                  | 1~25                                     | 1            |
|                                  | 26~50                                    | 2            |
|                                  | 51~75                                    | 3            |
|                                  | 76~100                                   | 4            |
| <b>Cryp damage</b>               | None                                     | 0            |
|                                  | 1/3 crypt of basement was destroyed      | 1            |
|                                  | 2/3 crypt of basement was destroyed      | 2            |
|                                  | Only intact surface epithelium           | 3            |
|                                  | All crypts and epithelium were destroyed | 4            |
| <b>Goblet cell loss</b>          | None                                     | 0            |
|                                  | 1~25%                                    | 1            |
|                                  | 26~50%                                   | 2            |
|                                  | 51~75%                                   | 3            |
|                                  | 75~100%                                  | 4            |



|                                |                               |   |
|--------------------------------|-------------------------------|---|
| <b>The degree of</b>           | None                          | 0 |
| <b>neutrophil infiltration</b> |                               |   |
|                                | Crypt base infiltration       | 1 |
|                                | Muscularis mucosae infiltrate | 2 |
|                                | Muscularis mucosae severity   | 3 |
|                                | infiltrate                    |   |
|                                | Mucosal thickening and edema  |   |
|                                | Submucosal infiltration       | 4 |

73

74 **Table S2.**

75 Histopathology scoring system of dextran sodium sulfate-induced colitis. The  
76 Histopathology scoring system was modified from previous studies [70]. The  
77 modified scoring system consists of six parts, namely, depth of Inflammation, range of  
78 inflammation (%), crypt damage, goblet cell loss, and the degree of neutrophil  
79 Infiltration. Each component was rated on a scale of 0 to 4, a score of 0 means that the  
80 three indicators are normal, and the closer the score is to 4, the more serious  
81 inflammation it is.

82
